# Supplementary material for: Immobilization of 129I in nuclear waste glass matrixes synthesized under high-pressure conditions: an experimental study
Source: Royal Society of Chemistry journal article supplement (doi:10.1039/d1ta05011g), 2021-01-01
Supplement: d1ta05011g1.xlsx [file d1ta05011g1.xlsx]

## Sheet: EPMA ISG standard
	ISG wout I		ISG-A with I		ISG-B with I			ISG Theoretical Gin et al. (2013)
Analyses	Al2O3 (mol.%)	I	Al2O3	I	Al2O3	I		Al2O3	3.8
Average	4.04913	0.00778722	4.0711	1.27777	4.03264	1.32939
Standard Deviation	0.138636	0.0120902	0.13211	0.0626728	0.142889	0.0693523
1	4.11632	5.45306e-06	4.28353	1.31964	3.73555	1.23043
2	4.09451	0.0154	4.20248	1.2407	4.09125	1.32052
3	4.13223	0.00916	4.11455	1.23321	4.10182	1.32822
4	4.11156	0.00714	4.12533	1.26274	3.99886	1.30716
5	4.02433	5.38969e-06	3.95476	1.25204	4.03922	1.30091
6	4.10677	0.000837013	3.94082	1.27949	3.95348	1.26554
7	4.02462	0.01478	3.94631	1.23178	4.12453	1.33974
8	4.02785	5.4437e-06	4.11525	1.23026	3.85726	1.24863
9	4.12019	5.42245e-06	4.2498	1.30812	3.92167	1.26002
10	4.22956	0.00327	3.96037	1.27236	4.03433	1.36545
11	3.9907	0.00422	4.1451	1.33661	4.11525	1.35122
12	3.84806	5.27657e-06	4.18279	1.38461	4.05136	1.25065
13	3.89831	0.000554577	4.09277	1.27362	4.01861	1.2614
14	4.04725	0.01771	4.00916	1.32893	3.85546	1.2749
15	3.97308	5.36879e-06	4.15592	1.38173	4.11096	1.33483
16	3.99343	5.42196e-06	4.0892	1.25597	3.97256	1.33125
17	4.12804	0.0181	4.15769	1.34451	4.19109	1.37497
18	4.02134	0.00745	4.12506	1.3005	3.95274	1.40679
19	4.22337	5.5807e-05	4.12685	1.3773	3.88928	1.32986
20	3.9756	0.04322	3.8744	1.282	3.92137	1.3012
21	4.13902	5.41306e-06	4.07925	1.22421	4.03366	1.32938
22	3.91762	0.00885	4.20753	1.2963	3.86569	1.25514
23	4.26374	5.70865e-06	4.29394	1.29779	4.00075	1.37941
24	4.06015	5.64479e-06	4.20937	1.26723	4.17167	1.39635
25	4.00898	5.35222e-06	4.19603	1.30112	4.07053	1.27182
26	3.91354	0.02671	4.06861	1.27994	4.04022	1.37278
27	4.08256	0.03233	4.24701	1.35956	4.07312	1.33968
28	4.13728	0.0329	3.94922	1.31469	3.98863	1.3387
29	3.93633	0.00174	3.88791	1.24515	3.91019	1.42668
30	4.2669	0.00325	4.14846	1.26485	3.88888	1.38544
31	4.22938	0.01607	3.99593	1.25992	3.76483	1.21273
32	4.10037	5.40051e-06	4.07292	1.17899	4.06484	1.32774
33	3.93206	5.30465e-06	4.11596	1.24568	4.03101	1.35464
34	4.04122	0.00689	4.04402	1.29412	4.02554	1.31556
35	3.99094	0.00952	3.92001	1.23484	3.93073	1.33507
36	3.9894	5.34451e-06	4.09531	1.30272	4.05223	1.35906
37	4.13069	5.53403e-06	3.99846	1.2783	4.0628	1.39831
38	3.72272	0.02222	3.90588	1.20286	3.98305	1.37337
39	4.02347	5.59854e-06	4.19466	1.36129	4.13656	1.42788
40	4.05105	5.49315e-06	3.82631	1.22302	4.02276	1.39319
41	4.06985	5.38729e-06	4.05653	1.24916	4.11307	1.40421
42	4.09789	0.01033	4.00165	1.30292	3.93207	1.30451
43	4.1901	0.02122	4.04822	1.25522	4.03952	1.41804
44	3.94773	0.00484	4.09264	1.39661	4.09137	1.32304
45	4.00807	0.01096	4.08498	1.27332	4.13135	1.30292
46	4.28313	5.59365e-06	4.01037	1.24511	4.02455	1.29262
47	4.01624	5.46872e-06	4.10508	1.28716	4.08062	1.36676
48	4.14173	5.53605e-06	3.98731	1.27521	4.05968	1.345
49	3.99993	0.02118	4.16844	1.36472	4.10025	1.39724
50	4.36488	5.67641e-06	4.11326	1.35652	4.14908	1.36383
51	4.194	5.58131e-06	4.11003	1.32421	4.1574	1.3849
52	4.14936	0.00915	4.03587	1.3077	4.03832	1.27487
53	3.92553	0.00433	3.97418	1.28473	4.10198	1.32708
54	4.10606	5.48641e-06	3.94017	1.27598	4.08338	1.40137
55	3.93495	5.26712e-06	4.02962	1.32195	4.17055	1.36214
56	4.04927	0.00158	3.99738	1.3306	4.22025	1.4044
57	4.06077	0.00494	3.96822	1.24621	3.97714	1.31956
58	3.96029	0.02453	4.02013	1.28085	4.10322	1.33323
59	4.15757	5.50525e-06	4.02133	1.30115	4.10642	1.35559
60	3.86806	5.30591e-06	4.09471	1.34388	3.97455	1.3911
61	4.14629	5.46175e-06	4.1309	1.32133	3.95344	1.36075
62	4.13273	0.01929	4.23648	1.34018	3.95335	1.36782
63	4.14864	5.49457e-06	4.13973	1.29536	4.16066	1.44374
64	4.19589	5.57318e-06	4.04139	1.31471	3.97653	1.30741
65	3.94243	5.22947e-06	4.12711	1.27521	4.00968	1.43629
66	4.11427	0.01719	4.14117	1.30323	4.16919	1.39092
67	4.13779	0.00882	4.02414	1.18875	3.97798	1.42384
68	3.92455	5.40531e-06	3.99473	1.21492	4.03091	1.33401
69	4.01827	0.02288	4.19349	1.26355	4.05236	1.31807
70	4.08511	0.00228	4.00983	1.20951	4.00455	1.36331
71	3.89085	5.32537e-06	4.1229	1.32512	3.89586	1.23236
72	4.07689	5.19519e-06	4.0271	1.27815	3.88672	1.29585
73	4.13278	5.44692e-06	4.10038	1.26817	3.99042	1.37502
74	4.07607	5.45507e-06	4.22463	1.26324	4.17005	1.49905
75	4.02707	5.31075e-06	3.94072	1.24107	4.20351	1.45842
76	4.19434	0.0019	4.20238	1.32895	3.97957	1.29177
77	4.05777	0.00401	4.13614	1.27583	4.13851	1.32526
78	3.93693	5.35037e-06	3.95121	1.3204	3.97661	1.27721
79	4.03515	0.000685278	4.03815	1.23256	3.92918	1.34329
80	3.9425	5.30021e-06	4.17181	1.25171	3.88182	1.24688
81	3.95476	0.01188	4.26485	1.37695	3.98033	1.44963
82	4.09305	5.29804e-06	4.1224	1.26756	3.79663	1.26263
83	3.99729	5.40262e-06	3.94342	1.22969	4.01506	1.39879
84	4.04778	5.53449e-06	4.23734	1.25179	4.1135	1.32805
85	4.04827	5.40998e-06	4.12791	1.28675	4.06237	1.29915
86	3.99657	5.41972e-06	4.17543	1.32525	3.79907	1.32369
87	4.18718	5.66792e-06	4.17846	1.2815	3.99782	1.30661
88	4.00998	0.0078	3.88931	1.28041	4.12504	1.37543
89	4.00631	0.00827	4.07824	1.2654	4.07037	1.38473
90	4.14723	5.66426e-06	3.95273	1.25571	3.94961	1.33374
91	3.89468	0.02596	4.1209	1.29968	4.2408	1.33893
92	4.03229	5.38061e-06	4.06688	1.32251	4.15303	1.26955
93	4.18737	0.03892	4.11086	1.32414	4.10607	1.32073
94	4.04655	0.01868	4.138	1.23927	3.8867	1.27771
95	3.9185	5.26501e-06	4.0001	1.31426	4.09796	1.36502
96	3.86844	5.40891e-06	3.86961	1.31746	4.00118	1.36719
97	4.06148	0.01782	3.81634	1.21592	3.93975	1.29591
98	3.89426	0.00255	4.22016	1.34021	4.14297	1.36153
99	4.0255	0.00663	4.11324	1.31568	3.86172	1.24939
100	3.70422	5.06937e-06	4.1366	1.31218	4.06583	1.34456
101	4.10067	0.01614	4.12443	1.26881	4.12443	1.26881
102	4.02929	5.49826e-06	4.00392	1.19566	4.00392	1.19566
103	4.01624	5.57526e-06	4.19793	1.32724	4.19793	1.32724
104	4.12422	5.65687e-06	3.99635	1.28373	3.99635	1.28373
105	4.12859	5.54767e-06	4.053	1.28492	4.053	1.28492
106	3.99403	5.19686e-06	4.17273	1.2728	4.22872	1.30043
107	4.2758	0.000833831	3.94736	1.25724	3.90214	1.31435
108	4.12925	0.00915	4.07058	1.28454	4.30411	1.32625
109	3.96327	0.00592	4.03379	1.24961	3.97067	1.30045
110	4.15045	0.01206	3.9573	1.30275	3.92723	1.27039
111	4.13706	5.63746e-06	4.09987	1.27438	3.72238	1.345
112	4.03026	5.36652e-06	4.14905	1.10845	4.22155	1.37909
113	4.37795	5.79776e-06	4.00418	1.18483	3.81447	1.19181
114	4.15851	0.02545	4.20749	1.24192	4.29599	1.47479
115	3.99705	5.43917e-06	4.04312	1.23507	4.04716	1.15345
116	3.98449	0.00144	3.90954	1.31026	3.80628	1.27125
117	4.25944	0.04315	4.15621	1.38167	4.05729	1.13101
118	3.97879	0.01115	4.14637	1.25536	4.00707	1.37691
119	3.88405	5.37452e-06	4.39252	1.28439	3.89375	1.34256
120	4.09594	5.46347e-06	3.91051	1.29071	4.04779	1.28194
121	3.93947	0.04109	4.2165	1.34601	3.82799	1.20838
122	4.34033	0.02286	4.00821	1.36117	3.98011	1.29721
123	3.90663	5.55816e-06	3.87675	1.22531	4.07378	1.16405
124	3.98374	0.00196	3.97472	1.29671	3.90099	1.30416
125	4.05105	5.48971e-06	4.06631	1.39798	4.03843	1.34981
126	3.92816	5.34231e-06	3.72009	1.20624	4.28405	1.37817
127	4.1055	0.00165	3.99017	1.18901	3.81071	1.26868
128	4.40132	0.05103	4.25347	1.39205	3.82923	1.21436
129	3.83318	0.03264	4.005	1.34822	3.87217	1.3125
130	3.95048	0.00145	3.97921	1.33716	4.00175	1.29689
131	4.14988	0.02018	4.09018	1.39394	3.87588	1.3171
132	3.90175	0.02917	4.26955	1.40267	4.02232	1.35366
133	4.2691	5.72116e-06	3.83122	1.22655	4.18931	1.3651
134	4.07352	6.72556e-06	4.08279	1.22199	4.19243	1.31018
135	4.24274	0.03898	4.41802	1.30246	4.13809	1.38007
136	3.97859	0.01756	4.10588	1.12164	4.1036	1.23321
137	4.27075	0.00387	3.97667	1.35779	4.0604	1.37361
138	3.81291	5.27296e-06	4.05557	1.20337	3.95189	1.35093
139	4.33153	5.7286e-06	4.05808	1.22001	3.86158	1.35705
140	3.99652	0.03358	3.89033	1.34672	4.22169	1.48115
141	3.87637	5.56204e-06	4.13405	1.282	3.99974	1.43925
142	3.99109	5.54784e-06	4.33016	1.20531	4.00434	1.29463
143	4.38162	0.02323	3.76794	1.0788	4.33529	1.45048
144	3.8653	5.39614e-06	4.12272	1.29022	4.15337	1.43606
145	4.19574	5.69587e-06	3.89329	1.23987	4.10877	1.33782
146	3.95844	5.46199e-06	4.14641	1.21452	4.21722	1.3877
147	3.84714	0.05241	3.93325	1.29739	4.11216	1.43515
148	4.22215	5.78787e-06	3.82004	1.17606	4.07927	1.23142
149	3.95342	5.4224e-06	3.9781	1.22761	3.92589	1.33901
150	3.8594	0.04008	4.12339	1.22411	3.90096	1.30254
151	4.13764	0.00757	3.963	1.20093	4.1243	1.31759
152	4.16246	0.02524	4.08898	1.28573	3.79624	1.30224
153	4.00929	5.45859e-06	3.93688	1.24141	3.7215	1.32637
154	3.97867	0.00015016	4.15753	1.24697	3.85113	1.18832
155	3.76732	0.00722	4.32143	1.46292	4.09335	1.38079
156	4.17797	0.01221	4.18772	1.3834	3.76383	1.22764
157	3.88123	0.02766	3.83197	1.30016	3.78918	1.35635
158	3.97658	0.0177	4.41267	1.44016	4.06744	1.3891
159	4.32732	5.67938e-06	4.0223	1.19826	3.83129	1.25544
160	3.92722	0.02743	3.97819	1.38589	3.75392	1.3124
161	4.00558	5.49269e-06	4.09603	1.25682	4.3252	1.48921
162	4.27981	5.65861e-06	4.55208	1.38916	3.75827	1.30835
163	3.9345	5.43121e-06	4.09542	1.3426	4.28078	1.26274
164	4.15861	5.72758e-06	3.98955	1.29191	3.78354	1.35818
165	4.00074	0.03991	3.83261	1.21122	3.97697	1.29987
166	4.11429	5.44961e-06	3.96428	1.23644	4.01803	1.27971
167	4.11273	5.53945e-06	4.00454	1.28417	3.99135	1.28415
168	3.88365	5.279e-06	3.86858	1.23161	3.91799	1.24773
169	4.06282	5.6279e-06	4.17594	1.26877	3.99127	1.38079
170	4.00609	5.55272e-06	3.84959	1.32158	3.9282	1.46379
171	3.68027	5.30197e-06	4.22886	1.34254	4.01484	1.3245
172	3.91101	0.03558	4.16284	1.22266	4.25544	1.34959
173	4.09456	0.01476	4.08596	1.34158	4.24346	1.37726
174	3.979	0.00433	3.9304	1.27389	3.84054	1.2386
175	4.0647	0.00579	4.00614	1.23037	4.10916	1.36412
176	4.11954	5.50835e-06	4.43157	1.27296	3.96354	1.26
177	4.16276	0.01484	4.2148	1.20131	3.86596	1.23792
178	4.16116	5.86642e-06	3.90806	1.19765	3.9267	1.34867
179	3.88961	5.34387e-06	3.96886	1.14139	4.31582	1.33471
180	4.09377	0.03343	4.27343	1.23011	4.03305	1.27167
181	4.02511	5.39124e-06	3.88729	1.30363	3.9931	1.35972
182	3.92095	5.23459e-06	4.00827	1.25194	4.1205	1.40785
183	4.00405	5.45395e-06	4.05826	1.2511	3.99507	1.17469
184	3.99533	5.50621e-06	3.89992	1.21784	4.1674	1.44575
185	3.96464	5.41555e-06	4.1775	1.11706	4.26955	1.33364
186	4.29988	5.63046e-06	3.94617	1.23395	3.97337	1.27934
187	3.82752	0.01348	4.19392	1.41924	4.25423	1.31897
188	4.26577	5.75613e-06	4.1365	1.26986	4.19305	1.41268
189	3.93043	0.00492	4.07739	1.28199	3.97231	1.14623
190	3.8984	5.41372e-06	4.03698	1.35935	3.9337	1.34838
191	3.98979	0.0074	3.90574	1.17423	4.54827	1.41184
192	3.88113	5.25307e-06	4.11734	1.23646	3.8187	1.28867
193	4.4889	0.02435	4.0793	1.19749	4.31429	1.45014
194	3.85748	5.32093e-06	3.90953	1.35142	4.3232	1.39712
195	3.97307	0.01501	4.27145	1.13472	3.86629	1.33685
196	3.76013	0.0042	3.90524	1.28747	4.26553	1.29275
197	4.01992	0.03608	4.18615	1.40053	4.30934	1.42516
198	4.01453	5.28451e-06	4.15679	1.26586	4.18196	1.49018
199	4.19458	5.61157e-06	3.94375	1.16346	3.95171	1.40487
200	3.85475	4.99971e-06	3.99878	1.23831	3.99878	1.23831
201	4.32747	0.01737	4.04946	1.23463	4.04946	1.23463
202			4.14877	1.24405	4.14877	1.24405
203			4.17219	1.23563	4.17219	1.23563
204			4.04821	1.26415	4.04821	1.26415
205			4.33899	1.2614	4.33899	1.2614

## Sheet: LA-ICP-MS
Sample session 3	I/Al	Calculated I in mol.%			Sample session 2	I/Al	Calculated I in mol.%			Sample session 1	I/Al	Calculated I in mol.%
ISG wout I	0.00534	-0.0476559			ISG wout I	0.00575	-0.00945383			ISG wout I	0.00135338	-0.0137402		Used data points for calibration line during each session
ISG wout I	0.00491	-0.0487626			ISG wout I	0.00797	-0.00664092			ISG wout I	0.00130434	-0.013851
ISG-A with I	0.51578	1.26611			ISG-A with I	0.43392	1.17087			ISG-A with I	0.560939	1.25143
ISG-A with I	0.51894	1.27425			ISG-A with I	0.434	1.17578			ISG-A with I	0.565769	1.26235
ISG-B with I	0.55308	1.36212			ISG-B with I	0.45304	1.22294			ISG-B with I	0.614733	1.37305
ISG-B with I	0.54152	1.33236			ISG-B with I	0.47429	1.2741			ISG-B with I	0.61571	1.37526
C0-11-1	1.5295	3.87523			C35-1a-1	0.44605	1.16014			C35-2-1	0.576262	1.28607
C0-11-2	1.56834	3.97519			C35-1a-2	0.45562	1.1973			C35-2-2	0.566894	1.26489
C0-11-3	1.5183	3.8464			C35-1a-3	0.43569	1.16115			C35-2-3	0.57013	1.27221
C0-11-4	1.53232	3.88249			C35-1b-4	0.45086	1.17952			C35-2-4	0.611323	1.36534
C0-11-5	1.51801	3.84565			C35-1b-5	0.44475	1.18815			C35-2-5	0.624732	1.39566
C10-3-1	1.83718	4.66713			C30-1a-1	0.17021	0.430826			C30-2-1	0.899464	2.0168
C10-3-2	2.01569	5.12658			C30-1a-2	0.16684	0.435293			C30-2-2	0.901644	2.02173
C10-3-3	1.88302	4.78512			C30-1a-3	0.1719	0.449509			C30-2-3	0.846426	1.89688
C10-3-4	2.01434	5.12311			C30-1a-4	0.17312	0.44918			C30-2-4	0.911219	2.04338
C10-3-5	2.03302	5.17119			C30-1a-5	0.17236	0.444261			C30-2-5	0.908274	2.03672
C20-3-1	0.97416	2.44589			C20-1-1	0.16634	0.424094			C0-2-1	2.86295	6.45604
C20-3-2	0.97275	2.44226			C20-1-2	0.17039	0.434083			C0-2-2	2.43264	5.48315
C20-3-3	0.96985	2.4348			C20-1-3	0.17426	0.445721			C0-2-3	2.78565	6.28128
C20-3-4	0.97623	2.45122			C20-1-4	0.1778	0.442973			C0-2-4	2.36187	5.32315
C20-3-5	0.99316	2.4948			C20-1-5	0.17678	0.45369			C0-2-5	2.29916	5.18138
ISG wout I	0.01555	-0.0213774			ISG wout I	0.00959	5.82343e-05			ISG wout I	0.0234024	0.0361106
ISG-A with I	0.53685	1.32034			ISG-A with I	0.4935	1.33931			ISG-A with I	0.567522	1.26631
ISG-B with I	0.54748	1.3477			ISG-B with I	0.52244	1.41272			ISG-B with I	0.605791	1.35283
C35-33-1	0.51898	1.27435			C10-1-1	0.59729	1.6259
C35-33-2	0.54808	1.34925			C10-1-2	0.59934	1.61727
C35-33-3	0.52132	1.28037			C10-1-3	0.599	1.63192
C35-33-4	0.5305	1.304			C10-1-4	0.60401	1.64693
C35-33-5	0.51916	1.27481			C10-1-5	0.61406	1.67244
C20-22-1-1	1.83554	4.66291			C20-2a-1	1.77201	4.65249
C20-22-1-2	1.8044	4.58276			C20-2a-2	1.70673	4.70256
C20-22-1-3	1.78207	4.52529			C20-2b-3	1.70966	4.69624
C20-22-1-4	1.80699	4.58943			C20-2b-4	1.7243	4.77333
C20-22-1-5	1.81658	4.61411			C20-2b-5	1.74098	4.74574
C20-22-2-1	1.76048	4.46972			ISG wout I	0.02001	0.0277937
C20-22-2-2	1.7736	4.50349			ISG wout I	0.01647	0.0182881
C20-22-2-3	1.78711	4.53826			ISG-A with I	0.48596	1.31068
C20-22-2-4	1.79998	4.57139			ISG-B with I	0.51882	1.40038
C20-22-2-5	1.80744	4.59059			C10-2a-1	2.02895	5.54808
ISG wout I	0.02527	0.00363993			C10-2a-2	2.02209	5.60769
ISG-A with I	0.51106	1.25397			C10-2a-3	1.91533	5.37403
ISG-B with I	0.54247	1.33481			C10-2a-4	1.98418	5.42577
C20-22-3-1	1.7978	4.56578			C10-2a-5	1.99296	5.44237
C20-22-3-2	1.82463	4.63483			ISG wout I	0.0195	0.0271329
C20-22-3-3	1.81933	4.62119			ISG-A with I	0.49589	1.35075
C20-22-3-4	1.82249	4.62932			ISG-B with I	0.52737	1.43489
C20-22-3-5	1.81075	4.59911
C20-22-4-1	1.85573	4.71488
C20-22-4-2	1.82803	4.64358
C20-22-4-3	1.85317	4.70829
C20-22-4-4	1.87553	4.76584
C20-22-4-5	1.85406	4.71058
C20-22-5-1	1.87443	4.76301
C20-22-5-2	1.86999	4.75158
C20-22-5-3	1.84937	4.69851
C20-22-5-4	1.85268	4.70703
C20-22-5-5	1.85851	4.72203
ISG wout I	0.03339	0.0245392
ISG-A with I	0.50387	1.23546
ISG-B with I	0.5451	1.34158
C20-22-6-1	1.79426	4.55667
C20-22-6-2	1.80089	4.57373
C20-22-6-3	1.79773	4.5656
C20-22-6-4	1.79596	4.56104
C20-22-6-5	1.86665	4.74298
C20-22-7-1	1.79104	4.54838
C20-22-7-2	1.78222	4.52568
C20-22-7-3	1.76932	4.49248
C20-22-7-4	1.81388	4.60716
C20-22-7-5	1.8303	4.64943
C20-22-8-1	1.78579	4.53487
C20-22-8-2	1.80463	4.58336
C20-22-8-3	1.8368	4.66616
C20-22-8-4	1.82695	4.6408
C20-22-8-5	1.83603	4.66417
C20-22-8-6	1.83048	4.64989
C20-22-9-1	1.83316	4.65679
C20-22-10-1	1.84223	4.68013
C20-22-10-2	1.88475	4.78957
C20-22-10-3	1.85107	4.70288
C20-22-11-1	1.84114	4.67733
C20-22-11-2	1.84506	4.68742
C20-22-11-3	1.85897	4.72322
ISG wout I	0.04641	0.0580501
ISG-A with I	0.53941	1.32693
ISG-B with I	0.5498	1.35368

## Sheet: C0 XPS spectra
C0-11							C0-2
BE (eV)	Spectra	I5+	I-	background	simulation		BE (eV)	Spectra	I5+	I-	I0	background	simulation
643.489	10590.7	9590.82	9590.73	9590.73	10090.8		647.067	13522.3	10873.5	10872.6	10872.3	10872.3	12123.7
643.389	10549.8	9549.88	9549.8	9549.8	10049.9		646.967	13462.7	10813.8	10812.9	10812.7	10812.7	12064.1
643.289	10518.5	9518.55	9518.47	9518.47	10018.5		646.867	13443	10794.2	10793.2	10793	10793	12044.4
643.189	10489.7	9489.75	9489.67	9489.67	9989.75		646.767	13501.3	10852.5	10851.6	10851.4	10851.3	12102.8
643.089	10473.6	9473.69	9473.6	9473.6	9973.69		646.667	13427	10778.2	10777.2	10777	10777	12028.4
642.989	10469.4	9469.49	9469.4	9469.4	9969.49		646.567	13420.3	10771.5	10770.6	10770.4	10770.3	12021.8
642.889	10429.1	9429.16	9429.07	9429.07	9929.16		646.467	13435	10786.2	10785.2	10785	10785	12036.5
642.789	10427.9	9428.03	9427.93	9427.93	9928.03		646.367	13419	10770.2	10769.2	10769	10769	12020.5
642.689	10425.3	9425.43	9425.33	9425.33	9925.43		646.267	13424	10775.2	10774.2	10774	10774	12025.5
642.589	10447	9447.09	9447	9447	9947.09		646.167	13473.3	10824.6	10823.6	10823.4	10823.3	12074.8
642.489	10417.7	9417.76	9417.67	9417.67	9917.76		646.067	13433	10784.3	10783.3	10783	10783	12034.5
642.389	10399.5	9399.63	9399.53	9399.53	9899.63		645.967	13349.7	10700.9	10699.9	10699.7	10699.7	11951.2
642.289	10429.3	9429.43	9429.33	9429.33	9929.43		645.867	13457.3	10808.6	10807.6	10807.4	10807.3	12058.9
642.189	10404.9	9405.03	9404.93	9404.93	9905.03		645.767	13444.3	10795.6	10794.6	10794.4	10794.3	12045.9
642.089	10416.1	9416.23	9416.13	9416.13	9916.23		645.667	13318.7	10670	10668.9	10668.7	10668.7	11920.3
641.989	10389.3	9389.37	9389.27	9389.27	9889.37		645.567	13362	10713.3	10712.3	10712	10712	11963.6
641.889	10381.5	9381.64	9381.53	9381.53	9881.64		645.467	13364	10715.3	10714.3	10714	10714	11965.6
641.789	10381.4	9381.51	9381.4	9381.4	9881.51		645.367	13326.3	10677.7	10676.6	10676.4	10676.3	11928
641.689	10364.7	9364.77	9364.67	9364.67	9864.77		645.267	13303	10654.4	10653.3	10653	10653	11904.7
641.589	10375.4	9375.51	9375.4	9375.4	9875.51		645.167	13381.7	10733.1	10731.9	10731.7	10731.7	11983.3
641.489	10359.4	9359.51	9359.4	9359.4	9859.51		645.067	13337.3	10688.7	10687.6	10687.4	10687.3	11939
641.389	10350.5	9350.65	9350.53	9350.53	9850.65		644.967	13348	10699.4	10698.3	10698	10698	11949.7
641.289	10346	9346.11	9346	9346	9846.11		644.867	13231.7	10583.1	10581.9	10581.7	10581.7	11833.4
641.189	10340.9	9340.98	9340.87	9340.87	9840.98		644.767	13262.3	10613.8	10612.6	10612.4	10612.3	11864.1
641.089	10379.8	9379.92	9379.8	9379.8	9879.92		644.667	13269.7	10621.1	10620	10619.7	10619.7	11871.4
640.989	10321.1	9321.19	9321.07	9321.07	9821.19		644.567	13168.3	10519.8	10518.6	10518.4	10518.3	11770.1
640.889	10313.8	9313.92	9313.8	9313.8	9813.92		644.467	13200.7	10552.2	10551	10550.7	10550.7	11802.5
640.789	10354.7	9354.79	9354.67	9354.67	9854.79		644.367	13223.7	10575.2	10574	10573.7	10573.7	11825.5
640.689	10331.1	9331.19	9331.07	9331.07	9831.19		644.267	13203.7	10555.2	10554	10553.7	10553.7	11805.5
640.589	10349.3	9349.46	9349.33	9349.33	9849.46		644.167	13236	10587.6	10586.3	10586	10586	11837.9
640.489	10343.1	9343.26	9343.13	9343.13	9843.26		644.067	13257.3	10608.9	10607.6	10607.4	10607.3	11859.2
640.389	10296.6	9296.73	9296.6	9296.6	9796.73		643.967	13191	10542.6	10541.3	10541	10541	11792.9
640.289	10292	9292.13	9292	9292	9792.13		643.867	13192	10543.6	10542.3	10542	10542	11793.9
640.189	10331.1	9331.2	9331.07	9331.07	9831.2		643.767	13217	10568.6	10567.3	10567	10567	11819
640.089	10331.3	9331.4	9331.27	9331.27	9831.4		643.667	13143.7	10495.3	10494	10493.7	10493.7	11745.7
639.989	10325.2	9325.34	9325.2	9325.2	9825.34		643.567	13056.3	10408	10406.7	10406.4	10406.3	11658.4
639.889	10350.7	9350.87	9350.73	9350.73	9850.87		643.467	13124.7	10476.4	10475	10474.7	10474.7	11726.7
639.789	10296.9	9297.08	9296.93	9296.93	9797.08		643.367	13103	10454.7	10453.3	10453	10453	11705.1
639.689	10291.1	9291.28	9291.13	9291.13	9791.28		643.267	13118.3	10470.1	10468.7	10468.4	10468.3	11720.4
639.589	10296.3	9296.41	9296.27	9296.27	9796.41		643.167	13066	10417.8	10416.3	10416	10416	11668.1
639.489	10269.5	9269.62	9269.47	9269.47	9769.62		643.067	13122.3	10474.1	10472.7	10472.4	10472.3	11724.5
639.389	10295.9	9296.02	9295.87	9295.87	9796.02		642.967	13072	10423.8	10422.3	10422	10422	11674.2
639.289	10267.6	9267.75	9267.6	9267.6	9767.75		642.867	13044.3	10396.2	10394.7	10394.4	10394.3	11646.5
639.189	10277.2	9277.36	9277.2	9277.2	9777.36		642.767	13005	10356.9	10355.3	10355	10355	11607.2
639.089	10222.9	9223.09	9222.93	9222.93	9723.09		642.667	13059	10410.9	10409.3	10409	10409	11661.3
638.989	10273.1	9273.23	9273.07	9273.07	9773.23		642.567	13032	10383.9	10382.4	10382	10382	11634.3
638.889	10241.6	9241.76	9241.6	9241.6	9741.76		642.467	12892.3	10244.3	10242.7	10242.4	10242.3	11494.6
638.789	10259.3	9259.5	9259.33	9259.33	9759.5		642.367	12850.7	10202.6	10201	10200.7	10200.7	11453
638.689	10232.2	9232.37	9232.2	9232.2	9732.37		642.267	12896	10248	10246.4	10246	10246	11498.4
638.589	10228.3	9228.51	9228.33	9228.33	9728.51		642.167	12921.3	10273.3	10271.7	10271.4	10271.3	11523.7
638.489	10273	9273.18	9273	9273	9773.18		642.067	12925.3	10277.4	10275.7	10275.4	10275.3	11527.8
638.389	10250.7	9250.84	9250.67	9250.67	9750.84		641.967	12940	10292.1	10290.4	10290	10290	11542.5
638.289	10224.9	9225.11	9224.93	9224.93	9725.11		641.867	12897.3	10249.4	10247.7	10247.4	10247.3	11499.8
638.189	10253.7	9253.92	9253.73	9253.73	9753.92		641.767	12858.3	10210.5	10208.7	10208.4	10208.3	11460.9
638.089	10237.8	9237.99	9237.8	9237.8	9737.99		641.667	12871.3	10223.5	10221.7	10221.4	10221.3	11473.9
637.989	10243.2	9243.39	9243.2	9243.2	9743.39		641.567	12888.3	10240.5	10238.7	10238.4	10238.3	11490.9
637.889	10215.3	9215.53	9215.33	9215.33	9715.53		641.467	12905.7	10257.9	10256.1	10255.7	10255.7	11508.3
637.789	10219.3	9219.53	9219.33	9219.33	9719.53		641.367	12910.7	10262.9	10261.1	10260.7	10260.7	11513.3
637.689	10225	9225.2	9225	9225	9725.2		641.267	12840	10192.3	10190.4	10190	10190	11442.7
637.589	10249.9	9250.14	9249.93	9249.93	9750.14		641.167	12783.3	10135.6	10133.7	10133.4	10133.3	11386.1
637.489	10264	9264.21	9264	9264	9764.21		641.067	12748.3	10100.7	10098.7	10098.4	10098.3	11351.1
637.389	10223.8	9224.01	9223.8	9223.8	9724.01		640.967	12726.7	10079	10077.1	10076.7	10076.7	11329.5
637.289	10222.1	9222.35	9222.13	9222.13	9722.35		640.867	12733.3	10085.7	10083.8	10083.4	10083.3	11336.2
637.189	10217.4	9217.62	9217.4	9217.4	9717.62		640.767	12800.3	10152.8	10150.8	10150.4	10150.3	11403.2
637.089	10231.3	9231.49	9231.27	9231.27	9731.49		640.667	12817.3	10169.8	10167.8	10167.4	10167.3	11420.3
636.989	10226.4	9226.63	9226.4	9226.4	9726.63		640.567	12781.7	10134.2	10132.1	10131.7	10131.7	11384.6
636.889	10249.4	9249.63	9249.4	9249.4	9749.63		640.467	12746	10098.5	10096.4	10096	10096	11349
636.789	10281.6	9281.83	9281.6	9281.6	9781.83		640.367	12625.7	9978.25	9976.11	9975.7	9975.67	11228.7
636.689	10267.5	9267.7	9267.47	9267.47	9767.7		640.267	12649	10001.6	9999.45	9999.03	9999	11252.1
636.589	10243.1	9243.31	9243.07	9243.07	9743.31		640.167	12793	10145.7	10143.5	10143	10143	11396.1
636.489	10266.5	9266.71	9266.47	9266.47	9766.71		640.067	12622	9974.7	9972.46	9972.03	9972	11225.2
636.389	10291.5	9291.78	9291.53	9291.53	9791.78		639.967	12627	9979.74	9977.46	9977.03	9977	11230.2
636.289	10344	9344.26	9344	9344	9844.26		639.867	12505.3	9858.12	9855.8	9855.37	9855.33	11108.6
636.189	10353.3	9353.6	9353.33	9353.33	9853.6		639.767	12438	9790.83	9788.47	9788.04	9788	11041.3
636.089	10401.1	9401.33	9401.07	9401.07	9901.33		639.667	12518.3	9871.21	9868.81	9868.37	9868.33	11121.7
635.989	10435.2	9435.47	9435.2	9435.2	9935.47		639.567	12590.7	9943.58	9941.15	9940.7	9940.67	11194.1
635.889	10445.4	9445.68	9445.4	9445.4	9945.68		639.467	12532.3	9885.29	9882.82	9882.37	9882.33	11135.8
635.789	10472.1	9472.42	9472.13	9472.13	9972.42		639.367	12468.7	9821.67	9819.16	9818.7	9818.67	11072.2
635.689	10516.7	9517.02	9516.73	9516.73	10017		639.267	12430.7	9783.72	9781.17	9780.7	9780.67	11034.3
635.589	10501.1	9501.36	9501.07	9501.07	10001.4		639.167	12545.3	9898.44	9895.84	9895.37	9895.33	11149
635.489	10522.1	9522.37	9522.07	9522.07	10022.4		639.067	12499	9852.16	9849.51	9849.04	9849	11102.7
635.389	10490.8	9491.11	9490.8	9490.8	9991.11		638.967	12576.7	9929.87	9927.19	9926.71	9926.67	11180.4
635.289	10469.6	9469.91	9469.6	9469.6	9969.91		638.867	12478	9831.26	9828.53	9828.04	9828	11081.8
635.189	10452.5	9452.78	9452.47	9452.47	9952.78		638.767	12476.3	9829.65	9826.87	9826.37	9826.33	11080.2
635.089	10416.3	9416.59	9416.27	9416.27	9916.59		638.667	12496.7	9850.04	9847.21	9846.71	9846.67	11100.6
634.989	10357.9	9358.2	9357.87	9357.87	9858.2		638.567	12536	9889.43	9886.55	9886.04	9886	11140
634.889	10339.9	9340.2	9339.87	9339.87	9840.2		638.467	12526.7	9880.15	9877.22	9876.71	9876.67	11130.8
634.789	10303.1	9303.41	9303.07	9303.07	9803.41		638.367	12538	9891.54	9888.56	9888.04	9888	11142.1
634.689	10322.9	9323.22	9322.87	9322.87	9823.22		638.267	12476	9829.6	9826.57	9826.04	9826	11080.2
634.589	10293.1	9293.49	9293.13	9293.13	9793.49		638.167	12590.3	9944	9940.91	9940.38	9940.33	11194.6
634.489	10315.3	9315.7	9315.33	9315.33	9815.7		638.067	12623.7	9977.39	9974.25	9973.71	9973.67	11228
634.389	10341.1	9341.44	9341.07	9341.07	9841.44		637.967	12571.3	9925.13	9921.92	9921.38	9921.33	11175.8
634.289	10332.4	9332.78	9332.4	9332.4	9832.78		637.867	12586	9939.86	9936.6	9936.05	9936	11190.5
634.189	10280.2	9280.59	9280.2	9280.2	9780.59		637.767	12692.3	10046.3	10042.9	10042.4	10042.3	11296.9
634.089	10326.2	9326.6	9326.2	9326.2	9826.6		637.667	12740.7	10094.7	10091.3	10090.7	10090.7	11345.3
633.989	10334.1	9334.47	9334.07	9334.07	9834.47		637.567	12749.3	10103.4	10100	10099.4	10099.3	11354.1
633.889	10308.3	9308.75	9308.33	9308.33	9808.75		637.467	12741	10095.1	10091.6	10091	10091	11345.8
633.789	10329.9	9330.36	9329.93	9329.93	9830.36		637.367	12736	10090.2	10086.6	10086	10086	11340.9
633.689	10351.1	9351.57	9351.13	9351.13	9851.57		637.267	12823.3	10177.6	10174	10173.4	10173.3	11428.3
633.589	10355.7	9356.18	9355.73	9355.73	9856.18		637.167	12938.7	10293	10289.3	10288.7	10288.7	11543.7
633.489	10372.7	9373.19	9372.73	9372.73	9873.19		637.067	13265	10619.4	10615.7	10615.1	10615	11870.2
633.389	10374.5	9375	9374.53	9374.53	9875		636.967	13396	10750.5	10746.7	10746.1	10746	12001.3
633.289	10368.6	9369.08	9368.6	9368.6	9869.08		636.867	13579.7	10934.3	10930.3	10929.7	10929.7	12185
633.189	10384.7	9385.16	9384.67	9384.67	9885.16		636.767	13991.7	11346.4	11342.4	11341.7	11341.7	12597.1
633.089	10419.2	9419.7	9419.2	9419.2	9919.7		636.667	14478.7	11833.5	11829.4	11828.7	11828.7	13084.2
632.989	10375.2	9375.71	9375.2	9375.2	9875.71		636.567	15054	12408.9	12404.7	12404.1	12404	13659.7
632.889	10415.7	9416.19	9415.67	9415.67	9916.19		636.467	15899.3	13254.3	13250.1	13249.4	13249.3	14505.1
632.789	10432	9432.53	9432	9432	9932.53		636.367	16767.7	14122.8	14118.4	14117.7	14117.7	15373.5
632.689	10432.3	9432.88	9432.33	9432.33	9932.88		636.267	17802.7	15157.9	15153.4	15152.7	15152.7	16408.7
632.589	10463.5	9464.02	9463.47	9463.47	9964.02		636.167	19336	16691.3	16686.7	16686.1	16686	17942.1
632.489	10536.9	9537.5	9536.93	9536.93	10037.5		636.067	20720.3	18075.7	18071.1	18070.4	18070.3	19326.6
632.389	10517.7	9518.25	9517.67	9517.67	10018.2		635.967	22271.3	19626.8	19622.1	19621.4	19621.3	20877.7
632.289	10547.3	9547.93	9547.33	9547.33	10047.9		635.867	23862	21217.6	21212.8	21212.1	21212	22468.5
632.189	10599.8	9600.42	9599.8	9599.8	10100.4		635.767	25010	22365.7	22360.8	22360.1	22360	23616.6
632.089	10682.6	9683.24	9682.6	9682.6	10183.2		635.667	26109.3	23465.2	23460.1	23459.4	23459.3	24716.1
631.989	10767.6	9768.25	9767.6	9767.6	10268.2		635.567	26469.7	23825.7	23820.5	23819.7	23819.7	25076.5
631.889	10825.3	9826	9825.33	9825.33	10326		635.467	26429.7	23785.8	23780.5	23779.7	23779.7	25036.7
631.789	10952.9	9953.55	9952.87	9952.87	10453.5		635.367	25651.3	23007.6	23002.2	23001.4	23001.3	24258.5
631.689	11156.4	10157.1	10156.4	10156.4	10657.1		635.267	24409.3	21765.7	21760.2	21759.4	21759.3	23016.6
631.589	11326.5	10327.2	10326.5	10326.5	10827.2		635.167	22941.3	20297.9	20292.2	20291.4	20291.3	21548.8
631.489	11575.1	10575.9	10575.1	10575.1	11075.9		635.067	21370.3	18727	18721.2	18720.4	18720.3	19978
631.389	11928.5	10929.2	10928.5	10928.5	11429.2		634.967	19672.3	17029.2	17023.2	17022.4	17022.3	18280.1
631.289	12280.3	11281.1	11280.3	11280.3	11781.1		634.867	18243	15600	15593.9	15593.1	15593	16850.9
631.189	12730.3	11731.1	11730.3	11730.3	12231.1		634.767	17041	14398.1	14391.9	14391.1	14391	15649.1
631.089	13101	12101.8	12101	12101	12601.8		634.667	15881	13238.3	13231.9	13231.1	13231	14489.3
630.989	13500.7	12501.5	12500.7	12500.7	13001.5		634.567	15145.3	12502.8	12496.3	12495.4	12495.3	13753.8
630.889	13907.1	12908	12907.1	12907.1	13408		634.467	14369.7	11727.3	11720.6	11719.7	11719.7	12978.3
630.789	14289.2	13290.1	13289.2	13289.2	13790.1		634.367	14007	11364.8	11358	11357.1	11357	12615.9
630.689	14488.4	13489.3	13488.4	13488.4	13989.3		634.267	13655.7	11013.7	11006.7	11005.7	11005.7	12264.7
630.589	14572.5	13573.4	13572.5	13572.5	14073.4		634.167	13339	10697.2	10690	10689.1	10689	11948.3
630.489	14540.5	13541.4	13540.5	13540.5	14041.4		634.067	13082	10440.4	10433	10432.1	10432	11691.5
630.389	14295.9	13296.9	13295.9	13295.9	13796.9		633.967	12876.3	10234.9	10227.4	10226.4	10226.3	11486.1
630.289	14087.7	13088.8	13087.7	13087.7	13588.8		633.867	12813.3	10172.2	10164.4	10163.4	10163.3	11423.3
630.189	13704.7	12705.8	12704.7	12704.7	13205.8		633.767	12754.3	10113.4	10105.4	10104.4	10104.3	11364.5
630.089	13234.1	12235.2	12234.1	12234.1	12735.2		633.667	12634.3	9993.59	9985.42	9984.42	9984.33	11244.8
629.989	12748.2	11749.3	11748.2	11748.2	12249.3		633.567	12550	9909.48	9901.11	9900.09	9900	11160.7
629.889	12322.8	11323.9	11322.8	11322.8	11823.9		633.467	12446	9805.73	9797.13	9796.09	9796	11057
629.789	11877.2	10878.4	10877.2	10877.2	11378.4		633.367	12296	9656.01	9647.14	9646.09	9646	10907.2
629.689	11560.6	10561.8	10560.6	10560.6	11061.8		633.267	12258.3	9618.61	9609.5	9608.43	9608.33	10869.9
629.589	11242.8	10244.1	10242.8	10242.8	10744.1		633.167	12162.3	9522.88	9513.52	9512.43	9512.33	10774.2
629.489	10988.1	9989.37	9988.07	9988.07	10489.4		633.067	12205.7	9566.49	9556.87	9555.77	9555.67	10817.8
629.389	10821.5	9822.89	9821.53	9821.53	10322.9		632.967	12106.7	9467.76	9457.89	9456.77	9456.67	10719.1
629.289	10684.5	9685.87	9684.47	9684.47	10185.9		632.867	12165.3	9526.75	9516.58	9515.44	9515.33	10778.1
629.189	10587.4	9588.85	9587.4	9587.4	10088.9		632.767	12156.7	9518.43	9507.93	9506.77	9506.67	10769.8
629.089	10491.4	9492.85	9491.4	9491.4	9992.85		632.667	12128.7	9490.77	9479.96	9478.78	9478.67	10742.2
628.989	10414.6	9416.1	9414.6	9414.6	9916.1		632.567	12129.7	9492.11	9480.98	9479.78	9479.67	10743.5
628.889	10369	9370.54	9369	9369	9870.54		632.467	12096.3	9459.12	9447.67	9446.45	9446.33	10710.6
628.789	10338.9	9340.53	9338.93	9338.93	9840.53		632.367	12067.3	9430.46	9418.69	9417.45	9417.33	10681.9
628.689	10340.7	9342.38	9340.73	9340.73	9842.38		632.267	12119.7	9483.22	9471.05	9469.78	9469.67	10734.7
628.589	10275.4	9277.11	9275.4	9275.4	9777.11		632.167	12167	9530.99	9518.41	9517.12	9517	10782.5
628.489	10249.3	9251.1	9249.33	9249.33	9751.1		632.067	12073.3	9437.76	9424.77	9423.46	9423.33	10689.3
628.389	10267.7	9269.56	9267.73	9267.73	9769.56		631.967	12054	9418.87	9405.46	9404.13	9404	10670.5
628.289	10233.5	9235.42	9233.53	9233.53	9735.42		631.867	12115.7	9480.97	9467.16	9465.79	9465.67	10732.6
628.189	10237.3	9239.29	9237.33	9237.33	9739.29		631.767	12145.7	9511.41	9497.19	9495.8	9495.67	10763.1
628.089	10199.5	9201.5	9199.47	9199.47	9701.5		631.667	12266.3	9632.63	9617.88	9616.47	9616.33	10884.3
627.989	10169.6	9171.7	9169.6	9169.6	9671.7		631.567	12293	9659.87	9644.58	9643.14	9643	10911.6
627.889	10212.4	9214.58	9212.4	9212.4	9714.58		631.467	12340.7	9708.11	9692.27	9690.81	9690.67	10959.9
627.789	10205.5	9207.79	9205.53	9205.53	9707.79		631.367	12465.3	9833.34	9816.97	9815.48	9815.33	11085.1
627.689	10194.3	9196.68	9194.33	9194.33	9696.68		631.267	12619	9987.58	9970.67	9969.15	9969	11239.4
627.589	10171.5	9173.97	9171.53	9171.53	9673.97		631.167	12854.7	10223.8	10206.4	10204.8	10204.7	11475.7
627.489	10112.1	9114.6	9112.07	9112.07	9614.6		631.067	13239	10608.9	10590.7	10589.2	10589	11860.8
627.389	10100.3	9102.89	9100.27	9100.27	9602.89		630.967	13618	10988.7	10969.8	10968.2	10968	12240.6
627.289	10094.1	9096.87	9094.13	9094.13	9596.87		630.867	13942.7	11314.1	11294.5	11292.8	11292.7	12566.1
627.189	10102.7	9105.51	9102.67	9102.67	9605.51		630.767	14371.7	11743.9	11723.5	11721.8	11721.7	12995.9
627.089	10093.7	9096.69	9093.73	9093.73	9596.69		630.667	14791.7	12164.6	12143.6	12141.8	12141.7	13416.7
626.989	10087.2	9090.28	9087.2	9087.2	9590.28		630.567	15086.3	12460.1	12438.3	12436.5	12436.3	13712.2
626.889	10105.9	9109.07	9105.87	9105.87	9609.07		630.467	15253.7	12628.4	12605.6	12603.8	12603.7	13880.6
626.789	10112.5	9115.81	9112.47	9112.47	9615.81		630.367	15267.7	12643.5	12619.7	12617.8	12617.7	13895.7
626.689	10133.4	9136.88	9133.4	9133.4	9636.88		630.267	15242.3	12619.2	12594.4	12592.5	12592.3	13871.4
626.589	10106.7	9110.3	9106.67	9106.67	9610.3		630.167	14899.7	12277.6	12251.8	12249.9	12249.7	13529.9
626.489	10093.5	9097.33	9093.54	9093.53	9597.33		630.067	14655	12033.9	12007.1	12005.2	12005	13286.3
626.389	10100.9	9104.9	9100.95	9100.93	9604.91		629.967	14195.3	11575.4	11547.5	11545.5	11545.3	12827.8
626.289	10094.5	9098.67	9094.57	9094.53	9598.71		629.867	13795	11176.5	11147.2	11145.2	11145	12429
626.189	10077.4	9081.73	9077.48	9077.4	9581.81		629.767	13327	10710	10679.3	10677.2	10677	11962.5
626.089	10067.1	9071.6	9067.23	9067.07	9571.76		629.667	12962.7	10347.2	10315	10312.9	10312.7	11599.7
625.989	10058.9	9063.61	9059.2	9058.87	9563.95		629.567	12543	9928.96	9895.38	9893.22	9893	11181.6
625.889	10065.9	9070.9	9066.6	9065.93	9571.57		629.467	12216	9603.44	9568.44	9566.23	9566	10856.1
625.789	10039.7	9044.94	9041.01	9039.73	9546.22		629.367	12009.3	9398.42	9361.83	9359.57	9359.33	10651.2
625.689	10046.8	9056.47	9053.37	9051	9558.84		629.267	11811.3	9202.6	9163.89	9161.58	9161.33	10455.4
625.589	10066.5	9058.16	9056.69	9052.42	9562.43		629.167	11608.7	9002.11	8961.29	8958.92	8958.67	10255
625.489	10052.3	9059.87	9061.29	9053.84	9567.32		629.067	11494.3	8889.95	8847.01	8844.59	8844.33	10142.9
625.389	10061.9	9061.6	9067.86	9055.25	9574.2		628.967	11519.7	8917.46	8872.41	8869.93	8869.67	10170.5
625.289	10062.5	9063.35	9077.33	9056.67	9584.01		628.867	11390.3	8790.3	8743.14	8740.61	8740.33	10043.4
625.189	10089.9	9065.12	9090.83	9058.09	9597.86		628.767	11302.3	8704.88	8655.22	8652.61	8652.33	9958.04
625.089	10150	9066.92	9109.64	9059.51	9617.05		628.667	11282.7	8688.59	8635.62	8632.96	8632.67	9941.84
624.989	10149.9	9068.75	9135.15	9060.92	9642.98		628.567	11192.7	8601.97	8545.7	8542.97	8542.67	9855.3
624.889	10193.9	9070.6	9168.32	9062.34	9676.58		628.467	11183.7	8595.19	8536.77	8533.97	8533.67	9848.61
624.789	10243.1	9072.49	9209.33	9063.76	9718.06		628.367	11156.3	8571.44	8509.51	8506.65	8506.33	9824.94
624.689	10267.5	9074.42	9257.16	9065.18	9766.4		628.267	11178	8597	8531.26	8528.33	8528	9850.59
624.589	10325.4	9076.39	9309.11	9066.59	9818.9		628.167	11213	8636.23	8566.35	8563.34	8563	9889.92
624.489	10356.1	9078.39	9360.4	9068.01	9870.78		628.067	11143	8570.84	8496.45	8493.35	8493	9824.64
624.389	10378.5	9080.45	9404.95	9069.43	9915.97		627.967	11203.3	8636.21	8556.87	8553.69	8553.33	9890.12
624.289	10430.1	9082.56	9436.41	9070.85	9948.12		627.867	11200.7	8615.18	8530.41	8527.15	8526.78	9869.19
624.189	10466.7	9084.73	9449.38	9072.27	9961.84		627.767	11126.3	8611.19	8520.45	8517.11	8516.73	9865.3
624.089	10477.9	9086.96	9442.1	9073.68	9955.37		627.667	11181.3	8607.7	8510.39	8506.97	8506.57	9861.93
623.989	10463.3	9089.26	9416.11	9075.1	9930.27		627.567	11140.7	8604.82	8500.25	8496.72	8496.31	9859.17
623.889	10381.5	9091.64	9376	9076.52	9891.12		627.467	11122.3	8602.62	8490.01	8486.38	8485.95	9857.11
623.789	10328	9094.11	9328.1	9077.94	9844.27		627.367	11132.3	8601.24	8479.67	8475.94	8475.49	9855.87
623.689	10309.7	9096.67	9278.77	9079.35	9796.09		627.267	11134.3	8600.82	8469.24	8465.4	8464.93	9855.58
623.589	10241.1	9099.35	9232.89	9080.77	9751.47		627.167	11140.7	8601.51	8458.7	8454.76	8454.28	9856.41
623.489	10219.8	9102.14	9193.56	9082.19	9713.52		627.067	11218	8603.53	8448.07	8444.03	8443.53	9858.57
623.389	10199.1	9105.08	9162.11	9083.61	9683.58		626.967	11268.3	8607.12	8437.38	8433.21	8432.7	9862.32
623.289	10187	9108.17	9138.35	9085.02	9661.49		626.867	11205	8612.59	8426.62	8422.31	8421.77	9867.96
623.189	10086.9	9111.43	9121.39	9086.44	9646.39		626.767	11193.7	8620.29	8415.76	8411.32	8410.76	9875.85
623.089	10115.1	9114.9	9110.03	9087.86	9637.06		626.667	11291	8630.7	8404.83	8400.25	8399.67	9886.44
622.989	10111.1	9118.58	9102.89	9089.28	9632.2		626.567	11328.7	8644.39	8393.81	8389.11	8388.5	9900.31
622.889	10079.9	9122.52	9098.78	9090.7	9630.61		626.467	11248.7	8662.12	8382.72	8377.88	8377.25	9918.22
622.789	10106.3	9126.76	9096.76	9092.11	9631.41		626.367	11348.3	8684.86	8371.58	8366.58	8365.93	9941.16
622.689	10100.5	9131.33	9096.13	9093.53	9633.93		626.267	11435.7	8713.85	8360.39	8355.22	8354.53	9970.39
622.589	10100	9136.29	9096.35	9094.95	9637.69		626.167	11448.3	8750.83	8349.14	8343.79	8343.08	10007.6
622.489	10103.9	9141.69	9097.1	9096.37	9642.43		626.067	11534	8798.14	8337.83	8332.31	8331.56	10055.2
622.389	10091.6	9147.61	9098.16	9097.78	9647.98		625.967	11628.3	8859.1	8326.46	8320.77	8319.98	10116.4
622.289	10113.3	9154.14	9099.39	9099.2	9654.32		625.867	11690.3	8938.39	8315.03	8309.18	8308.35	10195.9
622.189	10134.3	9161.36	9100.71	9100.62	9661.45		625.767	11804.3	9042.72	8303.59	8297.54	8296.67	10300.5
622.089	10131	9169.42	9102.08	9102.04	9669.46		625.667	11983.3	9181.81	8292.16	8285.86	8284.96	10439.9
621.989	10153.3	9178.46	9103.47	9103.45	9678.48		625.567	12163.3	9369.8	8280.7	8274.16	8273.21	10628.2
621.889	10162.2	9188.66	9104.88	9104.87	9688.67		625.467	12436.3	9626.41	8269.21	8262.45	8261.45	10885.2
621.789	10195.6	9200.26	9106.29	9106.29	9700.26		625.367	12816.7	9978.92	8257.72	8250.73	8249.67	11238
621.689	10147.3	9213.52	9107.71	9107.71	9713.52		625.267	13255	10463.2	8246.23	8238.99	8237.89	11722.6
621.589	10222.9	9228.8	9109.13	9109.13	9728.8		625.167	13989	11124.6	8234.76	8227.3	8226.14	12384.4
621.489	10226.1	9246.53	9110.54	9110.54	9746.53		625.067	14924.3	12011.9	8223.47	8215.67	8214.45	13272.2
621.389	10232.3	9267.26	9111.96	9111.96	9767.26		624.967	16117.7	13173.4	8212.26	8204.13	8202.84	14434.1
621.289	10262.1	9291.7	9113.38	9113.38	9791.7		624.867	17414.7	14644.3	8201.18	8192.73	8191.36	15905.4
621.189	10287.6	9320.74	9114.8	9114.8	9820.74		624.767	19034.7	16433.4	8190.28	8181.51	8180.06	17695.1
621.089	10315.1	9355.55	9116.21	9116.21	9855.55		624.667	21031	18503.4	8179.62	8170.54	8168.99	19765.6
620.989	10334.9	9397.63	9117.63	9117.63	9897.63		624.567	23201.7	20761.5	8169.27	8159.89	8158.24	22024.1
620.889	10411.8	9448.97	9119.05	9119.05	9948.97		624.467	25484	23057	8159.45	8149.63	8147.88	24320.3
620.789	10478.7	9512.17	9120.47	9120.47	10012.2		624.367	27640	25191.6	8150.15	8139.86	8137.98	26455.6
620.689	10565.6	9590.71	9121.88	9121.88	10090.7		624.267	29557.3	26946.4	8141.39	8130.64	8128.64	28211.2
620.589	10629.3	9689.18	9123.3	9123.3	10189.2		624.167	30817.7	28122.4	8133.26	8122.06	8119.91	29387.9
620.489	10786.9	9813.67	9124.72	9124.72	10313.7		624.067	31447.7	28577.6	8125.78	8114.15	8111.84	29843.8
620.389	10930.3	9972.18	9126.14	9126.14	10472.2		623.967	31042.7	28255.9	8119	8106.95	8104.46	29522.9
620.289	11187.9	10175	9127.56	9127.56	10675		623.867	29994.3	27200.8	8113.03	8100.45	8097.76	28468.8
620.189	11431.8	10434.8	9128.97	9128.97	10934.8		623.767	28303.7	25549.3	8107.89	8094.6	8091.69	26818.4
620.089	11780	10765.9	9130.39	9130.39	11265.9		623.667	26176.3	23494.7	8103.32	8089.37	8086.21	24764.9
619.989	12197.5	11182.4	9131.81	9131.81	11682.4		623.567	23939.7	21250.6	8098.93	8084.67	8081.23	22521.7
619.889	12733.6	11693.2	9133.23	9133.23	12193.2		623.467	21608	19015.1	8095.35	8080.45	8076.68	20287.6
619.789	13331.8	12294.6	9134.64	9134.64	12794.6		623.367	19484.7	16941.9	8092.2	8076.62	8072.49	18215.7
619.689	13966.1	12962.8	9136.06	9136.06	13462.8		623.267	17636.7	15127.2	8089.42	8073.12	8068.57	16402.6
619.589	14630.1	13652	9137.48	9137.48	14152		623.167	16240.3	13612.9	8086.94	8069.9	8064.87	14890
619.489	15248.1	14300.1	9138.9	9138.9	14800.1		623.067	14936	12398.3	8084.73	8066.93	8061.33	13677.3
619.389	15788.3	14844.4	9140.31	9140.31	15344.4		622.967	14043.7	11452.2	8082.77	8064.18	8057.92	12733.3
619.289	16278.3	15240.3	9141.73	9141.73	15740.3		622.867	13400.7	10730.2	8081.03	8061.64	8054.59	12013.7
619.189	16496.1	15465.7	9143.15	9143.15	15965.7		622.767	12884.3	10185.6	8079.5	8059.33	8051.34	11471.8
619.089	16596.4	15514.1	9144.57	9144.57	16014.1		622.667	12465	9776.51	8078.2	8057.27	8048.13	11065.7
618.989	16422.7	15386.7	9145.99	9145.99	15886.7		622.567	12215.7	9467.46	8077.12	8055.52	8044.97	10760.2
618.889	16100.2	15088.3	9147.4	9147.4	15588.3		622.467	12114.7	9231.21	8076.28	8054.15	8041.83	10528
618.789	15578.9	14631.1	9148.82	9148.82	15131.1		622.367	11958	9047.82	8075.72	8053.29	8038.73	10349.4
618.689	14934.2	14040.5	9150.24	9150.24	14540.5		622.267	11720.3	8903.07	8075.46	8053.11	8035.64	10210.4
618.589	14312.3	13360.5	9151.66	9151.66	13860.5		622.167	11642.3	8786.82	8075.53	8053.86	8032.57	10101.1
618.489	13648.8	12650.7	9153.07	9153.07	13150.7		622.067	11558	8691.78	8075.99	8055.86	8029.51	10014.6
618.389	12994	11974.6	9154.49	9154.49	12474.6		621.967	11472.3	8612.87	8076.88	8059.59	8026.46	9946.43
618.289	12413.6	11380.2	9155.91	9155.91	11880.2		621.867	11343	8546.45	8078.29	8065.6	8023.42	9893.5
618.189	11924.7	10888.9	9157.33	9157.33	11388.9		621.767	11372	8489.88	8080.3	8074.58	8020.38	9854
618.089	11539.8	10499.9	9158.74	9158.74	10999.9		621.667	11257.3	8441.17	8083.01	8087.25	8017.35	9826.72
617.989	11218.7	10200.1	9160.16	9160.16	10700.1		621.567	11209.7	8398.81	8086.56	8104.26	8014.32	9810.99
617.889	11028.7	9972.31	9161.58	9161.58	10472.3		621.467	11246.7	8361.67	8091.12	8126.1	8011.3	9806.3
617.789	10821.9	9800.04	9163	9163	10300		621.367	11214.7	8328.87	8096.92	8152.75	8008.27	9811.99
617.689	10683.5	9669.61	9164.42	9164.42	10169.6		621.267	11247.7	8299.69	8104.22	8183.6	8005.25	9827
617.589	10579.4	9570.41	9165.83	9165.83	10070.4		621.167	11256.3	8273.56	8113.4	8217.24	8002.24	9849.72
617.489	10480.3	9494.44	9167.25	9167.25	9994.44		621.067	11224	8250.03	8124.96	8251.43	7999.23	9877.96
617.389	10474.9	9435.82	9168.67	9168.67	9935.82		620.967	11272.7	8228.73	8139.57	8283.25	7996.22	9909.1
617.289	10428.1	9390.22	9170.09	9170.09	9890.22		620.867	11281.3	8209.34	8158.16	8309.49	7993.23	9940.54
617.189	10372.2	9354.46	9171.5	9171.5	9854.46		620.767	11362.7	8191.61	8182.07	8327.11	7990.24	9970.31
617.089	10325.5	9326.22	9172.92	9172.92	9826.22		620.667	11411.3	8175.33	8213.11	8333.7	7987.27	9997.6
616.989	10336.3	9303.75	9174.34	9174.34	9803.75		620.567	11487.3	8160.32	8253.95	8328.18	7984.31	10023.8
616.889	10306.1	9285.79	9175.76	9175.76	9785.79		620.467	11338.3	8146.43	8308.19	8310.75	7981.37	10052.6
616.789	10275.5	9271.34	9177.17	9177.17	9771.34		620.367	11401.3	8133.53	8380.91	8283.02	7978.44	10090.6
616.689	10273.9	9259.67	9178.59	9178.59	9759.67		620.267	11553	8121.51	8479.08	8247.68	7975.53	10147.2
616.589	10262.5	9250.22	9180.01	9180.01	9750.22		620.167	11699	8110.28	8611.27	8207.93	7972.64	10234.2
616.489	10288.9	9242.55	9181.43	9181.43	9742.55		620.067	11873.7	8099.76	8788.32	8167.01	7969.78	10365.5
616.389	10231.9	9236.32	9182.85	9182.85	9736.32		619.967	12032	8089.88	9022.01	8127.68	7966.96	10555.7
616.289	10191.8	9231.27	9184.26	9184.26	9731.27		619.867	12246.7	8080.6	9323.6	8091.96	7964.18	10817.8
616.189	10240.4	9227.18	9185.68	9185.68	9727.18		619.767	12503	8071.85	9702.56	8060.97	7961.45	11162.5
616.089	10231.3	9223.88	9187.1	9187.1	9723.88		619.667	12968.7	8063.61	10161.3	8035.13	7958.77	11592.5
615.989	10226.7	9221.24	9188.52	9188.52	9721.24		619.567	13509.7	8057.44	10693.5	8014.23	7956.18	12102.8
615.889	10257.5	9219.16	9189.93	9189.93	9719.16		619.467	13989	8049.65	11280.7	7997.67	7953.68	12670.6
615.789	10230.7	9217.54	9191.35	9191.35	9717.54		619.367	14650.3	8041.98	11890.1	7984.77	7951.29	13264.3
615.689	10160.2	9216.31	9192.77	9192.77	9716.31		619.267	15148.7	8035.73	12477.3	7974.75	7949.04	13839.7
615.589	10191.9	9215.41	9194.19	9194.19	9715.41		619.167	15704.7	8030.14	12990.2	7966.96	7946.95	14343.4
615.489	10191.1	9214.8	9195.6	9195.6	9714.8		619.067	16156	8024.72	13377.4	7960.87	7945.03	14722.9
615.389	10179	9214.42	9197.02	9197.02	9714.42		618.967	16459	8019.5	13594.3	7956.06	7943.3	14933.2
615.289	10221	9236.82	9221	9221	9736.82		618.867	16405	8014.48	13616.2	7952.24	7941.78	14949.4
615.189	10181.2	9195.61	9181.2	9181.2	9695.61		618.767	16108.7	8009.66	13439.2	7949.17	7940.45	14767.1
615.089	10205.4	9218.56	9205.4	9205.4	9718.56		618.667	15873	8005.89	13082	7946.68	7939.32	14406
614.989	10227.1	9239.12	9227.07	9227.07	9739.12		618.567	15297	8002.51	12584.6	7944.67	7938.37	13905
614.889	10243.5	9254.59	9243.53	9243.53	9754.59		618.467	14666	7999.3	11996.9	7943.03	7937.58	13314.1
614.789	10199.4	9209.56	9199.4	9199.4	9709.56		618.367	14053	7996.22	11373.1	7941.69	7936.94	12687.1
614.689	10184.9	9194.29	9184.93	9184.93	9694.29		618.267	13402	7993.27	10761.3	7940.59	7936.41	12072.4
614.589	10148.8	9157.43	9148.8	9148.8	9657.43		618.167	12895	7990.42	10199.1	7939.69	7935.98	11507.2
614.489	10158.9	9166.91	9158.93	9158.93	9666.91		618.067	12394.7	7988.24	9709.26	7938.93	7935.63	11015.2
614.389	10210.3	9217.65	9210.27	9210.27	9717.65		617.967	12022	7986.2	9301.9	7938.3	7935.35	10605.7
614.289	10202	9208.85	9202	9202	9708.85		617.867	11729	7984.22	8976.43	7937.77	7935.11	10278.2
614.189	10213.9	9220.29	9213.93	9213.93	9720.29		617.767	11529.7	7982.27	8724.3	7937.32	7934.91	10024.1
614.089	10214.3	9220.25	9214.33	9214.33	9720.25		617.667	11223	7980.36	8534.2	7936.94	7934.75	9831.99
613.989	10196.7	9202.18	9196.67	9196.67	9702.18		617.567	11069.7	7978.46	8393.27	7936.6	7934.61	9689.12
613.889	10206.8	9211.94	9206.8	9206.8	9711.94		617.467	11026.3	7977.02	8289.75	7936.31	7934.48	9584.12
613.789	10208.5	9213.26	9208.47	9208.47	9713.26		617.367	10940.7	7975.61	8214.08	7936.04	7934.37	9507
613.689	10176.2	9180.69	9176.2	9176.2	9680.69		617.267	10932.7	7974.21	8158.32	7935.81	7934.27	9449.8
613.589	10199.1	9203.33	9199.13	9199.13	9703.33		617.167	10855.7	7972.82	8116.82	7935.61	7934.19	9406.88
613.489	10207.2	9211.14	9207.2	9207.2	9711.14		617.067	10801	7971.45	8085.47	7935.42	7934.11	9374.12
613.389	10179	9182.69	9179	9179	9682.69		616.967	10792.7	7970.09	8061.34	7935.26	7934.04	9348.61
613.289	10200.7	9204.14	9200.67	9200.67	9704.14		616.867	10838.3	7969.04	8042.47	7935.11	7933.98	9328.66
613.189	10206.9	9210.2	9206.93	9206.93	9710.2		616.767	10721.7	7967.99	8027.43	7934.98	7933.92	9312.56
613.089	10190.2	9193.27	9190.2	9190.2	9693.27		616.667	10702	7966.95	8015.24	7934.86	7933.87	9299.3
612.989	10194.3	9197.23	9194.33	9194.33	9697.23		616.567	10710.3	7965.91	8005.24	7934.75	7933.83	9288.24
612.889	10204.2	9206.93	9204.2	9204.2	9706.93		616.467	10718.7	7964.88	7996.9	7934.65	7933.79	9278.85
612.789	10187.3	9189.91	9187.33	9187.33	9689.91		616.367	10738.3	7963.88	7989.9	7934.56	7933.75	9270.83
612.689	10195.5	9197.9	9195.47	9195.47	9697.9		616.267	10726.3	7963.07	7983.95	7934.48	7933.72	9264.06
612.589	10198.9	9201.24	9198.93	9198.93	9701.24		616.167	10592.3	7962.27	7978.86	7934.41	7933.69	9258.15
612.489	10172.4	9174.58	9172.4	9172.4	9674.58		616.067	10635	7961.47	7974.46	7934.34	7933.67	9252.94
612.389	10144.7	9146.8	9144.73	9144.73	9646.8		615.967	10628.7	7960.68	7970.65	7934.28	7933.65	9248.32
612.289	10197.9	9199.89	9197.93	9197.93	9699.89		615.867	10649.3	7959.88	7967.31	7934.24	7933.62	9244.19
612.189	10176.6	9178.46	9176.6	9176.6	9678.46		615.767	10711	7959.12	7964.39	7934.18	7933.6	9240.49
612.089	10162.7	9164.5	9162.73	9162.73	9664.5		615.667	10663.7	7958.49	7961.81	7934.13	7933.59	9237.26
611.989	10174.6	9176.28	9174.6	9174.6	9676.28		615.567	10582.7	7957.86	7959.52	7934.09	7933.57	9234.33
611.889	10227.1	9228.66	9227.07	9227.07	9728.66		615.467	10624.3	7957.24	7957.49	7934.05	7933.56	9231.65
611.789	10208.8	9210.32	9208.8	9208.8	9710.32		615.367	10665.3	7956.61	7955.67	7934.02	7933.55	9229.2
611.689	10168	9169.45	9168	9168	9669.45		615.267	10598.7	7955.99	7954.03	7933.99	7933.54	9226.93
611.589	10201.9	9203.31	9201.93	9201.93	9703.31		615.167	10578.7	7955.4	7952.57	7933.96	7933.53	9224.86
611.489	10194.9	9196.25	9194.93	9194.93	9696.25		615.067	10623.3	7954.9	7951.24	7933.93	7933.52	9223.02
614.883	8342.67	7202.53	7219.22	7208.5	7193.28		614.967	10495.7	7954.4	7950.04	7933.9	7933.52	9221.3
614.783	8364.67	7202.28	7217.72	7207.91	7193.27		614.867	10552.7	7953.89	7948.95	7933.87	7933.51	9219.7
614.683	8457.33	7202.06	7216.34	7207.36	7193.26		614.767	10516	7953.39	7947.95	7933.85	7933.5	9218.19
614.583	8427.67	7201.86	7215.07	7206.85	7193.25		614.667	10498.3	7952.89	7947.05	7933.83	7933.5	9216.78
614.483	8376.33	7201.66	7213.89	7206.36	7193.24		614.567	10584.3	7952.42	7946.21	7933.81	7933.49	9215.47
614.383	8370.67	7201.46	7212.81	7205.9	7193.23		614.467	10619	7952.01	7945.45	7933.79	7933.48	9214.29
614.283	8435.33	7201.27	7211.81	7205.46	7193.23		614.367	10569.7	7951.6	7944.75	7933.77	7933.48	9213.17
614.183	8365	7201.07	7210.88	7205.05	7193.23		614.267	10589	7951.19	7944.11	7933.75	7933.47	9212.11
614.083	8345	7200.9	7210.01	7204.66	7193.22		614.167	10562	7950.78	7943.73	7933.73	7933.46	9211.32
613.983	8375	7200.74	7209.21	7204.29	7193.22		614.067	10545.3	7950.37	7943.14	7933.72	7933.46	9210.31
613.883	8319.67	7200.59	7208.45	7203.94	7193.22		613.967	10603.7	7949.99	7942.55	7933.7	7933.45	9209.34
613.783	8349.33	7200.43	7208.02	7203.6	7193.22		613.867	10629.7	7949.65	7941.98	7933.69	7933.45	9208.43
613.683	8341	7200.27	7207.29	7203.28	7193.22		613.767	10661	7949.31	7941.61	7933.67	7933.45	9207.71
613.583	8341.33	7200.12	7206.56	7202.98	7193.22		613.667	10600.3	7948.98	7941.25	7933.67	7933.44	9207
613.483	8347.33	7204.08	7210.07	7206.8	7197.33		613.567	10571	7948.64	7940.88	7933.66	7933.44	9206.29
613.383	8393.33	7249.95	7255.6	7252.52	7243.33		613.467	10579	7943.86	7936.07	7929.21	7929	9201.14
613.283	8344.33	7200.82	7206.12	7203.26	7194.33		613.367	10533.3	7897.89	7890.04	7883.53	7883.33	9154.8
613.183	8323.33	7179.69	7184.65	7182	7173.33		613.267	10647.3	8011.61	8003.67	7997.52	7997.33	9268.14
613.083	8309	7165.23	7169.85	7167.42	7159		613.167	10667	8031	8023.07	8017.18	8017	9287.25
612.983	8390.33	7246.43	7250.71	7248.53	7240.33		613.067	10569.7	7933.39	7925.49	7919.84	7919.67	9189.39
612.883	8438	7293.97	7297.91	7295.97	7288		612.967	10609.3	7972.77	7964.92	7959.51	7959.33	9228.53
612.783	8411.67	7267.53	7271.2	7269.42	7261.67		612.867	10556.3	7919.49	7911.67	7906.5	7906.33	9175
612.683	8350.67	7206.42	7209.88	7208.22	7200.67		612.767	10540.3	7903.24	7895.43	7890.49	7890.33	9158.5
612.583	8407.67	7263.32	7266.56	7265.02	7257.67		612.667	10578.7	7941.34	7933.52	7928.82	7928.67	9196.35
612.483	8419	7274.54	7277.57	7276.16	7269		612.567	10677.7	8040.1	8032.32	8027.82	8027.67	9294.91
612.383	8417	7272.43	7275.25	7273.98	7267		612.467	10620.7	7982.87	7975.15	7970.81	7970.67	9237.5
612.283	8414	7269.33	7271.93	7270.8	7264		612.367	10514.3	7876.3	7868.65	7864.47	7864.33	9130.76
612.183	8409.67	7264.9	7267.28	7266.3	7259.67		612.267	10559	7920.73	7913.15	7909.14	7909	9175.01
612.083	8483	7338.14	7340.36	7339.47	7333		612.167	10513.7	7875.18	7867.65	7863.8	7863.67	9129.3
611.983	8352.33	7207.38	7209.47	7208.65	7202.33		612.067	10612.3	7973.65	7966.15	7962.46	7962.33	9227.59
611.883	8313.67	7168.62	7170.58	7169.83	7163.67		611.967	10575	7936.11	7928.66	7925.12	7925	9189.9
611.783	8392	7246.87	7248.69	7248.02	7242		611.867	10491.3	7852.25	7844.87	7841.45	7841.33	9105.9
611.683	8377	7231.78	7233.46	7232.88	7227		611.767	10679.7	8040.38	8033.09	8029.78	8029.67	9293.91
611.583	8377	7231.69	7233.23	7232.74	7227		611.667	10599	7959.51	7952.3	7949.11	7949	9212.92
611.483	8432.33	7286.95	7288.34	7287.95	7282.33		611.567	10657	8017.33	8010.18	8007.11	8007	9270.62
611.383	8450.33	7304.87	7306.17	7305.82	7300.33		611.467	10617.3	7977.49	7970.39	7967.44	7967.33	9230.66
611.283	8507.33	7361.79	7363	7362.7	7357.33		611.367	10598	7957.99	7950.94	7948.1	7948	9211.03
611.183	8407	7261.38	7262.5	7262.25	7257		611.267	10629.7	7989.48	7982.52	7979.77	7979.67	9242.43
611.083	8449	7303.3	7304.34	7304.2	7299		611.167	10586.7	7946.31	7939.43	7936.77	7936.67	9199.17
610.983	8483	7337.23	7338.18	7338.09	7333		611.067	10618.3	7977.8	7971	7968.43	7968.33	9230.57
610.883	8437	7291.16	7292.01	7291.97	7287		610.967	10611	7970.32	7963.58	7961.09	7961	9222.99
610.783	8397.67	7251.76	7252.51	7252.52	7247.67		610.867	10652.7	8011.83	8005.16	8002.76	8002.67	9264.42
610.683	8367.67	7221.7	7222.39	7222.4	7217.67		610.767	10647	8006.02	7999.4	7997.09	7997	9258.51
610.583	8499.33	7353.3	7353.93	7353.95	7349.33		610.667	10638.7	7997.54	7991	7988.75	7988.67	9249.95
610.483	8503	7356.9	7357.47	7357.53	7353		610.567	10566	7924.72	7918.26	7916.08	7916	9177.07
610.383	8440.33	7294.16	7294.68	7294.78	7290.33		610.467	10570.3	7928.9	7922.53	7920.42	7920.33	9181.18
610.283	8442.33	7296.11	7296.56	7296.7	7292.33		610.367	10624	7982.44	7976.13	7974.08	7974	9234.65
610.183	8445.33	7299.05	7299.44	7299.63	7295.33		610.267	10626	7984.31	7978.06	7976.08	7976	9236.45
610.083	8425.33	7278.99	7279.31	7279.55	7275.33		610.167	10703.7	8061.85	8055.66	8053.74	8053.67	9313.92
609.983	8375.67	7229.27	7229.55	7229.8	7225.67		610.067	10624.3	7982.38	7976.27	7974.41	7974.33	9234.4
609.883	8461.33	7314.88	7315.12	7315.39	7311.33		609.967	10645.7	8003.59	7997.55	7995.74	7995.67	9255.55
609.783	8405.67	7259.15	7259.36	7259.64	7255.67		609.867	10639.7	7997.46	7991.5	7989.74	7989.67	9249.36
609.683	8427.67	7281.1	7281.27	7281.56	7277.67		609.767	10582.7	7940.35	7934.45	7932.74	7932.67	9192.2
609.583	8442	7295.39	7295.51	7295.81	7292		609.667	10630.3	7987.9	7982.06	7980.4	7980.33	9239.7
609.483	8421.33	7274.67	7274.74	7275.07	7271.33		609.567	10624.7	7982.12	7976.35	7974.73	7974.67	9233.86
609.383	8442.67	7295.95	7295.99	7296.32	7292.67		609.467	10654.3	8011.67	8005.96	8004.4	8004.33	9263.37
609.283	8496.67	7349.9	7349.91	7350.25	7346.67		609.367	10634.7	7991.89	7986.26	7984.73	7984.67	9243.54
609.183	8497.67	7350.85	7350.84	7351.2	7347.67		609.267	10712.7	8069.78	8064.21	8062.73	8062.67	9321.39
609.083	8446.33	7299.47	7299.43	7299.81	7296.33		609.167	10672.7	8029.68	8024.17	8022.73	8022.67	9281.25
608.983	8438	7291.1	7291.02	7291.42	7288		609.067	10655	8011.91	8006.47	8005.06	8005	9263.44
608.883	8438.33	7291.39	7291.28	7291.7	7288.33		608.967	10638.7	7995.48	7990.09	7988.72	7988.67	9246.97
608.783	8406.33	7259.34	7259.21	7259.64	7256.33		608.867	10663	8019.71	8014.39	8013.06	8013	9271.16
608.683	8434.67	7287.63	7287.47	7287.92	7284.67		608.767	10693.7	8050.28	8045.02	8043.72	8043.67	9301.69
608.583	8446.33	7299.25	7299.08	7299.53	7296.33		608.667	10699.7	8056.18	8050.99	8049.72	8049.67	9307.56
608.483	8437.67	7290.55	7290.35	7290.8	7287.67		608.567	10689.3	8045.76	8040.62	8039.39	8039.33	9297.1
608.383	8518	7370.84	7370.63	7371.08	7368		608.467	10563	7919.34	7914.26	7913.05	7913	9170.65
608.283	8415.67	7268.47	7268.23	7268.69	7265.67		608.367	10623.7	7979.92	7974.89	7973.72	7973.67	9231.19
608.183	8429.67	7282.43	7282.18	7282.63	7279.67		608.267	10628	7984.17	7979.19	7978.05	7978	9235.41
608.083	8429	7281.73	7281.45	7281.91	7279		608.167	10687.3	8043.41	8038.5	8037.38	8037.33	9294.62
607.983	8415.67	7268.35	7268.06	7268.54	7265.67		608.067	10632	7987.99	7983.14	7982.05	7982	9239.18
607.883	8405	7257.65	7257.35	7257.83	7255		607.967	10625	7980.91	7976.11	7975.05	7975	9232.07
607.783	8439.33	7291.95	7291.63	7292.12	7289.33		607.867	10608.7	7964.5	7959.75	7958.71	7958.67	9215.63
607.683	8436.67	7289.25	7288.92	7289.41	7286.67		607.767	10643.7	7999.42	7994.73	7993.71	7993.67	9250.53
607.583	8484.67	7337.21	7336.87	7337.37	7334.67		607.667	10701.7	8057.35	8052.7	8051.71	8051.67	9308.42
607.483	8490.67	7343.18	7342.82	7343.33	7340.67		607.567	10707.7	8063.27	8058.68	8057.71	8057.67	9314.32
607.383	8487.67	7340.15	7339.78	7340.29	7337.67		607.467	10731.3	8086.86	8082.32	8081.37	8081.33	9337.89
607.283	8383.33	7235.78	7235.4	7235.91	7233.33		607.367	10730.3	8085.79	8081.3	8080.37	8080.33	9336.8
607.183	8407.67	7260.08	7259.69	7260.21	7257.67		607.267	10640.7	7996.05	7991.61	7990.71	7990.67	9247.04
607.083	8503.33	7355.72	7355.32	7355.83	7353.33		607.167	10655.3	8010.65	8006.26	8005.37	8005.33	9261.61
606.983	8460.33	7312.69	7312.28	7312.79	7310.33		607.067	10682	8037.25	8032.9	8032.04	8032	9288.19

## Sheet: C10 XPS spectra
C10-1							C10-2								C10-3
BE (eV)	Spectra	I-	I0	background	simulation		BE (eV)	Spectra	I5+	I-	I0	background	simulation		BE (eV)	Spectra	I5+	I-	background	simulation
652.189	8720.6	8720.6	8720.6	8720.6	8720.6		647.007	9238.67	9239.79	9239.02	9238.77	9238.67	9240.24		643.407	10463.6	10463.8	10464.1	10463.6	10464.3
652.089	8729.1	8729.1	8729.1	8729.1	8729.1		646.907	9287	9288.13	9287.35	9287.1	9287	9288.58		643.307	10460.7	10461	10461.2	10460.7	10461.4
651.989	8747.6	8747.6	8747.6	8747.6	8747.6		646.807	9301.33	9302.48	9301.69	9301.43	9301.33	9302.93		643.207	10450.9	10451.2	10451.4	10450.9	10451.6
651.889	8696.2	8696.2	8696.2	8696.2	8696.2		646.707	9277.33	9278.49	9277.69	9277.44	9277.33	9278.95		643.107	10435.7	10435.9	10436.1	10435.7	10436.4
651.789	8684.2	8684.2	8684.2	8684.2	8684.2		646.607	9164.67	9165.84	9165.03	9164.77	9164.67	9166.3		643.007	10433.2	10433.4	10433.7	10433.2	10433.9
651.689	8682.6	8682.6	8682.6	8682.6	8682.6		646.507	9330.67	9331.85	9331.03	9330.77	9330.67	9332.32		642.907	10411.7	10412	10412.2	10411.7	10412.5
651.589	8712.9	8712.9	8712.9	8712.9	8712.9		646.407	9289	9290.19	9289.37	9289.1	9289	9290.67		642.807	10408.3	10408.6	10408.8	10408.3	10409.1
651.489	8683.7	8683.7	8683.7	8683.7	8683.7		646.307	9310.33	9311.54	9310.7	9310.44	9310.33	9312.02		642.707	10375.2	10375.4	10375.7	10375.2	10375.9
651.389	8746.4	8746.4	8746.4	8746.4	8746.4		646.207	9245.67	9246.89	9246.04	9245.77	9245.67	9247.37		642.607	10361.2	10361.4	10361.7	10361.2	10361.9
651.289	8675.9	8675.9	8675.9	8675.9	8675.9		646.107	9254.33	9255.57	9254.71	9254.44	9254.33	9256.05		642.507	10343.9	10344.1	10344.4	10343.9	10344.6
651.189	8713.6	8713.6	8713.6	8713.6	8713.6		646.007	9243	9244.25	9243.38	9243.11	9243	9244.73		642.407	10344.3	10344.6	10344.8	10344.3	10345.1
651.089	8737.8	8737.8	8737.8	8737.8	8737.8		645.907	9149.67	9150.93	9150.05	9149.78	9149.67	9151.42		642.307	10392.1	10392.4	10392.7	10392.1	10392.9
650.989	8704.8	8704.8	8704.8	8704.8	8704.8		645.807	9235.67	9236.94	9236.05	9235.78	9235.67	9237.44		642.207	10328.2	10328.5	10328.7	10328.2	10329
650.889	8703.2	8703.2	8703.2	8703.2	8703.2		645.707	9252.67	9253.96	9253.05	9252.78	9252.67	9254.45		642.107	10329.6	10329.9	10330.1	10329.6	10330.4
650.789	8699	8699	8699	8699	8699		645.607	9163	9164.3	9163.39	9163.11	9163	9164.81		642.007	10354.7	10354.9	10355.2	10354.7	10355.5
650.689	8688.3	8688.3	8688.3	8688.3	8688.3		645.507	9154.33	9155.65	9154.73	9154.45	9154.33	9156.16		641.907	10328.2	10328.5	10328.7	10328.2	10329
650.589	8682.2	8682.2	8682.2	8682.2	8682.2		645.407	9211.67	9213	9212.06	9211.78	9211.67	9213.51		641.807	10323	10323.3	10323.6	10323	10323.8
650.489	8663.5	8663.5	8663.5	8663.5	8663.5		645.307	9218.67	9220.01	9219.07	9218.78	9218.67	9220.53		641.707	10314	10314.3	10314.6	10314	10314.8
650.389	8747.3	8747.3	8747.3	8747.3	8747.3		645.207	9172.33	9173.7	9172.74	9172.45	9172.33	9174.22		641.607	10291.4	10291.7	10292	10291.4	10292.3
650.289	8703.2	8703.2	8703.2	8703.2	8703.2		645.107	9155.33	9156.71	9155.74	9155.45	9155.33	9157.24		641.507	10269.8	10270.1	10270.4	10269.8	10270.7
650.189	8676.3	8676.3	8676.3	8676.3	8676.3		645.007	9067.33	9068.73	9067.74	9067.45	9067.33	9069.26		641.407	10246	10246.3	10246.6	10246	10246.9
650.089	8711.3	8711.3	8711.3	8711.3	8711.3		644.907	9159.33	9160.74	9159.75	9159.45	9159.33	9161.28		641.307	10241.3	10241.6	10241.9	10241.3	10242.2
649.989	8676.2	8676.2	8676.2	8676.2	8676.2		644.807	9147.33	9148.76	9147.75	9147.45	9147.33	9149.3		641.207	10233.9	10234.3	10234.5	10233.9	10234.8
649.889	8704.8	8704.8	8704.8	8704.8	8704.8		644.707	9103.67	9105.11	9104.09	9103.79	9103.67	9105.65		641.107	10246.2	10246.5	10246.8	10246.2	10247.1
649.789	8715.9	8715.9	8715.9	8715.9	8715.9		644.607	9063	9064.46	9063.43	9063.12	9063	9065.01		641.007	10198.5	10198.9	10199.1	10198.5	10199.5
649.689	8707.6	8707.6	8707.6	8707.6	8707.6		644.507	8986.67	8988.14	8987.1	8986.79	8986.67	8988.7		640.907	10193.9	10194.2	10194.5	10193.9	10194.8
649.589	8678	8678	8678	8678	8678		644.407	9048	9049.49	9048.43	9048.13	9048	9050.05		640.807	10202.4	10202.7	10203	10202.4	10203.4
649.489	8710.9	8710.9	8710.9	8710.9	8710.9		644.307	8928	8929.51	8928.44	8928.13	8928	8930.08		640.707	10202.6	10202.9	10203.2	10202.6	10203.6
649.389	8729.6	8729.6	8729.6	8729.6	8729.6		644.207	8949	8950.53	8949.44	8949.13	8949	8951.1		640.607	10206.4	10206.8	10207	10206.4	10207.4
649.289	8677.6	8677.6	8677.6	8677.6	8677.6		644.107	8939	8940.55	8939.44	8939.13	8939	8941.12		640.507	10197.8	10198.2	10198.4	10197.8	10198.8
649.189	8707.9	8707.9	8707.9	8707.9	8707.9		644.007	8958	8959.57	8958.45	8958.13	8958	8960.15		640.407	10200.6	10201	10201.2	10200.6	10201.6
649.089	8751.3	8751.3	8751.3	8751.3	8751.3		643.907	8990	8991.59	8990.45	8990.13	8990	8992.17		640.307	10168.3	10168.7	10169	10168.3	10169.4
648.989	8746.1	8746.1	8746.1	8746.1	8746.1		643.807	8961	8962.61	8961.46	8961.13	8961	8963.2		640.207	10144.7	10145.1	10145.3	10144.7	10145.7
648.889	8782.3	8782.3	8782.3	8782.3	8782.3		643.707	8938.33	8939.96	8938.79	8938.47	8938.33	8940.55		640.107	10174.9	10175.3	10175.6	10174.9	10176
648.789	8720	8720	8720	8720	8720		643.607	8867	8868.65	8867.46	8867.14	8867	8869.25		640.007	10160.2	10160.6	10160.9	10160.2	10161.3
648.689	8717.2	8717.2	8717.2	8717.2	8717.2		643.507	8857.67	8859.33	8858.13	8857.8	8857.67	8859.94		639.907	10122.6	10123	10123.3	10122.6	10123.7
648.589	8742.7	8742.7	8742.7	8742.7	8742.7		643.407	8871.67	8873.36	8872.14	8871.8	8871.67	8873.97		639.807	10148.9	10149.4	10149.6	10148.9	10150.1
648.489	8737.5	8737.5	8737.5	8737.5	8737.5		643.307	8885.67	8887.38	8886.14	8885.81	8885.67	8887.99		639.707	10108.2	10108.6	10108.9	10108.2	10109.3
648.389	8731.6	8731.6	8731.6	8731.6	8731.6		643.207	8871	8872.73	8871.48	8871.14	8871	8873.35		639.607	10130.9	10131.3	10131.6	10130.9	10132
648.289	8718.4	8718.4	8718.4	8718.4	8718.4		643.107	8934.33	8936.09	8934.82	8934.48	8934.33	8936.71		639.507	10132.1	10132.5	10132.8	10132.1	10133.2
648.189	8737	8737	8737	8737	8737		643.007	8802	8803.78	8802.49	8802.14	8802	8804.41		639.407	10118.1	10118.5	10118.8	10118.1	10119.3
648.089	8716.4	8716.4	8716.4	8716.4	8716.4		642.907	8915	8916.8	8915.49	8915.14	8915	8917.44		639.307	10126.3	10126.8	10127.1	10126.3	10127.5
647.989	8735.6	8735.6	8735.6	8735.6	8735.6		642.807	8857.33	8859.16	8857.83	8857.48	8857.33	8859.8		639.207	10133	10133.5	10133.8	10133	10134.2
647.889	8731.1	8731.1	8731.1	8731.1	8731.1		642.707	8895.33	8897.18	8895.84	8895.48	8895.33	8897.83		639.107	10145.9	10146.4	10146.7	10145.9	10147.2
647.789	8745.4	8745.4	8745.4	8745.4	8745.4		642.607	8904.67	8906.54	8905.17	8904.82	8904.67	8907.19		639.007	10102	10102.5	10102.8	10102	10103.3
647.689	8724.4	8724.4	8724.4	8724.4	8724.4		642.507	8857.67	8859.56	8858.18	8857.82	8857.67	8860.22		638.907	10109.9	10110.4	10110.7	10109.9	10111.2
647.589	8740.2	8740.2	8740.2	8740.2	8740.2		642.407	8828.33	8830.25	8828.85	8828.49	8828.33	8830.92		638.807	10149.3	10149.8	10150.1	10149.3	10150.6
647.489	8742	8742	8742	8742	8742		642.307	8816.33	8818.28	8816.86	8816.49	8816.33	8818.95		638.707	10116.2	10116.7	10117	10116.2	10117.5
647.389	8713.7	8713.7	8713.7	8713.7	8713.7		642.207	8821.33	8823.3	8821.86	8821.49	8821.33	8823.99		638.607	10117.7	10118.2	10118.5	10117.7	10119
647.289	8771.3	8771.3	8771.3	8771.3	8771.3		642.107	8747.33	8749.33	8747.87	8747.49	8747.33	8750.02		638.507	10151.9	10152.4	10152.7	10151.9	10153.2
647.189	8757.2	8757.2	8757.2	8757.2	8757.2		642.007	8712.33	8714.36	8712.87	8712.49	8712.33	8715.05		638.407	10140.7	10141.2	10141.5	10140.7	10142.1
647.089	8749.7	8749.7	8749.7	8749.7	8749.7		641.907	8758	8760.05	8758.54	8758.16	8758	8760.75		638.307	10142.3	10142.8	10143.1	10142.3	10143.7
646.989	8770.3	8770.3	8770.3	8770.3	8770.3		641.807	8742.67	8744.74	8743.21	8742.83	8742.67	8745.45		638.207	10159.1	10159.7	10159.9	10159.1	10160.5
646.889	8780	8780	8780	8780	8780		641.707	8694.33	8696.44	8694.89	8694.5	8694.33	8697.16		638.107	10181.6	10182.2	10182.5	10181.6	10183.1
646.789	8795.5	8795.5	8795.5	8795.5	8795.5		641.607	8804.33	8806.47	8804.89	8804.5	8804.33	8807.19		638.007	10191.7	10192.3	10192.6	10191.7	10193.2
646.689	8831.9	8831.9	8831.9	8831.9	8831.9		641.507	8697	8699.17	8697.56	8697.17	8697	8699.9		637.907	10214.3	10215	10215.2	10214.3	10215.9
646.589	8817.7	8817.7	8817.7	8817.7	8817.7		641.407	8728	8730.2	8728.57	8728.17	8728	8730.93		637.807	10220.5	10221.1	10221.4	10220.5	10222
646.489	8762.7	8762.7	8762.7	8762.7	8762.7		641.307	8675.67	8677.89	8676.24	8675.84	8675.67	8678.64		637.707	10276.4	10277.1	10277.3	10276.4	10278
646.389	8771	8771	8771	8771	8771		641.207	8739.33	8741.59	8739.91	8739.51	8739.33	8742.34		637.607	10304.4	10305.1	10305.3	10304.4	10306
646.289	8819.7	8819.7	8819.7	8819.7	8819.7		641.107	8658	8660.29	8658.59	8658.17	8658	8661.05		637.507	10320.9	10321.6	10321.8	10320.9	10322.5
646.189	8792.5	8792.5	8792.5	8792.5	8792.5		641.007	8683	8685.32	8683.59	8683.18	8683	8686.09		637.407	10383.6	10384.3	10384.6	10383.6	10385.3
646.089	8781	8781	8781	8781	8781		640.907	8683.33	8685.69	8683.93	8683.51	8683.33	8686.47		637.307	10457.5	10458.3	10458.5	10457.5	10459.2
645.989	8797.6	8797.6	8797.6	8797.6	8797.6		640.807	8635	8637.39	8635.6	8635.18	8635	8638.17		637.207	10565.5	10566.3	10566.5	10565.5	10567.3
645.889	8789.3	8789.3	8789.3	8789.3	8789.3		640.707	8562	8564.42	8562.61	8562.18	8562	8565.21		637.107	10715.8	10716.6	10716.8	10715.8	10717.6
645.789	8730.6	8730.6	8730.6	8730.6	8730.6		640.607	8594.33	8596.79	8594.95	8594.52	8594.33	8597.59		637.007	10874.7	10875.5	10875.8	10874.7	10876.5
645.689	8793.8	8793.8	8793.8	8793.8	8793.8		640.507	8609	8611.5	8609.62	8609.19	8609	8612.31		636.907	11065.7	11066.5	11066.7	11065.7	11067.5
645.589	8807.8	8807.8	8807.8	8807.8	8807.8		640.407	8655.67	8658.2	8656.3	8655.86	8655.67	8659.02		636.807	11298.7	11299.5	11299.7	11298.7	11300.5
645.489	8766.6	8766.6	8766.6	8766.6	8766.6		640.307	8607.67	8610.24	8608.3	8607.86	8607.67	8611.06		636.707	11674.3	11675.2	11675.4	11674.3	11676.2
645.389	8820.1	8820.1	8820.1	8820.1	8820.1		640.207	8571	8573.61	8571.64	8571.19	8571	8574.44		636.607	12096.5	12097.3	12097.6	12096.5	12098.4
645.289	8821.4	8821.4	8821.4	8821.4	8821.4		640.107	8571	8573.65	8571.65	8571.2	8571	8574.49		636.507	12651.9	12652.8	12653	12651.9	12653.9
645.189	8783.8	8783.8	8783.8	8783.8	8783.8		640.007	8601.67	8604.35	8602.32	8601.86	8601.67	8605.21		636.407	13278.1	13279	13279.2	13278.1	13280.1
645.089	8789.5	8789.5	8789.5	8789.5	8789.5		639.907	8569.33	8572.06	8569.99	8569.53	8569.33	8572.92		636.307	14078.3	14079.3	14079.5	14078.3	14080.4
644.989	8815.2	8815.2	8815.2	8815.2	8815.2		639.807	8593.67	8596.44	8594.34	8593.87	8593.67	8597.31		636.207	14999.5	15000.4	15000.6	14999.5	15001.6
644.889	8819.6	8819.6	8819.6	8819.6	8819.6		639.707	8496.33	8499.15	8497.01	8496.54	8496.33	8500.03		636.107	15961.3	15962.3	15962.5	15961.3	15963.5
644.789	8805.9	8805.9	8805.9	8805.9	8805.9		639.607	8532.33	8535.19	8533.02	8532.54	8532.33	8536.08		636.007	16941.7	16942.8	16942.9	16941.7	16943.9
644.689	8774	8774	8774	8774	8774		639.507	8463	8465.9	8463.69	8463.21	8463	8466.8		635.907	17879.4	17880.4	17880.6	17879.4	17881.6
644.589	8777	8777	8777	8777	8777		639.407	8480.67	8483.61	8481.36	8480.88	8480.67	8484.52		635.807	18555	18556.1	18556.2	18555	18557.3
644.489	8819	8819	8819	8819	8819		639.307	8479.67	8482.66	8480.37	8479.88	8479.67	8483.58		635.707	18922.1	18923.2	18923.4	18922.1	18924.5
644.389	8854	8854	8854	8854	8854		639.207	8501.67	8504.71	8502.38	8501.88	8501.67	8505.64		635.607	19055.9	19057	19057.1	19055.9	19058.3
644.289	8868.3	8868.3	8868.3	8868.3	8868.3		639.107	8574.33	8577.43	8575.05	8574.55	8574.33	8578.37		635.507	18755.4	18756.6	18756.7	18755.4	18757.9
644.189	8828.4	8828.4	8828.4	8828.4	8828.4		639.007	8540	8543.14	8540.73	8540.22	8540	8544.09		635.407	18140.9	18142.1	18142.2	18140.9	18143.4
644.089	8861.4	8861.4	8861.4	8861.4	8861.4		638.907	8485.33	8488.53	8486.07	8485.56	8485.33	8489.49		635.307	17279.6	17280.8	17280.9	17279.6	17282.2
643.989	8805.8	8805.8	8805.8	8805.8	8805.8		638.807	8491	8494.24	8491.74	8491.23	8491	8495.22		635.207	16206.4	16207.7	16207.7	16206.4	16209
643.889	8828.7	8828.7	8828.7	8828.7	8828.7		638.707	8602.33	8605.63	8603.09	8602.56	8602.33	8606.62		635.107	15104	15105.3	15105.4	15104	15106.7
643.789	8840.7	8840.7	8840.7	8840.7	8840.7		638.607	8574	8577.36	8574.76	8574.23	8574	8578.35		635.007	14148.4	14149.8	14149.8	14148.4	14151.1
643.689	8829.3	8829.3	8829.3	8829.3	8829.3		638.507	8561	8564.41	8561.77	8561.24	8561	8565.42		634.907	13305.1	13306.5	13306.5	13305.1	13307.9
643.589	8904	8904	8904	8904	8904		638.407	8656.33	8659.8	8657.11	8656.57	8656.33	8660.82		634.807	12596.8	12598.2	12598.2	12596.8	12599.7
643.489	8842.8	8842.8	8842.8	8842.8	8842.8		638.307	8569.33	8572.86	8570.12	8569.58	8569.33	8573.89		634.707	12035	12036.5	12036.5	12035	12037.9
643.389	8773.5	8773.5	8773.5	8773.5	8773.5		638.207	8589	8592.58	8589.8	8589.25	8589	8593.63		634.607	11632.1	11633.6	11633.5	11632.1	11635.1
643.289	8803.8	8803.8	8803.8	8803.8	8803.8		638.107	8659.67	8663.32	8660.47	8659.92	8659.67	8664.37		634.507	11337.5	11339.1	11339	11337.5	11340.6
643.189	8798.5	8798.5	8798.5	8798.5	8798.5		638.007	8565	8568.72	8565.81	8565.25	8565	8569.78		634.407	11062.7	11064.4	11064.3	11062.7	11065.9
643.089	8842.4	8842.4	8842.4	8842.4	8842.4		637.907	8571	8574.78	8571.82	8571.26	8571	8575.86		634.307	10888.5	10890.2	10890	10888.5	10891.7
642.989	8845.3	8845.3	8845.3	8845.3	8845.3		637.807	8696	8699.85	8696.83	8696.26	8696	8700.94		634.207	10734	10735.7	10735.6	10734	10737.3
642.889	8782.7	8782.7	8782.7	8782.7	8782.7		637.707	8687.67	8691.58	8688.51	8687.93	8687.67	8692.68		634.107	10627.1	10628.9	10628.8	10627.1	10630.6
642.789	8842.9	8842.9	8842.9	8842.9	8842.9		637.607	8732.67	8736.65	8733.52	8732.93	8732.67	8737.76		634.007	10556.5	10558.4	10558.2	10556.5	10560
642.689	8866.3	8866.3	8866.3	8866.3	8866.3		637.507	8874	8878.05	8874.86	8874.27	8874	8879.19		633.907	10459	10460.9	10460.7	10459	10462.6
642.589	8860.5	8860.5	8860.5	8860.5	8860.5		637.407	8906	8910.13	8906.87	8906.27	8906	8911.28		633.807	10375.6	10377.6	10377.3	10375.6	10379.3
642.489	8804.3	8804.3	8804.3	8804.3	8804.3		637.307	8971.67	8975.87	8972.55	8971.94	8971.67	8977.03		633.707	10301.1	10303.1	10302.8	10301.1	10304.8
642.389	8856.1	8856.1	8856.1	8856.1	8856.1		637.207	9083.33	9087.62	9084.23	9083.61	9083.33	9088.79		633.607	10269.7	10271.8	10271.5	10269.7	10273.6
642.289	8861.7	8861.7	8861.7	8861.7	8861.7		637.107	9225.67	9230.03	9226.57	9225.95	9225.67	9231.22		633.507	10185.3	10187.4	10187.1	10185.3	10189.2
642.189	8844.9	8844.9	8844.9	8844.9	8844.9		637.007	9436	9440.44	9436.92	9436.29	9436	9441.64		633.407	10178.8	10181	10180.6	10178.8	10182.9
642.089	8827.6	8827.6	8827.6	8827.6	8827.6		636.907	9740.67	9745.19	9741.59	9740.96	9740.67	9746.41		633.307	10103.5	10105.8	10105.3	10103.5	10107.7
641.989	8837.1	8837.1	8837.1	8837.1	8837.1		636.807	10066.7	10071.3	10067.6	10067	10066.7	10072.5		633.207	10028.5	10031	10030.4	10028.5	10032.9
641.889	8824.9	8824.9	8824.9	8824.9	8824.9		636.707	10406.7	10411.4	10407.6	10407	10406.7	10412.6		633.107	10060.5	10063	10062.4	10060.5	10064.9
641.789	8856.2	8856.2	8856.2	8856.2	8856.2		636.607	10946.7	10951.5	10947.6	10947	10946.7	10952.7		633.007	10060.2	10062.8	10062.2	10060.2	10064.8
641.689	8856.9	8856.9	8856.9	8856.9	8856.9		636.507	11597.3	11602.2	11598.3	11597.6	11597.3	11603.5		632.907	10082.4	10085.1	10084.4	10082.4	10087.2
641.589	8887.2	8887.2	8887.2	8887.2	8887.2		636.407	12424.7	12429.6	12425.7	12425	12424.7	12430.9		632.807	10077.2	10080	10079.2	10077.2	10082
641.489	8848.9	8848.9	8848.9	8848.9	8848.9		636.307	13478	13483.1	13479	13478.3	13478	13484.4		632.707	10067.5	10070.3	10069.6	10067.5	10072.4
641.389	8849.9	8849.9	8849.9	8849.9	8849.9		636.207	14543	14548.2	14544	14543.3	14543	14549.5		632.607	10066.7	10069.7	10068.9	10066.7	10071.8
641.289	8844.5	8844.5	8844.5	8844.5	8844.5		636.107	15870	15875.3	15871	15870.3	15870	15876.6		632.507	10076.2	10079.3	10078.4	10076.2	10081.5
641.189	8899.1	8899.1	8899.1	8899.1	8899.1		636.007	17065.3	17070.7	17066.4	17065.7	17065.3	17072.1		632.407	10054.7	10058	10056.9	10054.7	10060.2
641.089	8826.6	8826.6	8826.6	8826.6	8826.6		635.907	18491.7	18497.2	18492.7	18492	18491.7	18498.6		632.307	10080.3	10083.7	10082.6	10080.3	10085.9
640.989	8828.2	8828.2	8828.2	8828.2	8828.2		635.807	19778.7	19784.3	19779.7	19779	19778.7	19785.7		632.207	10071.2	10074.7	10073.5	10071.2	10077
640.889	8795.1	8795.1	8795.1	8795.1	8795.1		635.707	20535.7	20541.4	20536.7	20536	20535.7	20542.8		632.107	10107.7	10111.3	10110	10107.7	10113.6
640.789	8781.1	8781.1	8781.1	8781.1	8781.1		635.607	21138.3	21144.2	21139.4	21138.7	21138.3	21145.6		632.007	10118.9	10122.7	10121.3	10118.9	10125.1
640.689	8886.8	8886.8	8886.8	8886.8	8886.8		635.507	21421	21427	21422.1	21421.4	21421	21428.5		631.907	10145.8	10149.7	10148.2	10145.8	10152.2
640.589	8789.6	8789.6	8789.6	8789.6	8789.6		635.407	21127.7	21133.8	21128.8	21128	21127.7	21135.3		631.807	10158	10162.1	10160.5	10158	10164.6
640.489	8797.2	8797.2	8797.2	8797.2	8797.2		635.307	20371.3	20377.6	20372.5	20371.7	20371.3	20379.1		631.707	10227.3	10231.6	10229.9	10227.3	10234.2
640.389	8868.9	8868.9	8868.9	8868.9	8868.9		635.207	19297.3	19303.7	19298.5	19297.7	19297.3	19305.2		631.607	10284	10288.5	10286.6	10284	10291.1
640.289	8855.3	8855.3	8855.3	8855.3	8855.3		635.107	17877	17883.5	17878.2	17877.4	17877	17885.1		631.507	10364.7	10369.4	10367.4	10364.7	10372
640.189	8819.4	8819.4	8819.4	8819.4	8819.4		635.007	16519.7	16526.3	16520.8	16520.1	16519.7	16527.9		631.407	10532.1	10536.9	10534.8	10532.1	10539.6
640.089	8866.2	8866.2	8866.2	8866.2	8866.2		634.907	15004.7	15011.5	15005.9	15005.1	15004.7	15013.1		631.307	10743.5	10748.6	10746.3	10743.5	10751.4
639.989	8824.2	8824.2	8824.2	8824.2	8824.2		634.807	13710.7	13717.6	13711.9	13711.1	13710.7	13719.3		631.207	10906.1	10911.4	10908.9	10906.1	10914.2
639.889	8839.2	8839.2	8839.2	8839.2	8839.2		634.707	12621	12628.1	12622.2	12621.4	12621	12629.8		631.107	11153.2	11158.8	11156.1	11153.2	11161.6
639.789	8865.2	8865.2	8865.2	8865.2	8865.2		634.607	11699.7	11707	11700.9	11700.1	11699.7	11708.6		631.007	11441.3	11447.2	11444.3	11441.3	11450.1
639.689	8796.2	8796.2	8796.2	8796.2	8796.2		634.507	10986.7	10994.1	10987.9	10987.1	10986.7	10995.8		630.907	11684	11690.1	11687	11684	11693.1
639.589	8855.1	8855.1	8855.1	8855.1	8855.1		634.407	10447	10454.6	10448.3	10447.4	10447	10456.3		630.807	11873.8	11880.2	11876.9	11873.8	11883.3
639.489	8836.2	8836.2	8836.2	8836.2	8836.2		634.307	10045	10052.8	10046.3	10045.4	10045	10054.6		630.707	12040.4	12047.1	12043.5	12040.4	12050.3
639.389	8864.8	8864.8	8864.8	8864.8	8864.8		634.207	9709	9717.02	9710.32	9709.44	9709	9718.78		630.607	12162	12169.1	12165.2	12162	12172.3
639.289	8820.5	8820.5	8820.5	8820.5	8820.5		634.107	9457.67	9465.87	9459.01	9458.11	9457.67	9467.66		630.507	12193.2	12200.6	12196.5	12193.2	12203.9
639.189	8838.7	8838.7	8838.7	8838.7	8838.7		634.007	9219.33	9227.73	9220.69	9219.78	9219.33	9229.54		630.407	12102.4	12110.2	12105.8	12102.4	12113.6
639.089	8867.2	8867.2	8867.2	8867.2	8867.2		633.907	9118	9126.59	9119.38	9118.46	9118	9128.43		630.307	11995.1	12003.3	11998.5	11995.1	12006.8
638.989	8874.8	8874.8	8874.8	8874.8	8874.8		633.807	9002	9010.82	9003.4	9002.47	9002	9012.69		630.207	11753	11761.7	11756.5	11753	11765.2
638.889	8834.9	8834.9	8834.9	8834.9	8834.9		633.707	8926.67	8935.73	8928.09	8927.14	8926.67	8937.62		630.107	11490.7	11499.8	11494.3	11490.7	11503.5
638.789	8854.4	8854.4	8854.4	8854.4	8854.4		633.607	8788	8797.29	8789.44	8788.48	8788	8799.22		630.007	11189.7	11199.3	11193.4	11189.7	11203.1
638.689	8855.3	8855.3	8855.3	8855.3	8855.3		633.507	8630.33	8639.86	8631.8	8630.83	8630.33	8641.82		629.907	10938.7	10949	10942.5	10938.7	10952.8
638.589	8844.2	8844.2	8844.2	8844.2	8844.2		633.407	8677.67	8687.43	8679.15	8678.17	8677.67	8689.42		629.807	10635.7	10646.5	10639.5	10635.7	10650.4
638.489	8828.6	8828.6	8828.6	8828.6	8828.6		633.307	8552.67	8562.67	8554.18	8553.18	8552.67	8564.68		629.707	10405.5	10416.9	10409.4	10405.5	10420.9
638.389	8857.8	8857.8	8857.8	8857.8	8857.8		633.207	8479.33	8489.62	8480.87	8479.85	8479.33	8491.68		629.607	10223.3	10235.4	10227.3	10223.3	10239.4
638.289	8853.1	8853.1	8853.1	8853.1	8853.1		633.107	8419.67	8430.25	8421.22	8420.2	8419.67	8432.34		629.507	10047.7	10060.6	10051.9	10047.7	10064.7
638.189	8841.2	8841.2	8841.2	8841.2	8841.2		633.007	8366.33	8377.21	8367.91	8366.87	8366.33	8379.33		629.407	9919.73	9933.41	9924	9919.73	9937.68
638.089	8838.5	8838.5	8838.5	8838.5	8838.5		632.907	8356.67	8367.84	8358.27	8357.21	8356.67	8369.99		629.307	9839.2	9853.75	9843.6	9839.2	9858.14
637.989	8848.1	8848.1	8848.1	8848.1	8848.1		632.807	8353.33	8364.8	8354.96	8353.89	8353.33	8366.99		629.207	9691.87	9707.36	9696.39	9691.87	9711.88
637.889	8861.2	8861.2	8861.2	8861.2	8861.2		632.707	8355.67	8367.43	8357.32	8356.23	8355.67	8369.66		629.107	9677	9693.51	9681.65	9677	9698.17
637.789	8829.8	8829.8	8829.8	8829.8	8829.8		632.607	8342.33	8354.46	8344.02	8342.91	8342.33	8356.72		629.007	9621.33	9638.96	9626.12	9621.33	9643.75
637.689	8854.7	8854.7	8854.7	8854.7	8854.7		632.507	8355.33	8367.84	8357.04	8355.92	8355.33	8370.14		628.907	9583.6	9602.44	9588.51	9583.6	9607.36
637.589	8861.5	8861.5	8861.5	8861.5	8861.5		632.407	8399.67	8412.55	8401.41	8400.27	8399.67	8414.89		628.807	9576.87	9597.04	9581.81	9576.87	9601.98
637.489	8870.8	8870.8	8870.8	8870.8	8870.8		632.307	8319	8332.26	8320.77	8319.61	8319	8334.64		628.707	9521.47	9543.09	9526.54	9521.47	9548.17
637.389	8860.5	8860.5	8860.5	8860.5	8860.5		632.207	8348.67	8362.3	8350.46	8349.29	8348.67	8364.72		628.607	9500.2	9523.42	9505.41	9500.2	9528.63
637.289	8923.3	8923.3	8923.3	8923.3	8923.3		632.107	8307.33	8321.35	8309.16	8307.97	8307.33	8323.81		628.507	9483.13	9508.1	9488.49	9483.13	9513.46
637.189	8866.4	8866.4	8866.4	8866.4	8866.4		632.007	8260.33	8274.8	8262.19	8260.98	8260.33	8277.3		628.407	9472.13	9499.03	9477.64	9472.13	9504.54
637.089	8829	8829	8829	8829	8829		631.907	8245	8259.96	8246.89	8245.66	8245	8262.5		628.307	9476.33	9505.36	9481.99	9476.33	9511.02
636.989	8839.5	8839.5	8839.5	8839.5	8839.5		631.807	8296	8311.45	8297.92	8296.67	8296	8314.04		628.207	9451.33	9482.72	9457.16	9451.33	9488.54
636.889	8879.7	8879.7	8879.7	8879.7	8879.7		631.707	8154.67	8170.61	8156.62	8155.36	8154.67	8173.25		628.107	9435.8	9469.79	9441.79	9435.8	9475.78
636.789	8840.6	8840.6	8840.6	8840.6	8840.6		631.607	8126.67	8143.1	8128.65	8127.37	8126.67	8145.79		628.007	9409.73	9446.63	9415.9	9409.73	9452.8
636.689	8860.9	8860.9	8860.9	8860.9	8860.9		631.507	8141	8157.92	8143.02	8141.72	8141	8160.66		627.907	9431.33	9471.47	9437.68	9431.33	9477.82
636.589	8918.4	8918.4	8918.4	8918.4	8918.4		631.407	8186	8203.49	8188.05	8186.74	8186	8206.28		627.807	9420.87	9464.62	9427.4	9420.87	9471.16
636.489	8883.2	8883.2	8883.2	8883.2	8883.2		631.307	8237.67	8255.82	8239.75	8238.42	8237.67	8258.65		627.707	9449.8	9490.59	9449.51	9442.78	9497.33
636.389	8884.5	8884.5	8884.5	8884.5	8884.5		631.207	8284	8302.81	8286.13	8284.77	8284	8305.7		627.607	9457.67	9492.77	9447.33	9440.39	9499.71
636.289	8878.5	8878.5	8878.5	8878.5	8878.5		631.107	8414.33	8433.8	8416.5	8415.12	8414.33	8436.74		627.507	9463.93	9495.52	9445.13	9437.97	9502.67
636.189	8871.3	8871.3	8871.3	8871.3	8871.3		631.007	8439	8459.12	8441.21	8439.8	8439	8462.12		627.407	9453.2	9498.91	9442.9	9435.53	9506.29
636.089	8867.8	8867.8	8867.8	8867.8	8867.8		630.907	8533.67	8554.44	8535.92	8534.48	8533.67	8557.51		627.307	9421.87	9503.09	9440.67	9433.06	9510.7
635.989	8883	8883	8883	8883	8883		630.807	8680	8701.51	8682.29	8680.84	8680	8704.64		627.207	9445.47	9508.17	9438.41	9430.56	9516.03
635.889	8871.2	8871.2	8871.2	8871.2	8871.2		630.707	8764.67	8787.08	8767	8765.52	8764.67	8790.26		627.107	9436.13	9514.35	9436.14	9428.03	9522.46
635.789	8860	8860	8860	8860	8860		630.607	8822.33	8845.64	8824.71	8823.21	8822.33	8848.89		627.007	9460.93	9521.81	9433.86	9425.48	9530.18
635.689	8847	8847	8847	8847	8847		630.507	8932.33	8956.54	8934.75	8933.23	8932.33	8959.85		626.907	9440.2	9530.84	9431.56	9422.91	9539.49
635.589	8880.7	8880.7	8880.7	8880.7	8880.7		630.407	8988.33	9013.44	8990.8	8989.25	8988.33	9016.82		626.807	9471.27	9541.71	9429.26	9420.31	9550.66
635.489	8847.6	8847.6	8847.6	8847.6	8847.6		630.307	8979.67	9005.67	8982.18	8980.6	8979.67	9009.12		626.707	9495.6	9554.87	9426.94	9417.69	9564.12
635.389	8868.3	8868.3	8868.3	8868.3	8868.3		630.207	8917	8943.97	8919.56	8917.95	8917	8947.49		626.607	9529.07	9570.76	9424.61	9415.04	9580.34
635.289	8863	8863	8863	8863	8863		630.107	8941.67	8969.91	8944.28	8942.65	8941.67	8973.5		626.507	9549.6	9590.06	9422.28	9412.37	9599.97
635.189	8841.9	8841.9	8841.9	8841.9	8841.9		630.007	8766.67	8796.18	8769.33	8767.67	8766.67	8799.85		626.407	9573.6	9613.54	9419.94	9409.68	9623.8
635.089	8891.7	8891.7	8891.7	8891.7	8891.7		629.907	8623	8653.79	8625.72	8624.03	8623	8657.54		626.307	9645.87	9642.22	9417.6	9406.97	9652.85
634.989	8915	8915	8915	8915	8915		629.807	8507.67	8539.73	8510.43	8508.72	8507.67	8543.55		626.207	9632.07	9677.5	9415.25	9404.24	9688.52
634.889	8891.6	8891.6	8891.6	8891.6	8891.6		629.707	8380	8413.33	8382.82	8381.08	8380	8417.23		626.107	9686.8	9721.03	9412.91	9401.49	9732.45
634.789	8915.2	8915.2	8915.2	8915.2	8915.2		629.607	8203.33	8237.95	8206.22	8204.44	8203.33	8241.95		626.007	9754.8	9775.35	9410.58	9398.72	9787.2
634.689	8887.5	8887.5	8887.5	8887.5	8887.5		629.507	8042.67	8079.16	8045.61	8043.8	8042.67	8083.25		625.907	9830.73	9843.21	9408.25	9395.94	9855.51
634.589	8882.3	8882.3	8882.3	8882.3	8882.3		629.407	7968.33	8006.71	7971.34	7969.5	7968.33	8010.88		625.807	9920.73	9929.47	9405.92	9393.14	9942.25
634.489	8884.8	8884.8	8884.8	8884.8	8884.8		629.307	7838.33	7878.58	7841.41	7839.53	7838.33	7882.86		625.707	10075.2	10039.1	9403.62	9390.33	10052.4
634.389	8899.4	8899.4	8899.4	8899.4	8899.4		629.207	7778.67	7820.79	7781.81	7779.9	7778.67	7825.17		625.607	10278.4	10181.1	9401.33	9387.51	10194.9
634.289	8845.7	8845.7	8845.7	8845.7	8845.7		629.107	7685.67	7729.67	7688.87	7686.93	7685.67	7734.14		625.507	10459.6	10365.4	9399.06	9384.69	10379.8
634.189	8887.1	8887.1	8887.1	8887.1	8887.1		629.007	7613.33	7659.21	7616.6	7614.64	7613.33	7663.78		625.407	10774.7	10608.3	9396.82	9381.86	10623.3
634.089	8876.5	8876.5	8876.5	8876.5	8876.5		628.907	7621	7669.67	7624.33	7622.34	7621	7674.34		625.307	11109.7	10930.3	9394.61	9379.03	10945.9
633.989	8944.7	8944.7	8944.7	8944.7	8944.7		628.807	7536	7587.58	7539.42	7537.37	7536	7592.37		625.207	11594.9	11360.1	9392.45	9376.2	11376.4
633.889	8977.3	8977.3	8977.3	8977.3	8977.3		628.707	7507	7561.5	7510.5	7508.41	7507	7566.4		625.107	12199	11935	9390.34	9373.39	11951.9
633.789	8943.2	8943.2	8943.2	8943.2	8943.2		628.607	7538.33	7594.74	7541.91	7539.78	7538.33	7599.77		625.007	12964.9	12695.1	9388.3	9370.6	12712.8
633.689	8915.5	8915.5	8915.5	8915.5	8915.5		628.507	7492	7551.6	7495.66	7493.49	7492	7556.75		624.907	13908.8	13683.6	9386.33	9367.85	13702.1
633.589	8946.6	8946.6	8946.6	8946.6	8946.6		628.407	7483.33	7546.38	7487.08	7484.88	7483.33	7551.67		624.807	14998.3	14908.8	9384.46	9365.14	14928.1
633.489	8971.4	8971.4	8971.4	8971.4	8971.4		628.307	7426	7492.79	7429.83	7427.59	7426	7498.21		624.707	16255.8	16337.7	9382.7	9362.49	16357.9
633.389	8984.9	8984.9	8984.9	8984.9	8984.9		628.207	7435	7505.86	7438.91	7436.64	7435	7511.41		624.607	17633.3	17850.2	9381.08	9359.91	17871.3
633.289	8970.9	8970.9	8970.9	8970.9	8970.9		628.107	7448	7531.07	7459.78	7457.47	7455.78	7536.76		624.507	19007.9	19280.6	9379.61	9357.44	19302.8
633.189	8979.3	8979.3	8979.3	8979.3	8979.3		628.007	7484.33	7529.14	7453.12	7450.75	7449.01	7534.99		624.407	20279.2	20478.4	9378.34	9355.08	20501.7
633.089	8989.6	8989.6	8989.6	8989.6	8989.6		627.907	7489.67	7527.6	7446.39	7443.96	7442.18	7533.6		624.307	21317.4	21329	9377.26	9352.85	21353.4
632.989	8939.9	8939.9	8939.9	8939.9	8939.9		627.807	7504	7526.51	7439.59	7437.11	7435.27	7532.68		624.207	21899.3	21777.4	9376.42	9350.77	21803.1
632.889	8969.6	8969.6	8969.6	8969.6	8969.6		627.707	7441.33	7525.94	7432.72	7430.2	7428.29	7532.28		624.107	21995.5	21795.8	9375.82	9348.84	21822.8
632.789	8978.7	8978.7	8978.7	8978.7	8978.7		627.607	7521.33	7525.96	7425.79	7423.23	7421.25	7532.48		624.007	21611.1	21377	9375.47	9347.07	21405.4
632.689	9000.2	9000.2	9000.2	9000.2	9000.2		627.507	7493	7526.67	7418.79	7416.19	7414.14	7533.37		623.907	20721.9	20544.3	9375.38	9345.45	20574.2
632.589	9021.7	9021.7	9021.7	9021.7	9021.7		627.407	7478.33	7528.19	7411.72	7409.09	7406.97	7535.06		623.807	19378.4	19358.5	9375.55	9343.97	19390.1
632.489	9075.7	9075.7	9075.7	9075.7	9075.7		627.307	7500	7530.64	7404.61	7401.92	7399.73	7537.71		623.707	17952.1	17957.8	9375.97	9342.62	17991.1
632.389	9003.4	9003.4	9003.4	9003.4	9003.4		627.207	7503.67	7534.18	7397.45	7394.69	7392.43	7541.47		623.607	16509.5	16508.8	9376.63	9341.37	16544
632.289	9027.8	9027.8	9027.8	9027.8	9027.8		627.107	7489.33	7539.01	7390.24	7387.4	7385.07	7546.51		623.507	15127.3	15156.5	9377.54	9340.21	15193.8
632.189	8989.1	8989.1	8989.1	8989.1	8989.1		627.007	7480.67	7545.36	7382.96	7380.07	7377.65	7553.09		623.407	14000.9	13994	9378.68	9339.11	14033.6
632.089	9009.2	9009.2	9009.2	9009.2	9009.2		626.907	7515.33	7553.5	7375.63	7372.69	7370.17	7561.49		623.307	13021.7	13042.6	9380.06	9338.07	13084.6
631.989	9062.7	9062.7	9062.7	9062.7	9062.7		626.807	7567.67	7563.8	7368.24	7365.26	7362.63	7572.03		623.207	12248.4	12292.4	9381.7	9337.06	12337.1
631.889	9026	9026	9026	9026	9026		626.707	7584	7576.67	7360.8	7357.78	7355.05	7585.15		623.107	11632.1	11708	9383.6	9336.09	11755.5
631.789	9075.7	9075.7	9075.7	9075.7	9075.7		626.607	7648.67	7592.68	7353.3	7350.2	7347.41	7601.37		623.007	11198	11255.7	9385.78	9335.14	11306.4
631.689	9131.3	9131.3	9131.3	9131.3	9131.3		626.507	7766.33	7612.51	7345.8	7342.63	7339.72	7621.49		622.907	10879.1	10904.8	9388.28	9334.2	10958.9
631.589	9189.7	9189.7	9189.7	9189.7	9189.7		626.407	7719.33	7637.1	7338.27	7335.02	7331.99	7646.4		622.807	10603.7	10630.3	9391.11	9333.28	10688.2
631.489	9159.5	9159.5	9159.5	9159.5	9159.5		626.307	7820	7667.61	7330.7	7327.37	7324.22	7677.24		622.707	10454.3	10414.5	9394.33	9332.37	10476.4
631.389	9257	9257	9257	9257	9257		626.207	7814.33	7705.68	7323.09	7319.69	7316.41	7715.64		622.607	10296.4	10242.2	9397.96	9331.46	10308.7
631.289	9336.9	9336.9	9336.9	9336.9	9336.9		626.107	7905.67	7753.49	7315.44	7311.99	7308.56	7763.78		622.507	10155.5	10104.2	9402.08	9330.56	10175.8
631.189	9413.7	9413.7	9413.7	9413.7	9413.7		626.007	8038.33	7814.14	7307.76	7304.26	7300.68	7824.79		622.407	10083.9	9991.86	9406.74	9329.67	10068.9
631.089	9483.4	9483.4	9483.4	9483.4	9483.4		625.907	8064.67	7891.93	7300.06	7296.51	7292.78	7902.94		622.307	9982	9900.11	9412.01	9328.78	9983.35
630.989	9588.8	9588.8	9588.8	9588.8	9588.8		625.807	8258.33	7993.11	7292.32	7288.75	7284.85	8004.49		622.207	9888.73	9824.02	9417.99	9327.88	9914.13
630.889	9658.3	9658.3	9658.3	9658.3	9658.3		625.707	8427.67	8126.3	7284.64	7280.98	7276.9	8138.13		622.107	9826.33	9760.7	9424.77	9326.99	9858.48
630.789	9674.1	9674.1	9674.1	9674.1	9674.1		625.607	8598.33	8304.09	7276.97	7273.22	7268.93	8316.41		622.007	9753.2	9707.39	9432.48	9326.1	9813.77
630.689	9728.1	9728.1	9728.1	9728.1	9728.1		625.507	8778	8543.53	7269.29	7265.46	7260.97	8556.35		621.907	9732.13	9662.26	9441.26	9325.21	9778.31
630.589	9710.3	9710.3	9710.3	9710.3	9710.3		625.407	9113.33	8868.34	7261.62	7257.72	7253	8881.67		621.807	9714.27	9623.76	9451.3	9324.32	9750.74
630.489	9696	9696	9696	9696	9696		625.307	9612.33	9308.13	7253.95	7250	7245.05	9321.99		621.707	9687.33	9590.67	9462.79	9323.43	9730.03
630.389	9620	9620	9620	9620	9620		625.207	10283	9900.03	7246.31	7242.34	7237.12	9914.44		621.607	9694.13	9562.1	9476	9322.54	9715.57
630.289	9568.2	9568.2	9568.2	9568.2	9568.2		625.107	11079	10683.4	7238.72	7234.74	7229.24	10698.4		621.507	9728	9537.22	9491.24	9321.64	9706.82
630.189	9532.5	9532.5	9532.5	9532.5	9532.5		625.007	12064	11698.3	7231.2	7227.23	7221.42	11713.9		621.407	9703.6	9515.51	9508.89	9320.75	9703.66
630.089	9450	9450	9450	9450	9450		624.907	13184.7	12972.3	7223.91	7219.84	7213.71	12988.6		621.307	9755.53	9496.39	9529.42	9319.86	9705.95
629.989	9388.3	9388.3	9388.3	9388.3	9388.3		624.807	14723	14514.7	7216.76	7212.61	7206.12	14531.9		621.207	9808.13	9479.53	9553.42	9318.97	9713.98
629.889	9252.5	9252.5	9252.5	9252.5	9252.5		624.707	16310	16299.2	7209.78	7205.58	7198.7	16317.1		621.107	9802.87	9464.54	9581.6	9318.08	9728.06
629.789	9181.8	9181.8	9181.8	9181.8	9181.8		624.607	18064.7	18259.4	7202.82	7198.8	7191.49	18278		621.007	9768.67	9451.19	9614.89	9317.19	9748.89
629.689	9137.6	9137.6	9137.6	9137.6	9137.6		624.507	19992	20282.2	7196.32	7192.32	7184.55	20301.7		620.907	9837.53	9439.22	9654.44	9316.3	9777.36
629.589	9071.4	9071.4	9071.4	9071.4	9071.4		624.407	21900.3	22216.1	7190.16	7186.2	7177.92	22236.6		620.807	9875.87	9428.47	9701.71	9315.42	9814.76
629.489	9026.9	9026.9	9026.9	9026.9	9026.9		624.307	23574	23890.3	7184.39	7180.5	7171.65	23911.8		620.707	9911.8	9418.76	9758.58	9314.54	9862.8
629.389	8993	8993	8993	8993	8993		624.207	24956	25135.2	7179.07	7175.26	7165.79	25157.9		620.607	9935.27	9409.96	9827.46	9313.66	9923.76
629.289	8965.5	8965.5	8965.5	8965.5	8965.5		624.107	25898	25822	7174.22	7170.55	7160.38	25846		620.507	9993.73	9401.96	9911.41	9312.79	10000.6
629.189	8933.4	8933.4	8933.4	8933.4	8933.4		624.007	26172.7	25873.9	7169.88	7166.38	7155.45	25899.2		620.407	10114.6	9394.66	10014.4	9311.93	10097.1
629.089	8945.4	8945.4	8945.4	8945.4	8945.4		623.907	25609.3	25296.7	7166.07	7162.78	7151	25323.5		620.307	10220.1	9387.99	10141.3	9311.07	10218.2
628.989	8939.7	8939.7	8939.7	8939.7	8939.7		623.807	24631	24160.1	7162.76	7159.76	7147.01	24188.6		620.207	10350.1	9381.86	10298.2	9310.22	10369.8
628.889	8938.1	8938.1	8938.1	8938.1	8938.1		623.707	22852.7	22599.2	7159.95	7157.31	7143.47	22629.5		620.107	10562.1	9376.22	10492.5	9309.38	10559.3
628.789	8909.5	8909.5	8909.5	8909.5	8909.5		623.607	20870	20773.7	7157.58	7155.4	7140.32	20806		620.007	10782.7	9371.02	10731.7	9308.56	10794.2
628.689	8920.3	8920.3	8920.3	8920.3	8920.3		623.507	18886.3	18850.4	7155.62	7154.02	7137.53	18885		619.907	11070.7	9366.22	11022.5	9307.76	11080.9
628.589	8930	8930	8930	8930	8930		623.407	16794	16973	7154.01	7153.14	7135.03	17010.1		619.807	11425.5	9361.78	11367.9	9306.97	11422.7
628.489	8925.8	8925.8	8925.8	8925.8	8925.8		623.307	14988.3	15246.9	7152.71	7152.76	7132.77	15286.8		619.707	11784.6	9357.67	11763.3	9306.21	11814.7
628.389	8884.4	8884.4	8884.4	8884.4	8884.4		623.207	13479.3	13737.8	7151.67	7152.9	7130.7	13780.9		619.607	12200.8	9353.86	12192.5	9305.49	12240.9
628.289	8942	8942	8942	8942	8942		623.107	12186	12468.6	7150.87	7153.59	7128.79	12515.5		619.507	12641.2	9350.34	12627.5	9304.8	12673.1
628.189	8921.7	8921.7	8921.7	8921.7	8921.7		623.007	11141	11436.5	7150.29	7154.9	7127	11487.7		619.407	13073.4	9347.07	13028	9304.15	13070.9
628.089	8911.4	8911.4	8911.4	8911.4	8911.4		622.907	10539	10615.4	7149.9	7156.93	7125.31	10671.6		619.307	13366.5	9344.06	13349.2	9303.55	13389.7
627.989	8881.5	8881.5	8881.5	8881.5	8881.5		622.807	9990	9973.79	7149.69	7159.83	7123.69	10035.9		619.207	13611.5	9341.28	13560.7	9303.01	13599
627.889	8876.9	8876.9	8876.9	8876.9	8876.9		622.707	9562	9475.27	7149.68	7163.82	7122.14	9544.48		619.107	13736	9338.72	13650.2	9302.52	13686.4
627.789	8877.6	8877.6	8877.6	8877.6	8877.6		622.607	9253.33	9089.18	7149.86	7169.14	7120.65	9166.88		619.007	13721.9	9336.36	13616.8	9302.09	13651.1
627.689	8883.3	8883.3	8883.3	8883.3	8883.3		622.507	8982.33	8787.75	7150.24	7176.14	7119.2	8875.72		618.907	13552.2	9334.2	13465.9	9301.71	13498.4
627.589	8891.1	8891.1	8891.1	8891.1	8891.1		622.407	8785	8550.61	7150.84	7185.19	7117.8	8651.04		618.807	13243.7	9332.22	13205.6	9301.4	13236.4
627.489	8895	8895	8895	8895	8895		622.307	8661.33	8361.12	7151.67	7196.76	7116.43	8476.69		618.707	12835.5	9330.41	12848.3	9301.13	12877.6
627.389	8908.9	8908.9	8908.9	8908.9	8908.9		622.207	8532.67	8207.91	7152.76	7211.32	7115.09	8341.81		618.607	12362.9	9328.74	12414.5	9300.91	12442.3
627.289	8870.1	8870.1	8870.1	8870.1	8870.1		622.107	8404.33	8081.96	7154.13	7229.35	7113.78	8237.89		618.507	11883.5	9327.21	11933.8	9300.73	11960.3
627.189	8888.9	8888.9	8888.9	8888.9	8888.9		622.007	8380.67	7977.23	7155.83	7251.25	7112.49	8159.32		618.407	11409.7	9325.81	11444.9	9300.59	11470.1
627.089	8903.3	8903.3	8903.3	8903.3	8903.3		621.907	8213.33	7888.85	7157.9	7277.27	7111.24	8101.55		618.307	11021.7	9324.51	10992.1	9300.47	11016.2
626.989	8883.3	8883.3	8883.3	8883.3	8883.3		621.807	8158.33	7813.58	7160.38	7307.42	7110	8061.38		618.207	10635	9323.3	10605.4	9300.37	10628.3
626.889	8909.8	8909.8	8909.8	8909.8	8909.8		621.707	8043.33	7748.71	7163.36	7341.33	7108.79	8035.83		618.107	10374.4	9322.18	10294.7	9300.3	10316.6
626.789	8888	8888	8888	8888	8888		621.607	7986.33	7692.43	7166.9	7378.21	7107.59	8022.36		618.007	10153.7	9321.14	10055.1	9300.23	10076
626.689	8914.6	8914.6	8914.6	8914.6	8914.6		621.507	7989	7643.14	7171.11	7416.77	7106.41	8018.2		617.907	9931.8	9320.17	9874.77	9300.18	9894.76
626.589	8929.7	8929.7	8929.7	8929.7	8929.7		621.407	7968.67	7599.73	7176.13	7455.23	7105.24	8020.6		617.807	9800.8	9319.26	9740.62	9300.14	9759.74
626.489	8904.4	8904.4	8904.4	8904.4	8904.4		621.307	7930.33	7561.23	7182.11	7491.41	7104.1	8026.55		617.707	9691.8	9318.41	9640.9	9300.1	9659.21
626.389	8898.6	8898.6	8898.6	8898.6	8898.6		621.207	7926	7526.93	7189.27	7522.93	7102.97	8033.19		617.607	9613.33	9317.61	9566.5	9300.07	9584.04
626.289	8920.6	8920.6	8920.6	8920.6	8920.6		621.107	7941.33	7496.18	7197.89	7547.39	7101.85	8037.74		617.507	9563.67	9316.86	9510.59	9300.04	9527.41
626.189	8902	8902	8902	8902	8902		621.007	7962.33	7468.52	7208.32	7562.69	7100.76	8038		617.407	9522.2	9316.15	9468.2	9300.02	9484.33
626.089	8906.7	8906.7	8906.7	8906.7	8906.7		620.907	8038.67	7443.5	7221.02	7567.28	7099.68	8032.44		617.307	9468.8	9315.48	9435.73	9300	9451.21
625.989	8922.5	8922.5	8922.5	8922.5	8922.5		620.807	8009	7420.81	7236.6	7560.4	7098.62	8020.57		617.207	9461.67	9314.85	9410.61	9299.98	9425.47
625.889	8873	8873	8873	8873	8873		620.707	8009	7400.14	7255.81	7542.19	7097.58	8002.98		617.107	9444.2	9314.25	9390.96	9299.96	9405.25
625.789	8850.3	8850.3	8850.3	8850.3	8850.3		620.607	8067	7381.26	7279.65	7513.69	7096.56	7981.48		617.007	9451.27	9313.68	9375.45	9299.94	9389.19
625.689	8908.1	8908.1	8908.1	8908.1	8908.1		620.507	8002.67	7363.95	7309.36	7476.75	7095.56	7958.93		616.907	9438.4	9313.15	9363.08	9299.93	9376.3
625.589	8922.1	8922.1	8922.1	8922.1	8922.1		620.407	8010.33	7348.04	7346.43	7433.8	7094.58	7939.11		616.807	9419.27	9312.64	9353.14	9299.92	9365.86
625.489	8916.5	8916.5	8916.5	8916.5	8916.5		620.307	7972.67	7333.38	7392.61	7387.56	7093.62	7926.3		616.707	9434.67	9312.16	9345.07	9299.91	9357.32
625.389	8916.6	8916.6	8916.6	8916.6	8916.6		620.207	7957	7319.83	7449.85	7340.66	7092.69	7924.96		616.607	9394.8	9311.7	9338.47	9299.9	9350.27
625.289	8896.6	8896.6	8896.6	8896.6	8896.6		620.107	7917	7307.28	7520.17	7295.46	7091.77	7939.37		616.507	9355.67	9311.27	9333.04	9299.89	9344.41
625.189	8927.1	8927.1	8927.1	8927.1	8927.1		620.007	7918.67	7295.63	7605.48	7253.8	7090.87	7973.18		616.407	9368.07	9310.86	9328.52	9299.89	9339.49
625.089	8915.2	8915.2	8915.2	8915.2	8915.2		619.907	8048.33	7284.78	7707.27	7216.95	7089.99	8029.03		616.307	9366.2	9310.47	9324.76	9299.88	9335.34
624.989	8929.7	8930.57	8930.57	8930.57	8930.57		619.807	8064	7274.68	7826.23	7185.54	7089.13	8108.19		616.207	9338	9310.1	9321.59	9299.88	9331.81
624.889	8947.1	8931.98	8931.98	8931.98	8931.98		619.707	8163.67	7265.25	7961.84	7159.68	7088.29	8210.19		616.107	9348.53	9309.74	9318.91	9299.88	9328.78
624.789	8935.6	8933.39	8933.39	8933.39	8933.39		619.607	8357	7256.43	8111.97	7139.08	7087.49	8332.51		616.007	9371.53	9309.4	9316.64	9299.87	9326.17
624.689	8962.7	8934.8	8934.8	8934.8	8934.8		619.507	8461	7248.18	8272.55	7123.15	7086.71	8470.46		615.907	9361.73	9309.08	9314.69	9299.87	9323.91
624.589	8967.5	8936.21	8936.21	8936.21	8936.21		619.407	8648	7242.58	8437.43	7111.15	7085.97	8619.23		615.807	9358.07	9308.78	9313.03	9299.87	9321.94
624.489	8965.8	8937.62	8937.62	8937.62	8937.62		619.307	8741.67	7234.8	8598.52	7102.33	7085.26	8765.13		615.707	9337.07	9308.49	9311.59	9299.87	9320.21
624.389	8978	8939.03	8939.03	8939.03	8939.03		619.207	8860.67	7227.07	8746.39	7095.97	7084.6	8900.22		615.607	9295.27	9308.21	9310.34	9299.87	9318.68
624.289	8941.3	8940.44	8940.44	8940.44	8940.44		619.107	8927.67	7220.46	8870.96	7091.45	7083.98	9014.91		615.507	9303.33	9307.94	9309.26	9299.87	9317.33
624.189	8938.1	8941.85	8941.85	8941.85	8941.85		619.007	9131.33	7215.09	8962.67	7088.27	7083.42	9099.19		615.407	9314.13	9307.87	9308.32	9299.87	9316.32
624.089	9018.6	8943.26	8943.26	8943.26	8943.26		618.907	9200.33	7209.77	9013.54	7086.03	7082.9	9143.55		615.307	9282.13	9289.87	9289.75	9282.13	9297.49
623.989	9018.1	8944.67	8944.67	8944.67	8944.67		618.807	9201.33	7204.5	9018.34	7084.46	7082.44	9142.42		615.207	9293.87	9301.34	9300.76	9293.87	9308.24
623.889	9029	8946.08	8946.08	8946.08	8946.08		618.707	9131.33	7199.29	8975.28	7083.35	7082.03	9093.85		615.107	9284.47	9291.68	9290.72	9284.47	9297.93
623.789	8977.2	8947.49	8947.5	8947.49	8947.5		618.607	9016	7194.14	8886.45	7082.54	7081.68	8999.76		615.007	9277.4	9284.35	9283.08	9277.4	9290.03
623.689	8954.1	8948.9	8948.92	8948.9	8948.92		618.507	8830	7189.49	8757.57	7081.95	7081.38	8866.25		614.907	9297.73	9304.43	9302.91	9297.73	9309.6
623.589	8962.1	8950.31	8950.35	8950.31	8950.35		618.407	8714	7185.82	8597.27	7081.51	7081.12	8702.36		614.807	9270.93	9277.47	9275.66	9270.93	9282.19
623.489	8991.2	8951.72	8951.79	8951.72	8951.79		618.307	8502	7182.19	8416.3	7081.18	7080.9	8517.86		614.707	9261.87	9268.24	9266.19	9261.87	9272.56
623.389	8966.2	8953.13	8953.26	8953.13	8953.26		618.207	8284.33	7178.59	8225.93	7080.93	7080.73	8324		614.607	9267.87	9274.07	9271.83	9267.87	9278.04
623.289	8932.2	8954.54	8954.76	8954.54	8954.76		618.107	8113	7175.03	8036.78	7080.73	7080.58	8131.38		614.507	9274.73	9280.78	9278.37	9274.73	9284.42
623.189	8986.9	8955.94	8956.31	8955.94	8956.31		618.007	7902.67	7171.5	7857.86	7080.58	7080.46	7949.02		614.407	9256.53	9262.42	9259.88	9256.53	9265.77
623.089	8960	8957.35	8957.94	8957.35	8957.94		617.907	7706	7168.15	7695.92	7080.45	7080.36	7783.8		614.307	9265.6	9271.32	9268.69	9265.6	9274.41
622.989	8984.2	8958.76	8959.7	8958.76	8959.7		617.807	7644.67	7165.55	7555.15	7080.35	7080.28	7640.49		614.207	9283	9288.56	9285.85	9283	9291.41
622.889	9000.2	8960.17	8961.63	8960.17	8961.63		617.707	7508.67	7162.97	7437.3	7080.27	7080.21	7520.11		614.107	9253.07	9258.46	9255.71	9253.07	9261.1
622.789	9032.8	8961.58	8963.81	8961.58	8963.81		617.607	7393.33	7160.4	7342.07	7080.2	7080.16	7422.36		614.007	9235.33	9240.57	9237.78	9235.33	9243.01
622.689	8947.9	8962.99	8966.33	8962.99	8966.33		617.507	7382.67	7157.84	7267.67	7080.15	7080.11	7345.44		613.907	9261	9266.07	9263.27	9261	9268.34
622.589	8978.1	8964.4	8969.32	8964.4	8969.32		617.407	7272.67	7155.28	7211.4	7080.1	7080.07	7286.65		613.807	9272.8	9277.71	9274.91	9272.8	9279.81
622.489	9019.9	8965.81	8972.94	8965.81	8972.95		617.307	7229.33	7152.75	7170.1	7080.06	7080.03	7242.85		613.707	9247.8	9252.57	9249.76	9247.8	9254.53
622.389	8974.2	8967.23	8977.36	8967.22	8977.36		617.207	7180.67	7150.82	7140.61	7080.02	7080	7211.45		613.607	9273.8	9278.47	9275.63	9273.8	9280.29
622.289	8972.4	8968.64	8982.76	8968.63	8982.77		617.107	7177.67	7148.88	7120.1	7079.99	7079.97	7189.03		613.507	9281.67	9286.23	9283.37	9281.67	9287.93
622.189	9001.4	8970.06	8989.35	8970.04	8989.37		617.007	7107	7146.95	7106.17	7079.96	7079.94	7173.2		613.407	9275.4	9279.85	9276.99	9275.4	9281.44
622.089	8978.6	8971.49	8997.29	8971.45	8997.33		616.907	7218	7145.02	7096.91	7079.93	7079.92	7162.03		613.307	9255.87	9260.21	9257.36	9255.87	9261.7
621.989	9021.2	8972.93	9006.75	8972.86	9006.82		616.807	7230.67	7143.09	7090.86	7079.91	7079.89	7154.07		613.207	9290.4	9294.64	9291.79	9290.4	9296.03
621.889	9006.5	8974.4	9017.77	8974.27	9017.91		616.707	7103.67	7141.17	7086.97	7079.89	7079.88	7148.27		613.107	9262.67	9266.8	9263.97	9262.67	9268.11
621.789	9019.7	8975.92	9030.25	8975.68	9030.49		616.607	7161.67	7139.62	7084.47	7079.87	7079.86	7144.25		613.007	9273.6	9277.63	9274.83	9273.6	9278.85
621.689	9040.6	8977.51	9043.92	8977.09	9044.34		616.507	7211	7138.12	7082.89	7079.85	7079.84	7141.18		612.907	9244.47	9248.39	9245.62	9244.47	9249.54
621.589	9083.6	8979.23	9058.29	8978.5	9059.03		616.407	7120.33	7136.63	7081.88	7079.84	7079.83	7138.69		612.807	9253.47	9257.28	9254.55	9253.47	9258.36
621.489	9069.9	8981.16	9072.71	8979.91	9073.96		616.307	7117	7135.14	7081.23	7079.83	7079.82	7136.56		612.707	9267	9270.71	9268.02	9267	9271.73
621.389	9044.8	8983.41	9086.28	8981.32	9088.37		616.207	7188.33	7133.65	7080.82	7079.81	7079.81	7134.67		612.607	9229.93	9233.53	9230.89	9229.93	9234.49
621.289	9105.2	8986.17	9098.01	8982.73	9101.45		616.107	7177.67	7132.17	7080.54	7079.81	7079.8	7132.91		612.507	9197.2	9200.73	9198.11	9197.2	9201.63
621.189	9104.4	8989.71	9106.98	8984.14	9112.55		616.007	7088	7130.91	7080.36	7079.8	7079.8	7131.47		612.407	9251	9254.45	9251.85	9251	9255.31
621.089	9175	8994.39	9112.45	8985.55	9121.3		615.907	7116.33	7129.73	7080.22	7079.8	7079.79	7130.17		612.307	9290.27	9293.65	9291.07	9290.27	9294.45
620.989	9106.8	9000.74	9114.02	8986.96	9127.8		615.807	7105.67	7128.56	7080.13	7079.79	7079.79	7128.9		612.207	9255.67	9258.97	9256.43	9255.67	9259.74
620.889	9114	9009.45	9111.65	8988.37	9132.74		615.707	7061.33	7127.38	7080.06	7079.79	7079.78	7127.66		612.107	9280.53	9283.77	9281.26	9280.53	9284.49
620.789	9184.1	9021.43	9105.73	8989.78	9137.39		615.607	7099.33	7126.21	7080	7079.78	7079.78	7126.44		612.007	9265.2	9268.36	9265.88	9265.2	9269.05
620.689	9150.7	9037.87	9096.96	8991.19	9143.64		615.507	7163.33	7125.04	7079.96	7079.78	7079.78	7125.22		611.907	9281.47	9284.56	9282.11	9281.47	9285.2
620.589	9157.3	9060.26	9086.31	8992.59	9153.97		615.407	7089	7124	7079.93	7079.78	7079.78	7124.15		611.807	9253.4	9256.42	9254.01	9253.4	9257.03
620.489	9132.5	9090.18	9074.75	8994	9170.93		615.307	7086.33	7123.05	7079.9	7079.78	7079.78	7123.18		611.707	9247.8	9250.74	9248.38	9247.8	9251.33
620.389	9170.9	9129.46	9063.16	8995.41	9197.21		615.207	7064	7106.33	7064.11	7064	7064	7106.44		611.607	9247.53	9250.4	9248.09	9247.53	9250.96
620.289	9225.7	9179.96	9052.24	8996.82	9235.38		615.107	7168.33	7209.72	7168.42	7168.34	7168.33	7209.82		611.507	9248.8	9251.6	9249.33	9248.8	9252.13
620.189	9290.5	9243.39	9042.48	8998.23	9287.64		615.007	7185	7225.45	7185.08	7185	7185	7225.53		611.407	9258.33	9261.07	9258.83	9258.33	9261.57
620.089	9362.5	9321.11	9034.19	8999.64	9355.66		614.907	7156.67	7196.17	7156.73	7156.67	7156.67	7196.24
619.989	9470.6	9413.68	9027.44	9001.05	9440.07		614.807	7085.33	7123.97	7085.39	7085.33	7085.33	7124.03
619.889	9553.3	9520.02	9022.2	9002.46	9539.76		614.707	7062.67	7100.53	7062.72	7062.67	7062.67	7100.58
619.789	9682.4	9637.62	9018.33	9003.87	9652.08		614.607	7040	7077.09	7040.04	7040	7040	7077.14
619.689	9754.3	9761.97	9015.67	9005.28	9772.36		614.507	7102	7138.32	7102.04	7102	7102	7138.36
619.589	9841.8	9886.6	9014	9006.69	9893.92		614.407	7148.33	7183.89	7148.37	7148.33	7148.33	7183.92
619.489	10017	10003.3	9013.16	9008.1	10008.3		614.307	7094.67	7129.45	7094.7	7094.67	7094.67	7129.48
619.389	10125.2	10102.4	9012.95	9009.51	10105.9		614.207	7122.33	7156.38	7122.36	7122.33	7122.33	7156.41
619.289	10164.6	10175.4	9013.21	9010.92	10177.7		614.107	7119.33	7152.74	7119.36	7119.33	7119.33	7152.77
619.189	10211	10215.3	9013.83	9012.33	10216.8		614.007	7043	7075.77	7043.02	7043	7043	7075.79
619.089	10212.6	10218	9014.7	9013.74	10219		613.907	7108.33	7140.47	7108.35	7108.33	7108.33	7140.49
618.989	10180.1	10183.5	9015.76	9015.15	10184.2		613.807	7137	7168.5	7137.02	7137	7137	7168.51
618.889	10150.1	10115.5	9016.93	9016.56	10115.8		613.707	7101.33	7132.19	7101.35	7101.33	7101.33	7132.21
618.789	10033.4	10020.2	9018.2	9017.97	10020.5		613.607	7069.67	7099.9	7069.68	7069.67	7069.67	7099.92
618.689	9925	9907.33	9019.51	9019.38	9907.47		613.507	7158	7187.7	7158.01	7158	7158	7187.71
618.589	9746.9	9785.84	9020.87	9020.79	9785.92		613.407	7126.33	7155.5	7126.34	7126.33	7126.33	7155.51
618.489	9677.1	9664.05	9022.24	9022.2	9664.1		613.307	7198	7226.63	7198.01	7198	7198	7226.64
618.389	9537.6	9548.6	9023.63	9023.61	9548.63		613.207	7135.33	7163.43	7135.34	7135.33	7135.33	7163.44
618.289	9428.2	9444.15	9025.03	9025.02	9444.16		613.107	7111	7138.56	7111.01	7111	7111	7138.57
618.189	9333.2	9353.63	9026.43	9026.43	9353.64		613.007	7081.33	7108.36	7081.34	7081.33	7081.33	7108.37
618.089	9295.3	9277.77	9027.84	9027.84	9277.78		612.907	7106.33	7132.91	7106.34	7106.33	7106.33	7132.92
617.989	9221.3	9216.17	9029.25	9029.25	9216.17		612.807	7127	7153.12	7127.01	7127	7127	7153.13
617.889	9125.9	9167.62	9030.66	9030.65	9167.62		612.707	7132	7157.67	7132.01	7132	7132	7157.68
617.789	9144.8	9130.42	9032.06	9032.06	9130.42		612.607	7165.67	7190.89	7165.67	7165.67	7165.67	7190.89
617.689	9090.1	9102.73	9033.47	9033.47	9102.73		612.507	7118.67	7143.44	7118.67	7118.67	7118.67	7143.44
617.589	9101.8	9082.79	9034.88	9034.88	9082.79		612.407	7154	7178.32	7154	7154	7154	7178.32
617.489	9089.4	9068.84	9036.29	9036.29	9068.84		612.307	7125.33	7149.25	7125.34	7125.33	7125.33	7149.26
617.389	9129.4	9059.4	9037.7	9037.7	9059.4		612.207	7072.67	7096.2	7072.67	7072.67	7072.67	7096.21
617.289	9099.4	9053.31	9039.11	9039.11	9053.31		612.107	7159.67	7182.82	7159.67	7159.67	7159.67	7182.82
617.189	9055.9	9049.64	9040.52	9040.52	9049.64		612.007	7142.67	7165.43	7142.67	7142.67	7142.67	7165.44
617.089	9094.3	9047.67	9041.93	9041.93	9047.67		611.907	7077.67	7100.05	7077.67	7077.67	7077.67	7100.05
616.989	9079.4	9046.9	9043.34	9043.34	9046.9		611.807	7079	7100.99	7079	7079	7079	7101
616.889	9091.8	9046.92	9044.75	9044.75	9046.92		611.707	7078.33	7099.98	7078.34	7078.33	7078.33	7099.98
616.789	9078.5	9047.46	9046.16	9046.16	9047.46		611.607	7122.67	7143.98	7122.67	7122.67	7122.67	7143.98
616.689	9061	9048.33	9047.57	9047.57	9048.33		611.507	7158	7178.98	7158	7158	7158	7178.98
616.589	9050.1	9049.42	9048.98	9048.98	9049.42		611.407	7147.67	7168.32	7147.67	7147.67	7147.67	7168.32
616.489	9062.2	9050.64	9050.39	9050.39	9050.64		611.307	7119.67	7139.99	7119.67	7119.67	7119.67	7139.99
616.389	9063.4	9051.94	9051.8	9051.8	9051.94		611.207	7073.67	7093.65	7073.67	7073.67	7073.67	7093.66
616.289	9044.6	9053.28	9053.21	9053.21	9053.28		611.107	7056.67	7076.35	7056.67	7056.67	7056.67	7076.35
616.189	9075.4	9054.66	9054.62	9054.62	9054.66		611.007	7103.33	7122.73	7103.33	7103.33	7103.33	7122.73
616.089	9057.8	9056.05	9056.03	9056.03	9056.05		610.907	7161.33	7180.44	7161.33	7161.33	7161.33	7180.44
615.989	9091.9	9057.45	9057.44	9057.44	9057.45		610.807	7093.33	7112.15	7093.33	7093.33	7093.33	7112.15
615.889	9141.3	9058.85	9058.85	9058.85	9058.85		610.707	7078.67	7097.2	7078.67	7078.67	7078.67	7097.2
615.789	9047.9	9060.26	9060.26	9060.26	9060.26		610.607	7132.67	7150.91	7132.67	7132.67	7132.67	7150.91
615.689	9090	9061.67	9061.67	9061.67	9061.67		610.507	7135	7152.97	7135	7135	7135	7152.97
615.589	9051.5	9063.08	9063.08	9063.08	9063.08		610.407	7211	7228.72	7211	7211	7211	7228.72
615.489	9057.7	9064.49	9064.49	9064.49	9064.49		610.307	7149.33	7166.8	7149.33	7149.33	7149.33	7166.8
615.389	9074.7	9074.7	9074.7	9074.7	9074.7		610.207	7145.67	7162.89	7145.67	7145.67	7145.67	7162.89
615.289	9060.8	9060.8	9060.8	9060.8	9060.8		610.107	7108	7124.97	7108	7108	7108	7124.97
615.189	9068.8	9068.8	9068.8	9068.8	9068.8		610.007	7147	7163.72	7147	7147	7147	7163.72
615.089	9081.9	9081.9	9081.9	9081.9	9081.9		609.907	7195.33	7211.81	7195.33	7195.33	7195.33	7211.81
614.989	9048.1	9048.1	9048.1	9048.1	9048.1		609.807	7138.33	7154.59	7138.33	7138.33	7138.33	7154.59
614.889	9043.3	9043.3	9043.3	9043.3	9043.3		609.707	7155.67	7171.7	7155.67	7155.67	7155.67	7171.7
614.789	9074.3	9074.3	9074.3	9074.3	9074.3		609.607	7163.33	7179.15	7163.33	7163.33	7163.33	7179.15
614.689	9097.8	9097.8	9097.8	9097.8	9097.8		609.507	7153.67	7169.26	7153.67	7153.67	7153.67	7169.26
614.589	9118.5	9118.5	9118.5	9118.5	9118.5		609.407	7118	7133.38	7118	7118	7118	7133.38
614.489	9111.7	9111.7	9111.7	9111.7	9111.7		609.307	7123.67	7138.83	7123.67	7123.67	7123.67	7138.83
614.389	9092.8	9092.8	9092.8	9092.8	9092.8		609.207	7164.67	7179.63	7164.67	7164.67	7164.67	7179.63
614.289	9034.4	9034.4	9034.4	9034.4	9034.4		609.107	7104	7118.77	7104	7104	7104	7118.77
614.189	9057.5	9057.5	9057.5	9057.5	9057.5		609.007	7090.33	7104.91	7090.33	7090.33	7090.33	7104.91
614.089	9100.7	9100.7	9100.7	9100.7	9100.7		608.907	7194.33	7208.72	7194.33	7194.33	7194.33	7208.72
613.989	9088.6	9088.6	9088.6	9088.6	9088.6		608.807	7182	7196.19	7182	7182	7182	7196.19
613.889	9134.9	9134.9	9134.9	9134.9	9134.9		608.707	7144	7158	7144	7144	7144	7158
613.789	9130.9	9130.9	9130.9	9130.9	9130.9		608.607	7198.67	7212.49	7198.67	7198.67	7198.67	7212.49
613.689	9097.9	9097.9	9097.9	9097.9	9097.9		608.507	7155	7168.65	7155	7155	7155	7168.65
613.589	9103.4	9103.4	9103.4	9103.4	9103.4		608.407	7095.67	7109.15	7095.67	7095.67	7095.67	7109.15
613.489	9118.1	9118.1	9118.1	9118.1	9118.1		608.307	7112.67	7125.97	7112.67	7112.67	7112.67	7125.97
613.389	9121.6	9121.6	9121.6	9121.6	9121.6		608.207	7122	7135.14	7122	7122	7122	7135.14
613.289	9121.8	9121.8	9121.8	9121.8	9121.8		608.107	7173.67	7186.63	7173.67	7173.67	7173.67	7186.63
613.189	9090.5	9090.5	9090.5	9090.5	9090.5		608.007	7212.67	7225.47	7212.67	7212.67	7212.67	7225.47
613.089	9139.2	9139.2	9139.2	9139.2	9139.2		607.907	7154	7166.65	7154	7154	7154	7166.65
612.989	9115.2	9115.2	9115.2	9115.2	9115.2		607.807	7163.33	7175.83	7163.33	7163.33	7163.33	7175.83
612.889	9149.2	9149.2	9149.2	9149.2	9149.2		607.707	7069.33	7081.68	7069.33	7069.33	7069.33	7081.68
612.789	9117.9	9117.9	9117.9	9117.9	9117.9		607.607	7118.33	7130.53	7118.33	7118.33	7118.33	7130.53
612.689	9116.1	9116.1	9116.1	9116.1	9116.1		607.507	7160.67	7172.71	7160.67	7160.67	7160.67	7172.71
612.589	9145.2	9145.2	9145.2	9145.2	9145.2		607.407	7148.67	7160.57	7148.67	7148.67	7148.67	7160.57
612.489	9087.6	9087.6	9087.6	9087.6	9087.6		607.307	7166.33	7178.1	7166.33	7166.33	7166.33	7178.1
612.389	9128.7	9128.7	9128.7	9128.7	9128.7		607.207	7161.67	7173.29	7161.67	7161.67	7161.67	7173.29
612.289	9122.8	9122.8	9122.8	9122.8	9122.8		607.107	7093.67	7105.15	7093.67	7093.67	7093.67	7105.15
612.189	9080.4	9080.4	9080.4	9080.4	9080.4		607.007	7168	7179.35	7168	7168	7168	7179.35
612.089	9132.4	9132.4	9132.4	9132.4	9132.4
611.989	9171.6	9171.6	9171.6	9171.6	9171.6
611.889	9163.6	9163.6	9163.6	9163.6	9163.6
611.789	9150.1	9150.1	9150.1	9150.1	9150.1
611.689	9136.8	9136.8	9136.8	9136.8	9136.8
611.589	9179.4	9179.4	9179.4	9179.4	9179.4
611.489	9166.3	9166.3	9166.3	9166.3	9166.3
611.389	9162.3	9162.3	9162.3	9162.3	9162.3
611.289	9151.5	9151.5	9151.5	9151.5	9151.5
611.189	9183.6	9183.6	9183.6	9183.6	9183.6
611.089	9213.7	9213.7	9213.7	9213.7	9213.7
610.989	9150.2	9150.2	9150.2	9150.2	9150.2
610.889	9172.7	9172.7	9172.7	9172.7	9172.7
610.789	9135.1	9135.1	9135.1	9135.1	9135.1
610.689	9177	9177	9177	9177	9177
610.589	9192.5	9192.5	9192.5	9192.5	9192.5
610.489	9208.6	9208.6	9208.6	9208.6	9208.6
610.389	9167.9	9167.9	9167.9	9167.9	9167.9
610.289	9160.9	9160.9	9160.9	9160.9	9160.9
610.189	9176.5	9176.5	9176.5	9176.5	9176.5
610.089	9151.1	9151.1	9151.1	9151.1	9151.1
609.989	9180.6	9180.6	9180.6	9180.6	9180.6
609.889	9129	9129	9129	9129	9129
609.789	9169.2	9169.2	9169.2	9169.2	9169.2
609.689	9199.6	9199.6	9199.6	9199.6	9199.6
609.589	9183.2	9183.2	9183.2	9183.2	9183.2
609.489	9165	9165	9165	9165	9165
609.389	9206.7	9206.7	9206.7	9206.7	9206.7
609.289	9178.4	9178.4	9178.4	9178.4	9178.4
609.189	9222.2	9222.2	9222.2	9222.2	9222.2
609.089	9236.7	9236.7	9236.7	9236.7	9236.7
608.989	9241.1	9241.1	9241.1	9241.1	9241.1
608.889	9228.9	9228.9	9228.9	9228.9	9228.9
608.789	9240.4	9240.4	9240.4	9240.4	9240.4
608.689	9237.4	9237.4	9237.4	9237.4	9237.4
608.589	9193.6	9193.6	9193.6	9193.6	9193.6
608.489	9194.8	9194.8	9194.8	9194.8	9194.8
608.389	9181.9	9181.9	9181.9	9181.9	9181.9
608.289	9235.6	9235.6	9235.6	9235.6	9235.6
608.189	9281.5	9281.5	9281.5	9281.5	9281.5
608.089	9250.2	9250.2	9250.2	9250.2	9250.2
607.989	9254.4	9254.4	9254.4	9254.4	9254.4
607.889	9263.9	9263.9	9263.9	9263.9	9263.9
607.789	9184	9184	9184	9184	9184
607.689	9187.9	9187.9	9187.9	9187.9	9187.9
607.589	9231	9231	9231	9231	9231
607.489	9199.5	9199.5	9199.5	9199.5	9199.5
607.389	9244	9244	9244	9244	9244
607.289	9256.7	9256.7	9256.7	9256.7	9256.7
607.189	9226.5	9226.5	9226.5	9226.5	9226.5
607.089	9240.7	9240.7	9240.7	9240.7	9240.7
606.989	9217.5	9217.5	9217.5	9217.5	9217.5
606.889	9255.3	9255.3	9255.3	9255.3	9255.3
606.789	9265.6	9265.6	9265.6	9265.6	9265.6
606.689	9236.2	9236.2	9236.2	9236.2	9236.2
606.589	9254.8	9254.8	9254.8	9254.8	9254.8
606.489	9275.7	9275.7	9275.7	9275.7	9275.7
606.389	9265.8	9265.8	9265.8	9265.8	9265.8
606.289	9231.6	9231.6	9231.6	9231.6	9231.6
606.189	9252.2	9252.2	9252.2	9252.2	9252.2
606.089	9256.8	9256.8	9256.8	9256.8	9256.8
605.989	9253.7	9253.7	9253.7	9253.7	9253.7
605.889	9260.3	9260.3	9260.3	9260.3	9260.3
605.789	9317.8	9317.8	9317.8	9317.8	9317.8
605.689	9262.2	9262.2	9262.2	9262.2	9262.2
605.589	9265.1	9265.1	9265.1	9265.1	9265.1
605.489	9286.7	9286.7	9286.7	9286.7	9286.7
605.389	9270.5	9270.5	9270.5	9270.5	9270.5
605.289	9273.5	9273.5	9273.5	9273.5	9273.5
605.189	9299.5	9299.5	9299.5	9299.5	9299.5
605.089	9290.7	9290.7	9290.7	9290.7	9290.7
604.989	9324.4	9324.4	9324.4	9324.4	9324.4
604.889	9289.7	9289.7	9289.7	9289.7	9289.7
604.789	9330.2	9330.2	9330.2	9330.2	9330.2
604.689	9301.6	9301.6	9301.6	9301.6	9301.6
604.589	9279.8	9279.8	9279.8	9279.8	9279.8
604.489	9253.9	9253.9	9253.9	9253.9	9253.9
604.389	9307.5	9307.5	9307.5	9307.5	9307.5
604.289	9322.7	9322.7	9322.7	9322.7	9322.7
604.189	9331.7	9331.7	9331.7	9331.7	9331.7
604.089	9305	9305	9305	9305	9305
603.989	9304.4	9304.4	9304.4	9304.4	9304.4
603.889	9303.1	9303.1	9303.1	9303.1	9303.1
603.789	9301.6	9301.6	9301.6	9301.6	9301.6
603.689	9302.2	9302.2	9302.2	9302.2	9302.2
603.589	9298	9298	9298	9298	9298
603.489	9333.5	9333.5	9333.5	9333.5	9333.5
603.389	9379.4	9379.4	9379.4	9379.4	9379.4
603.289	9344	9344	9344	9344	9344
603.189	9330.3	9330.3	9330.3	9330.3	9330.3
603.089	9298.5	9298.5	9298.5	9298.5	9298.5
602.989	9331.8	9331.8	9331.8	9331.8	9331.8
602.889	9356.6	9356.6	9356.6	9356.6	9356.6
602.789	9293	9293	9293	9293	9293
602.689	9311.6	9311.6	9311.6	9311.6	9311.6
602.589	9307.2	9307.2	9307.2	9307.2	9307.2
602.489	9353.7	9353.7	9353.7	9353.7	9353.7
602.389	9329	9329	9329	9329	9329
602.289	9308.1	9308.1	9308.1	9308.1	9308.1
602.189	9311.3	9311.3	9311.3	9311.3	9311.3

## Sheet: C20 XPS spectra
C20-1							C20-2								C20-3
BE (eV)	Spectra	I-	I0	background	simulation		BE (eV)	Spectra	I5+	I-	I0	background	simulation		BE (eV)	Spectra	I-	I5+	I0	background	simulation
652.072	6211.88	6211.88	6211.88	6211.88	6211.88		647.031	7210.33	7211.61	7210.48	7210.65	7210.33	7212.07		643.504	8142.73	8143.14	8142.75	8142.73	8142.73	8143.16
651.972	6185.13	6185.13	6185.13	6185.13	6185.13		646.931	7201	7202.28	7201.14	7201.32	7201	7202.75		643.404	8110.6	8111.01	8110.62	8110.6	8110.6	8111.03
651.872	6159.25	6159.25	6159.25	6159.25	6159.25		646.831	7208	7209.3	7208.14	7208.33	7208	7209.77		643.304	8105.27	8105.68	8105.29	8105.27	8105.27	8105.7
651.772	6198	6198	6198	6198	6198		646.731	7237	7238.31	7237.15	7237.33	7237	7238.78		643.204	8116.67	8117.09	8116.69	8116.67	8116.67	8117.11
651.672	6172.5	6172.5	6172.5	6172.5	6172.5		646.631	7203.33	7204.66	7203.48	7203.67	7203.33	7205.13		643.104	8122.13	8122.56	8122.15	8122.13	8122.13	8122.58
651.572	6208.38	6208.38	6208.38	6208.38	6208.38		646.531	7276.67	7278	7276.81	7277	7276.67	7278.48		643.004	8121.87	8122.3	8121.89	8121.87	8121.87	8122.32
651.472	6223.13	6223.13	6223.13	6223.13	6223.13		646.431	7245.67	7247.01	7245.82	7246	7245.67	7247.5		642.904	8114.2	8114.63	8114.22	8114.2	8114.2	8114.66
651.372	6189.5	6189.5	6189.5	6189.5	6189.5		646.331	7212.33	7213.7	7212.48	7212.67	7212.33	7214.19		642.804	8062.93	8063.37	8062.95	8062.93	8062.93	8063.39
651.272	6197	6197	6197	6197	6197		646.231	7279	7280.38	7279.15	7279.34	7279	7280.87		642.704	8071.73	8072.18	8071.75	8071.73	8071.73	8072.2
651.172	6199.88	6199.88	6199.88	6199.88	6199.88		646.131	7220	7221.39	7220.15	7220.35	7220	7221.89		642.604	8095.87	8096.32	8095.89	8095.87	8095.87	8096.34
651.072	6204.25	6204.25	6204.25	6204.25	6204.25		646.031	7252.67	7254.07	7252.82	7253.02	7252.67	7254.57		642.504	8094.67	8095.12	8094.69	8094.67	8094.67	8095.14
650.972	6220.75	6220.75	6220.75	6220.75	6220.75		645.931	7304.33	7305.75	7304.49	7304.69	7304.33	7306.26		642.404	8082.33	8082.79	8082.36	8082.33	8082.33	8082.82
650.872	6201	6201	6201	6201	6201		645.831	7221.67	7223.1	7221.82	7222.02	7221.67	7223.61		642.304	8089.33	8089.8	8089.36	8089.33	8089.33	8089.82
650.772	6236.13	6236.13	6236.13	6236.13	6236.13		645.731	7190.33	7191.78	7190.49	7190.69	7190.33	7192.3		642.204	8098.13	8098.6	8098.16	8098.13	8098.13	8098.63
650.672	6258.75	6258.75	6258.75	6258.75	6258.75		645.631	7183.33	7184.79	7183.49	7183.7	7183.33	7185.32		642.104	8108.4	8108.88	8108.42	8108.4	8108.4	8108.9
650.572	6260.25	6260.25	6260.25	6260.25	6260.25		645.531	7177	7178.48	7177.16	7177.37	7177	7179		642.004	8094.33	8094.81	8094.36	8094.33	8094.33	8094.84
650.472	6230.38	6230.38	6230.38	6230.38	6230.38		645.431	7157	7158.49	7157.16	7157.37	7157	7159.02		641.904	8100.73	8101.22	8100.76	8100.73	8100.73	8101.25
650.372	6240.13	6240.13	6240.13	6240.13	6240.13		645.331	7161	7162.51	7161.16	7161.37	7161	7163.04		641.804	8070.67	8071.16	8070.69	8070.67	8070.67	8071.18
650.272	6238	6238	6238	6238	6238		645.231	7159.33	7160.86	7159.5	7159.71	7159.33	7161.4		641.704	8073.53	8074.03	8073.56	8073.53	8073.53	8074.06
650.172	6216.25	6216.25	6216.25	6216.25	6216.25		645.131	7145	7146.54	7145.17	7145.38	7145	7147.08		641.604	8060.2	8060.7	8060.23	8060.2	8060.2	8060.73
650.072	6190.88	6190.88	6190.88	6190.88	6190.88		645.031	7211.33	7212.89	7211.5	7211.72	7211.33	7213.44		641.504	8058.8	8059.31	8058.83	8058.8	8058.8	8059.34
649.972	6224.63	6224.63	6224.63	6224.63	6224.63		644.931	7160	7161.57	7160.17	7160.39	7160	7162.13		641.404	8061.53	8062.05	8061.56	8061.53	8061.53	8062.08
649.872	6223	6223	6223	6223	6223		644.831	7123.33	7124.92	7123.5	7123.72	7123.33	7125.48		641.304	8075.73	8076.25	8075.76	8075.73	8075.73	8076.28
649.772	6189.38	6189.38	6189.38	6189.38	6189.38		644.731	7108.67	7110.27	7108.84	7109.06	7108.67	7110.84		641.204	8094.6	8095.13	8094.63	8094.6	8094.6	8095.16
649.672	6182.38	6182.38	6182.38	6182.38	6182.38		644.631	7109.67	7111.29	7109.84	7110.06	7109.67	7111.86		641.104	8065.6	8066.13	8065.63	8065.6	8065.6	8066.16
649.572	6227.38	6227.38	6227.38	6227.38	6227.38		644.531	7000.67	7002.31	7000.84	7001.07	7000.67	7002.88		641.004	8044.6	8045.14	8044.63	8044.6	8044.6	8045.17
649.472	6200.75	6200.75	6200.75	6200.75	6200.75		644.431	7099	7100.66	7099.18	7099.4	7099	7101.24		640.904	8044.6	8045.15	8044.63	8044.6	8044.6	8045.18
649.372	6201	6201	6201	6201	6201		644.331	7143	7144.68	7143.18	7143.41	7143	7145.26		640.804	8082.93	8083.49	8082.97	8082.93	8082.93	8083.52
649.272	6227.5	6227.5	6227.5	6227.5	6227.5		644.231	7082	7083.69	7082.18	7082.41	7082	7084.29		640.704	8064.27	8064.83	8064.3	8064.27	8064.27	8064.86
649.172	6223.13	6223.13	6223.13	6223.13	6223.13		644.131	6998	6999.71	6998.18	6998.42	6998	7000.31		640.604	8081.67	8082.23	8081.7	8081.67	8081.67	8082.27
649.072	6234.13	6234.13	6234.13	6234.13	6234.13		644.031	6987	6988.73	6987.18	6987.42	6987	6989.33		640.504	8081.53	8082.11	8081.57	8081.53	8081.53	8082.14
648.972	6235.5	6235.5	6235.5	6235.5	6235.5		643.931	7073.67	7075.42	7073.85	7074.09	7073.67	7076.03		640.404	8028.47	8029.05	8028.5	8028.47	8028.47	8029.08
648.872	6214.13	6214.13	6214.13	6214.13	6214.13		643.831	7122.33	7124.1	7122.52	7122.76	7122.33	7124.72		640.304	8012.87	8013.45	8012.9	8012.87	8012.87	8013.49
648.772	6223.63	6223.63	6223.63	6223.63	6223.63		643.731	7032.67	7034.46	7032.85	7033.1	7032.67	7035.08		640.204	8061.93	8062.53	8061.97	8061.93	8061.93	8062.56
648.672	6262.88	6262.88	6262.88	6262.88	6262.88		643.631	7072	7073.81	7072.19	7072.44	7072	7074.44		640.104	8046.8	8047.4	8046.84	8046.8	8046.8	8047.44
648.572	6229.75	6229.75	6229.75	6229.75	6229.75		643.531	7061.33	7063.16	7061.52	7061.78	7061.33	7063.8		640.004	8017.8	8018.41	8017.84	8017.8	8017.8	8018.45
648.472	6221	6221	6221	6221	6221		643.431	7030	7031.85	7030.19	7030.45	7030	7032.49		639.904	8000.67	8001.28	8000.71	8000.67	8000.67	8001.32
648.372	6247.25	6247.25	6247.25	6247.25	6247.25		643.331	7069.67	7071.54	7069.86	7070.12	7069.67	7072.18		639.804	8008.73	8009.36	8008.77	8008.73	8008.73	8009.4
648.272	6230.5	6230.5	6230.5	6230.5	6230.5		643.231	7074.67	7076.56	7074.86	7075.12	7074.67	7077.21		639.704	8016.87	8017.5	8016.91	8016.87	8016.87	8017.54
648.172	6254.88	6254.88	6254.88	6254.88	6254.88		643.131	7085.33	7087.25	7085.53	7085.79	7085.33	7087.91		639.604	7994.73	7995.38	7994.78	7994.73	7994.73	7995.42
648.072	6248.88	6248.88	6248.88	6248.88	6248.88		643.031	7004	7005.94	7004.2	7004.46	7004	7006.6		639.504	7987.33	7987.98	7987.38	7987.33	7987.33	7988.03
647.972	6233.13	6233.13	6233.13	6233.13	6233.13		642.931	7003.33	7005.3	7003.53	7003.8	7003.33	7005.97		639.404	7986.33	7986.99	7986.38	7986.33	7986.33	7987.04
647.872	6272.25	6272.25	6272.25	6272.25	6272.25		642.831	6939.67	6941.65	6939.87	6940.14	6939.67	6942.33		639.304	7988.07	7988.73	7988.11	7988.07	7988.07	7988.78
647.772	6272.5	6272.5	6272.5	6272.5	6272.5		642.731	6939.67	6941.67	6939.87	6940.15	6939.67	6942.36		639.204	7955.13	7955.81	7955.18	7955.13	7955.13	7955.86
647.672	6239.25	6239.25	6239.25	6239.25	6239.25		642.631	6979.67	6981.7	6979.87	6980.15	6979.67	6982.39		639.104	7983.93	7984.62	7983.98	7983.93	7983.93	7984.66
647.572	6271.5	6271.5	6271.5	6271.5	6271.5		642.531	6925.67	6927.72	6925.88	6926.16	6925.67	6928.42		639.004	7999.87	8000.56	7999.92	7999.87	7999.87	8000.61
647.472	6279.5	6279.5	6279.5	6279.5	6279.5		642.431	6910.67	6912.75	6910.88	6911.16	6910.67	6913.45		638.904	7937.87	7938.57	7937.92	7937.87	7937.87	7938.62
647.372	6256	6256	6256	6256	6256		642.331	6935.67	6937.77	6935.88	6936.17	6935.67	6938.49		638.804	7946.8	7947.51	7946.85	7946.8	7946.8	7947.56
647.272	6240.38	6240.38	6240.38	6240.38	6240.38		642.231	6976.33	6978.47	6976.55	6976.84	6976.33	6979.18		638.704	7931.8	7932.52	7931.85	7931.8	7931.8	7932.57
647.172	6261.63	6261.63	6261.63	6261.63	6261.63		642.131	6947	6949.16	6947.22	6947.51	6947	6949.88		638.604	7940.93	7941.66	7940.99	7940.93	7940.93	7941.72
647.072	6216.13	6216.13	6216.13	6216.13	6216.13		642.031	6859.67	6861.85	6859.89	6860.18	6859.67	6862.58		638.504	7967.73	7968.47	7967.79	7967.73	7967.73	7968.53
646.972	6243.38	6243.38	6243.38	6243.38	6243.38		641.931	6825.33	6827.55	6825.55	6825.85	6825.33	6828.29		638.404	7961.33	7962.08	7961.39	7961.33	7961.33	7962.14
646.872	6208.25	6208.25	6208.25	6208.25	6208.25		641.831	6872	6874.24	6872.22	6872.53	6872	6874.99		638.304	7967.33	7968.1	7967.39	7967.33	7967.33	7968.15
646.772	6232.88	6232.88	6232.88	6232.88	6232.88		641.731	6919	6921.27	6919.22	6919.53	6919	6922.03		638.204	7978.73	7979.51	7978.79	7978.73	7978.73	7979.57
646.672	6299.38	6299.38	6299.38	6299.38	6299.38		641.631	6996.67	6998.96	6996.89	6997.2	6996.67	6999.73		638.104	7991.07	7991.85	7991.13	7991.07	7991.07	7991.91
646.572	6270.75	6270.75	6270.75	6270.75	6270.75		641.531	6875.67	6877.99	6875.9	6876.21	6875.67	6878.76		638.004	7979.93	7980.73	7980	7979.93	7979.93	7980.79
646.472	6295.5	6295.5	6295.5	6295.5	6295.5		641.431	6931	6933.35	6931.23	6931.55	6931	6934.14		637.904	7970.6	7971.4	7970.67	7970.6	7970.6	7971.47
646.372	6269.25	6269.25	6269.25	6269.25	6269.25		641.331	6892.67	6895.05	6892.9	6893.22	6892.67	6895.84		637.804	7938.67	7939.48	7938.73	7938.67	7938.67	7939.55
646.272	6288	6288	6288	6288	6288		641.231	6956.67	6959.08	6956.9	6957.23	6956.67	6959.88		637.704	7988.6	7989.43	7988.67	7988.6	7988.6	7989.49
646.172	6315.13	6315.13	6315.13	6315.13	6315.13		641.131	6894.33	6896.78	6894.57	6894.9	6894.33	6897.59		637.604	8024.6	8025.44	8024.67	8024.6	8024.6	8025.51
646.072	6292.25	6292.25	6292.25	6292.25	6292.25		641.031	6897.67	6900.15	6897.91	6898.24	6897.67	6900.96		637.504	8060.33	8061.18	8060.41	8060.33	8060.33	8061.25
645.972	6268.75	6268.75	6268.75	6268.75	6268.75		640.931	6975.67	6978.18	6975.91	6976.25	6975.67	6979		637.404	8058.13	8058.99	8058.21	8058.13	8058.13	8059.06
645.872	6309.38	6309.38	6309.38	6309.38	6309.38		640.831	6822.33	6824.88	6822.58	6822.92	6822.33	6825.71		637.304	8107.53	8108.4	8107.61	8107.53	8107.53	8108.48
645.772	6312.63	6312.63	6312.63	6312.63	6312.63		640.731	6832.67	6835.25	6832.91	6833.26	6832.67	6836.09		637.204	8179.53	8180.42	8179.61	8179.53	8179.53	8180.5
645.672	6309.25	6309.25	6309.25	6309.25	6309.25		640.631	6848.67	6851.28	6848.92	6849.27	6848.67	6852.13		637.104	8244.67	8245.57	8244.75	8244.67	8244.67	8245.65
645.572	6278.75	6278.75	6278.75	6278.75	6278.75		640.531	6760.33	6762.98	6760.59	6760.94	6760.33	6763.84		637.004	8295.47	8296.38	8295.55	8295.47	8295.47	8296.46
645.472	6314.88	6314.88	6314.88	6314.88	6314.88		640.431	6897.33	6900.02	6897.59	6897.95	6897.33	6900.89		636.904	8372	8372.93	8372.09	8372	8372	8373.01
645.372	6298.88	6298.88	6298.88	6298.88	6298.88		640.331	6865	6867.72	6865.26	6865.62	6865	6868.6		636.804	8485.73	8486.67	8485.82	8485.73	8485.73	8486.76
645.272	6277	6277	6277	6277	6277		640.231	6785	6787.76	6785.26	6785.63	6785	6788.65		636.704	8671.53	8672.49	8671.63	8671.53	8671.53	8672.58
645.172	6287.75	6287.75	6287.75	6287.75	6287.75		640.131	6855	6857.8	6855.26	6855.64	6855	6858.7		636.604	8819.8	8820.77	8819.89	8819.8	8819.8	8820.86
645.072	6288	6288	6288	6288	6288		640.031	6803	6805.84	6803.27	6803.64	6803	6806.75		636.504	8952.07	8953.05	8952.16	8952.07	8952.07	8953.15
644.972	6349.13	6349.13	6349.13	6349.13	6349.13		639.931	6838.67	6841.54	6838.94	6839.32	6838.67	6842.46		636.404	9155.2	9156.2	9155.3	9155.2	9155.2	9156.3
644.872	6319.38	6319.38	6319.38	6319.38	6319.38		639.831	6831.67	6834.58	6831.94	6832.33	6831.67	6835.51		636.304	9305.67	9306.68	9305.77	9305.67	9305.67	9306.78
644.772	6334	6334	6334	6334	6334		639.731	6864.33	6867.29	6864.61	6865	6864.33	6868.23		636.204	9503.73	9504.76	9503.84	9503.73	9503.73	9504.87
644.672	6338.75	6338.75	6338.75	6338.75	6338.75		639.631	6910.33	6913.33	6910.61	6911.01	6910.33	6914.28		636.104	9589.4	9590.44	9589.51	9589.4	9589.4	9590.55
644.572	6313.38	6313.38	6313.38	6313.38	6313.38		639.531	6859.67	6862.71	6859.95	6860.35	6859.67	6863.67		636.004	9686.4	9687.45	9686.51	9686.4	9686.4	9687.57
644.472	6289.25	6289.25	6289.25	6289.25	6289.25		639.431	6775.33	6778.42	6775.62	6776.02	6775.33	6779.39		635.904	9727.73	9728.81	9727.85	9727.73	9727.73	9728.92
644.372	6340.38	6340.38	6340.38	6340.38	6340.38		639.331	6797	6800.13	6797.29	6797.7	6797	6801.12		635.804	9720.47	9721.56	9720.58	9720.47	9720.47	9721.68
644.272	6329	6329	6329	6329	6329		639.231	6834	6837.18	6834.29	6834.71	6834	6838.17		635.704	9639.6	9640.71	9639.72	9639.6	9639.6	9640.83
644.172	6318.25	6318.25	6318.25	6318.25	6318.25		639.131	6794.67	6797.89	6794.96	6795.38	6794.67	6798.9		635.604	9540.67	9541.8	9540.79	9540.67	9540.67	9541.92
644.072	6373.63	6373.63	6373.63	6373.63	6373.63		639.031	6802.67	6805.93	6802.96	6803.39	6802.67	6806.96		635.504	9368.53	9369.68	9368.67	9368.53	9368.53	9369.81
643.972	6334	6334	6334	6334	6334		638.931	6796.33	6799.65	6796.63	6797.07	6796.33	6800.69		635.404	9221.6	9222.77	9221.74	9221.6	9221.6	9222.91
643.872	6380.88	6380.88	6380.88	6380.88	6380.88		638.831	6752	6755.37	6752.3	6752.75	6752	6756.42		635.304	9087.07	9088.25	9087.21	9087.07	9087.07	9088.4
643.772	6313.63	6313.63	6313.63	6313.63	6313.63		638.731	6757	6760.42	6757.31	6757.76	6757	6761.48		635.204	8920	8921.21	8920.15	8920	8920	8921.35
643.672	6324.5	6324.5	6324.5	6324.5	6324.5		638.631	6845	6848.47	6845.31	6845.77	6845	6849.55		635.104	8788.93	8790.16	8789.09	8788.93	8788.93	8790.31
643.572	6324.25	6324.25	6324.25	6324.25	6324.25		638.531	6861	6864.52	6861.31	6861.77	6861	6865.61		635.004	8641.93	8643.18	8642.09	8641.93	8641.93	8643.33
643.472	6324.5	6324.5	6324.5	6324.5	6324.5		638.431	6842.33	6845.91	6842.65	6843.12	6842.33	6847.01		634.904	8528.6	8529.86	8528.76	8528.6	8528.6	8530.02
643.372	6320.75	6320.75	6320.75	6320.75	6320.75		638.331	6841.33	6844.96	6841.65	6842.13	6841.33	6846.08		634.804	8440.33	8441.61	8440.5	8440.33	8440.33	8441.78
643.272	6301.5	6301.5	6301.5	6301.5	6301.5		638.231	6828	6831.69	6828.32	6828.8	6828	6832.82		634.704	8361.87	8363.17	8362.04	8361.87	8361.87	8363.34
643.172	6355	6355	6355	6355	6355		638.131	6871.33	6875.08	6871.66	6872.15	6871.33	6876.22		634.604	8298.6	8299.92	8298.78	8298.6	8298.6	8300.09
643.072	6332	6332	6332	6332	6332		638.031	6836.33	6840.14	6836.66	6837.16	6836.33	6841.3		634.504	8252.2	8253.54	8252.38	8252.2	8252.2	8253.73
642.972	6295.75	6295.75	6295.75	6295.75	6295.75		637.931	6888.33	6892.2	6888.67	6889.17	6888.33	6893.37		634.404	8198.4	8199.77	8198.59	8198.4	8198.4	8199.96
642.872	6321	6321	6321	6321	6321		637.831	6922.67	6926.6	6923	6923.51	6922.67	6927.78		634.304	8209	8210.4	8209.2	8209	8209	8210.59
642.772	6314.75	6314.75	6314.75	6314.75	6314.75		637.731	6973.33	6977.33	6973.68	6974.19	6973.33	6978.53		634.204	8181.53	8182.96	8181.74	8181.53	8181.53	8183.16
642.672	6358.88	6358.88	6358.88	6358.88	6358.88		637.631	6995.33	6999.39	6995.68	6996.21	6995.33	7000.61		634.104	8151.2	8152.65	8151.41	8151.2	8151.2	8152.86
642.572	6365.88	6365.88	6365.88	6365.88	6365.88		637.531	7011	7015.13	7011.35	7011.88	7011	7016.36		634.004	8105.67	8107.14	8105.89	8105.67	8105.67	8107.36
642.472	6392.75	6392.75	6392.75	6392.75	6392.75		637.431	6975.67	6979.87	6976.02	6976.56	6975.67	6981.12		633.904	8101.13	8102.63	8101.36	8101.13	8101.13	8102.86
642.372	6372.25	6372.25	6372.25	6372.25	6372.25		637.331	6984.33	6988.6	6984.69	6985.24	6984.33	6989.87		633.804	8100.53	8102.06	8100.77	8100.53	8100.53	8102.3
642.272	6323.13	6323.13	6323.13	6323.13	6323.13		637.231	7060	7064.34	7060.36	7060.92	7060	7065.62		633.704	8058.8	8060.35	8059.05	8058.8	8058.8	8060.6
642.172	6308.88	6308.88	6308.88	6308.88	6308.88		637.131	7155	7159.41	7155.37	7155.93	7155	7160.71		633.604	8066.6	8068.18	8066.86	8066.6	8066.6	8068.44
642.072	6315.38	6315.38	6315.38	6315.38	6315.38		637.031	7340.67	7345.15	7341.04	7341.61	7340.67	7346.47		633.504	8089.07	8090.67	8089.33	8089.07	8089.07	8090.94
641.972	6324.5	6324.5	6324.5	6324.5	6324.5		636.931	7312.67	7317.23	7313.04	7313.62	7312.67	7318.57		633.404	8098.07	8099.7	8098.34	8098.07	8098.07	8099.98
641.872	6332.75	6332.75	6332.75	6332.75	6332.75		636.831	7433.33	7437.98	7433.71	7434.3	7433.33	7439.33		633.304	8085.27	8086.93	8085.55	8085.27	8085.27	8087.21
641.772	6326.13	6326.13	6326.13	6326.13	6326.13		636.731	7710	7714.73	7710.39	7710.98	7710	7716.1		633.204	8074.33	8076.02	8074.63	8074.33	8074.33	8076.32
641.672	6294	6294	6294	6294	6294		636.631	8037.33	8042.14	8037.72	8038.33	8037.33	8043.53		633.104	8048.53	8050.25	8048.85	8048.53	8048.53	8050.56
641.572	6325.25	6325.25	6325.25	6325.25	6325.25		636.531	8408.67	8413.56	8409.06	8409.68	8408.67	8414.96		633.004	8107.27	8109.02	8107.59	8107.27	8107.27	8109.35
641.472	6315	6315	6315	6315	6315		636.431	8706.67	8711.65	8707.07	8707.7	8706.67	8713.08		632.904	8069.6	8071.39	8069.94	8069.6	8069.6	8071.73
641.372	6330.88	6330.88	6330.88	6330.88	6330.88		636.331	9117.33	9122.41	9117.74	9118.38	9117.33	9123.86		632.804	8077.6	8079.43	8077.95	8077.6	8077.6	8079.79
641.272	6329.63	6329.63	6329.63	6329.63	6329.63		636.231	9657	9662.17	9657.41	9658.06	9657	9663.64		632.704	8151.4	8153.27	8151.77	8151.4	8151.4	8153.64
641.172	6305.38	6305.38	6305.38	6305.38	6305.38		636.131	10235.7	10240.9	10236.1	10236.7	10235.7	10242.4		632.604	8148.2	8150.11	8148.59	8148.2	8148.2	8150.49
641.072	6331.5	6331.5	6331.5	6331.5	6331.5		636.031	10871.7	10877	10872.1	10872.8	10871.7	10878.5		632.504	8121.93	8123.88	8122.34	8121.93	8121.93	8124.28
640.972	6353.38	6353.38	6353.38	6353.38	6353.38		635.931	11482.3	11487.8	11482.8	11483.4	11482.3	11489.3		632.404	8209.47	8211.45	8209.89	8209.47	8209.47	8211.87
640.872	6312.75	6312.75	6312.75	6312.75	6312.75		635.831	12033.3	12038.9	12033.8	12034.5	12033.3	12040.4		632.304	8230.2	8232.22	8230.64	8230.2	8230.2	8232.66
640.772	6304.63	6304.63	6304.63	6304.63	6304.63		635.731	12482.7	12488.3	12483.1	12483.8	12482.7	12489.9		632.204	8232.27	8234.33	8232.73	8232.27	8232.27	8234.79
640.672	6317.13	6317.13	6317.13	6317.13	6317.13		635.631	12733	12738.8	12733.4	12734.2	12733	12740.4		632.104	8260	8262.1	8260.48	8260	8260	8262.58
640.572	6336.38	6336.38	6336.38	6336.38	6336.38		635.531	12808.3	12814.2	12808.8	12809.5	12808.3	12815.8		632.004	8251.4	8253.53	8251.91	8251.4	8251.4	8254.04
640.472	6284.75	6284.75	6284.75	6284.75	6284.75		635.431	12594	12600	12594.5	12595.2	12594	12601.7		631.904	8298.13	8300.31	8298.67	8298.13	8298.13	8300.84
640.372	6272.5	6272.5	6272.5	6272.5	6272.5		635.331	12355.3	12361.4	12355.8	12356.5	12355.3	12363.1		631.804	8316.33	8318.54	8316.89	8316.33	8316.33	8319.1
640.272	6309.63	6309.63	6309.63	6309.63	6309.63		635.231	11823.3	11829.6	11823.8	11824.6	11823.3	11831.3		631.704	8406.07	8408.32	8406.65	8406.07	8406.07	8408.91
640.172	6325.38	6325.38	6325.38	6325.38	6325.38		635.131	11286	11292.4	11286.5	11287.3	11286	11294.1		631.604	8485.87	8488.18	8486.48	8485.87	8485.87	8488.8
640.072	6306.38	6306.38	6306.38	6306.38	6306.38		635.031	10443.7	10450.2	10444.1	10444.9	10443.7	10451.9		631.504	8586.6	8588.97	8587.25	8586.6	8586.6	8589.62
639.972	6310.63	6310.63	6310.63	6310.63	6310.63		634.931	9889.33	9895.97	9889.82	9890.63	9889.33	9897.76		631.404	8698.33	8700.76	8699.02	8698.33	8698.33	8701.44
639.872	6334.13	6334.13	6334.13	6334.13	6334.13		634.831	9280	9286.77	9280.49	9281.32	9280	9288.59		631.304	8877.93	8880.42	8878.65	8877.93	8877.93	8881.14
639.772	6317.38	6317.38	6317.38	6317.38	6317.38		634.731	8843.33	8850.24	8843.83	8844.68	8843.33	8852.08		631.204	8994.4	8996.94	8995.16	8994.4	8994.4	8997.7
639.672	6371	6371	6371	6371	6371		634.631	8353	8360.04	8353.51	8354.36	8353	8361.91		631.104	9149.47	9152.06	9150.27	9149.47	9149.47	9152.86
639.572	6343	6343	6343	6343	6343		634.531	8061	8068.2	8061.51	8062.39	8061	8070.1		631.004	9317.2	9319.85	9318.05	9317.2	9317.2	9320.7
639.472	6333.5	6333.5	6333.5	6333.5	6333.5		634.431	7790.67	7798.03	7791.19	7792.07	7790.67	7799.96		630.904	9457.13	9459.84	9458.03	9457.13	9457.13	9460.74
639.372	6295.38	6295.38	6295.38	6295.38	6295.38		634.331	7601.67	7609.19	7602.19	7603.1	7601.67	7611.15		630.804	9660.33	9663.1	9661.28	9660.33	9660.33	9664.04
639.272	6305.25	6305.25	6305.25	6305.25	6305.25		634.231	7415	7422.69	7415.54	7416.45	7415	7424.68		630.704	9746.53	9749.36	9747.53	9746.53	9746.53	9750.36
639.172	6336.38	6336.38	6336.38	6336.38	6336.38		634.131	7331.67	7339.52	7332.21	7333.14	7331.67	7341.54		630.604	9811.13	9814.01	9812.19	9811.13	9811.13	9815.07
639.072	6309.88	6309.88	6309.88	6309.88	6309.88		634.031	7206	7214.01	7206.55	7207.5	7206	7216.07		630.504	9817.8	9820.74	9818.92	9817.8	9817.8	9821.86
638.972	6289.5	6289.5	6289.5	6289.5	6289.5		633.931	7112	7120.21	7112.56	7113.53	7112	7122.3		630.404	9777.53	9780.53	9778.72	9777.53	9777.53	9781.72
638.872	6331.38	6331.38	6331.38	6331.38	6331.38		633.831	7112	7120.41	7112.57	7113.56	7112	7122.54		630.304	9646.33	9649.39	9647.6	9646.33	9646.33	9650.66
638.772	6335	6335	6335	6335	6335		633.731	7058.67	7067.27	7059.24	7060.26	7058.67	7069.44		630.204	9549.27	9552.41	9550.61	9549.27	9549.27	9553.76
638.672	6364.5	6364.5	6364.5	6364.5	6364.5		633.631	7001.67	7010.47	7002.25	7003.29	7001.67	7012.67		630.104	9354.33	9357.57	9355.77	9354.33	9354.33	9359
638.572	6354.25	6354.25	6354.25	6354.25	6354.25		633.531	7059.33	7068.33	7059.93	7060.99	7059.33	7070.58		630.004	9137.13	9140.46	9138.66	9137.13	9137.13	9141.99
638.472	6314.13	6314.13	6314.13	6314.13	6314.13		633.431	7029.33	7038.53	7029.93	7031.02	7029.33	7040.81		629.904	8957.13	8960.55	8958.76	8957.13	8957.13	8962.18
638.372	6307.88	6307.88	6307.88	6307.88	6307.88		633.331	7038.67	7048.09	7039.28	7040.38	7038.67	7050.42		629.804	8729.33	8732.84	8731.08	8729.33	8729.33	8734.58
638.272	6332.13	6332.13	6332.13	6332.13	6332.13		633.231	6901.67	6911.34	6902.29	6903.41	6901.67	6913.7		629.704	8545.73	8549.33	8547.6	8545.73	8545.73	8551.19
638.172	6299.38	6299.38	6299.38	6299.38	6299.38		633.131	6859	6868.92	6859.63	6860.77	6859	6871.32		629.604	8432.2	8435.81	8434.2	8432.2	8432.2	8437.8
638.072	6304.38	6304.38	6304.38	6304.38	6304.38		633.031	6867	6877.16	6867.64	6868.8	6867	6879.6		629.504	8296.07	8299.76	8298.21	8296.07	8296.07	8301.9
637.972	6337	6337	6337	6337	6337		632.931	6818.33	6828.74	6818.98	6820.17	6818.33	6831.22		629.404	8200.53	8204.32	8202.83	8200.53	8200.53	8206.62
637.872	6317.38	6317.38	6317.38	6317.38	6317.38		632.831	6815	6825.65	6815.66	6816.86	6815	6828.18		629.304	8132.07	8135.95	8134.54	8132.07	8132.07	8138.42
637.772	6339.25	6339.25	6339.25	6339.25	6339.25		632.731	6869.33	6880.26	6870	6871.24	6869.33	6882.84		629.204	8048.47	8052.45	8051.13	8048.47	8048.47	8055.12
637.672	6325.63	6325.63	6325.63	6325.63	6325.63		632.631	6863.67	6874.9	6864.35	6865.62	6863.67	6877.54		629.104	8023.87	8027.96	8026.74	8023.87	8023.87	8030.83
637.572	6339.25	6339.25	6339.25	6339.25	6339.25		632.531	6870	6881.55	6870.69	6871.99	6870	6884.23		629.004	7935.93	7940.13	7939.04	7935.93	7935.93	7943.23
637.472	6369.75	6369.75	6369.75	6369.75	6369.75		632.431	6888.67	6900.52	6889.37	6890.7	6888.67	6903.26		628.904	7887.6	7891.91	7890.96	7887.6	7887.6	7895.27
637.372	6394.13	6394.13	6394.13	6394.13	6394.13		632.331	6828	6840.17	6828.71	6830.08	6828	6842.96		628.804	7931.4	7935.82	7935.04	7931.4	7931.4	7939.47
637.272	6330.13	6330.13	6330.13	6330.13	6330.13		632.231	6798.33	6810.81	6799.06	6800.46	6798.33	6813.65		628.704	7865.93	7870.48	7869.89	7865.93	7865.93	7874.43
637.172	6314.63	6314.63	6314.63	6314.63	6314.63		632.131	6818	6830.8	6818.74	6820.17	6818	6833.71		628.604	7846.47	7851.14	7850.77	7846.47	7846.47	7855.44
637.072	6326.5	6326.5	6326.5	6326.5	6326.5		632.031	6812.33	6825.53	6813.08	6814.54	6812.33	6828.49		628.504	7844.53	7849.33	7849.23	7844.53	7844.53	7854.03
636.972	6346	6346	6346	6346	6346		631.931	6813.67	6827.26	6814.43	6815.92	6813.67	6830.28		628.404	7819.73	7824.67	7824.86	7819.73	7819.73	7829.8
636.872	6343.75	6343.75	6343.75	6343.75	6343.75		631.831	6733.67	6747.66	6734.44	6735.96	6733.67	6750.73		628.304	7781	7786.07	7786.62	7781	7781	7791.69
636.772	6365.25	6365.25	6365.25	6365.25	6365.25		631.731	6682.33	6696.72	6683.12	6684.67	6682.33	6699.85		628.204	7776.67	7781.88	7782.84	7776.67	7776.67	7788.05
636.672	6343.13	6343.13	6343.13	6343.13	6343.13		631.631	6694	6708.79	6694.8	6696.38	6694	6711.97		628.104	7788.33	7793.7	7795.12	7788.33	7788.33	7800.49
636.572	6355.88	6355.88	6355.88	6355.88	6355.88		631.531	6586.67	6601.85	6587.48	6589.09	6586.67	6605.09		628.004	7833.27	7838.79	7840.76	7833.27	7833.27	7846.28
636.472	6361.38	6361.38	6361.38	6361.38	6361.38		631.431	6611.67	6627.37	6612.5	6614.16	6611.67	6630.69		627.904	7796.8	7802.49	7805.09	7796.8	7796.8	7810.78
636.372	6327.25	6327.25	6327.25	6327.25	6327.25		631.331	6662.67	6678.89	6663.51	6665.22	6662.67	6682.29		627.804	7753.93	7759.79	7763.13	7753.93	7753.93	7768.99
636.272	6305.13	6305.13	6305.13	6305.13	6305.13		631.231	6596	6612.74	6596.86	6598.62	6596	6616.23		627.704	7765.93	7771.97	7776.17	7765.93	7765.93	7782.21
636.172	6342.13	6342.13	6342.13	6342.13	6342.13		631.131	6671.33	6688.6	6672.21	6674.02	6671.33	6692.16		627.604	7762.8	7769.02	7774.23	7762.8	7762.8	7780.45
636.072	6355.63	6355.63	6355.63	6355.63	6355.63		631.031	6807.33	6825.12	6808.22	6810.09	6807.33	6828.76		627.504	7754.53	7760.94	7767.34	7754.53	7754.53	7773.75
635.972	6374.5	6374.5	6374.5	6374.5	6374.5		630.931	6806	6824.3	6806.91	6808.82	6806	6828.03		627.404	7731.13	7737.75	7745.53	7731.13	7731.13	7752.14
635.872	6391.5	6391.5	6391.5	6391.5	6391.5		630.831	6824	6842.96	6824.92	6826.84	6824	6846.72		627.304	7751.53	7758.36	7767.79	7751.53	7751.53	7774.61
635.772	6409.5	6409.5	6409.5	6409.5	6409.5		630.731	6915	6934.66	6915.94	6917.9	6915	6938.51		627.204	7720.4	7727.44	7738.82	7720.4	7720.4	7745.86
635.672	6343	6343	6343	6343	6343		630.631	6995	7015.36	6995.96	6997.97	6995	7019.29		627.104	7719.2	7724.16	7737.86	7716.89	7716.89	7745.13
635.572	6342.25	6342.25	6342.25	6342.25	6342.25		630.531	6968.33	6989.4	6969.31	6971.38	6968.33	6993.42		627.004	7711.07	7724.77	7741.24	7717.26	7717.26	7748.75
635.472	6379	6379	6379	6379	6379		630.431	6974.33	6996.09	6975.33	6977.45	6974.33	7000.21		626.904	7760.33	7725.38	7745.18	7717.62	7717.62	7752.94
635.372	6374.75	6374.75	6374.75	6374.75	6374.75		630.331	7048	7070.46	7049.01	7051.2	7048	7074.67		626.804	7731.67	7726.01	7749.82	7717.99	7717.99	7757.85
635.272	6351.75	6351.75	6351.75	6351.75	6351.75		630.231	7094.33	7117.64	7095.37	7097.61	7094.33	7121.95		626.704	7770.2	7726.65	7755.36	7718.36	7718.36	7763.65
635.172	6366	6366	6366	6366	6366		630.131	6981	7005.28	6982.05	6984.36	6981	7009.69		626.604	7749.67	7727.31	7761.98	7718.73	7718.73	7770.56
635.072	6376.75	6376.75	6376.75	6376.75	6376.75		630.031	6942.67	6967.91	6943.74	6946.11	6942.67	6972.43		626.504	7764.2	7727.98	7769.98	7719.09	7719.09	7778.87
634.972	6371.88	6371.88	6371.88	6371.88	6371.88		629.931	6903	6929.22	6904.09	6906.53	6903	6933.84		626.404	7737.6	7728.66	7779.74	7719.46	7719.46	7788.94
634.872	6370	6370	6370	6370	6370		629.831	6829.67	6856.85	6830.78	6833.29	6829.67	6861.6		626.304	7762.93	7729.36	7791.74	7719.83	7719.83	7801.27
634.772	6389.25	6389.25	6389.25	6389.25	6389.25		629.731	6749.33	6777.49	6750.47	6753.06	6749.33	6782.35		626.204	7824.33	7730.08	7806.7	7720.2	7720.2	7816.59
634.672	6387.38	6387.38	6387.38	6387.38	6387.38		629.631	6614.67	6643.93	6615.83	6618.49	6614.67	6648.92		626.104	7811.93	7730.81	7825.49	7720.56	7720.56	7835.74
634.572	6353.5	6353.5	6353.5	6353.5	6353.5		629.531	6500	6530.66	6501.19	6503.93	6500	6535.77		626.004	7815.13	7731.56	7849.28	7720.93	7720.93	7859.91
634.472	6334.75	6334.75	6334.75	6334.75	6334.75		629.431	6453	6485.06	6454.21	6457.03	6453	6490.3		625.904	7836.2	7732.34	7879.62	7721.3	7721.3	7890.66
634.372	6358.63	6358.63	6358.63	6358.63	6358.63		629.331	6397.67	6431.12	6398.9	6401.81	6397.67	6436.5		625.804	7885.07	7733.13	7918.59	7721.67	7721.67	7930.06
634.272	6350.63	6350.63	6350.63	6350.63	6350.63		629.231	6442	6476.85	6443.26	6446.26	6442	6482.38		625.704	7958.33	7733.95	7969.09	7722.03	7722.03	7981.01
634.172	6365.88	6365.88	6365.88	6365.88	6365.88		629.131	6379.33	6415.58	6380.62	6383.72	6379.33	6421.26		625.604	8063.8	7734.8	8034.68	7722.4	7722.4	8047.07
634.072	6375.38	6375.38	6375.38	6375.38	6375.38		629.031	6372.67	6410.39	6373.98	6377.18	6372.67	6416.22		625.504	8164.07	7735.67	8119.34	7722.77	7722.77	8132.24
633.972	6390	6390	6390	6390	6390		628.931	6300.67	6340.5	6302.01	6305.31	6300.67	6346.49		625.404	8246.87	7736.56	8227.45	7723.13	7723.13	8240.88
633.872	6415	6415	6415	6415	6415		628.831	6321.33	6363.28	6322.71	6326.12	6321.33	6369.44		625.304	8398.4	7737.49	8362.68	7723.5	7723.5	8376.67
633.772	6440.5	6440.5	6440.5	6440.5	6440.5		628.731	6307.67	6351.73	6309.07	6312.6	6307.67	6358.06		625.204	8587.6	7738.46	8526.45	7723.87	7723.87	8541.04
633.672	6437.88	6437.88	6437.88	6437.88	6437.88		628.631	6307.33	6352.84	6308.77	6312.41	6307.33	6359.35		625.104	8748.87	7739.46	8715.54	7724.24	7724.24	8730.76
633.572	6392.88	6392.88	6392.88	6392.88	6392.88		628.531	6287	6334.83	6288.47	6292.24	6287	6341.54		625.004	8897	7740.49	8919.56	7724.6	7724.6	8935.45
633.472	6437.25	6437.25	6437.25	6437.25	6437.25		628.431	6228.33	6291.34	6242.5	6246.41	6241	6298.25		624.904	9145	7741.57	9123.6	7724.97	7724.97	9140.2
633.372	6440.75	6440.75	6440.75	6440.75	6440.75		628.331	6207.67	6292.35	6240.85	6244.89	6239.31	6299.47		624.804	9340.8	7742.69	9313.7	7725.34	7725.34	9331.05
633.272	6436.5	6436.5	6436.5	6436.5	6436.5		628.231	6231	6293.56	6239.18	6243.36	6237.6	6300.9		624.704	9488.53	7743.87	9478.8	7725.71	7725.71	9496.96
633.172	6430.38	6430.38	6430.38	6430.38	6430.38		628.131	6277.67	6295	6237.48	6241.82	6235.87	6302.56		624.604	9621	7745.09	9609.52	7726.07	7726.07	9628.54
633.072	6422.38	6422.38	6422.38	6422.38	6422.38		628.031	6223	6296.68	6235.76	6240.27	6234.12	6304.48		624.504	9724.2	7746.37	9700.78	7726.44	7726.44	9720.71
632.972	6394.5	6394.5	6394.5	6394.5	6394.5		627.931	6275	6298.64	6234.03	6238.71	6232.34	6306.69		624.404	9773.8	7747.71	9748.87	7726.81	7726.81	9769.77
632.872	6423	6423	6423	6423	6423		627.831	6330	6300.93	6232.28	6237.14	6230.55	6309.24		624.304	9756.67	7749.12	9751.19	7727.18	7727.18	9773.13
632.772	6421.5	6421.5	6421.5	6421.5	6421.5		627.731	6268.67	6303.57	6230.52	6235.56	6228.74	6312.17		624.204	9711.4	7750.61	9706.34	7727.54	7727.54	9729.4
632.672	6433.13	6433.13	6433.13	6433.13	6433.13		627.631	6206	6306.63	6228.74	6233.98	6226.92	6315.51		624.104	9642.6	7752.17	9614.47	7727.91	7727.91	9638.73
632.572	6468.25	6468.25	6468.25	6468.25	6468.25		627.531	6191.67	6310.14	6226.93	6232.39	6225.07	6319.33		624.004	9507.93	7753.82	9481.33	7728.28	7728.28	9506.87
632.472	6466	6466	6466	6466	6466		627.431	6228.67	6314.19	6225.11	6230.8	6223.2	6323.7		623.904	9353.27	7755.57	9318.14	7728.65	7728.65	9345.06
632.372	6506	6506	6506	6506	6506		627.331	6248	6318.85	6223.27	6229.2	6221.32	6328.7		623.804	9193.27	7757.42	9140.29	7729.01	7729.01	9168.69
632.272	6507.5	6507.5	6507.5	6507.5	6507.5		627.231	6266.33	6324.22	6221.42	6227.6	6219.41	6334.41		623.704	9009.07	7759.38	8961.75	7729.38	7729.38	8991.75
632.172	6527.38	6527.38	6527.38	6527.38	6527.38		627.131	6290.67	6330.39	6219.55	6226.01	6217.49	6340.97		623.604	8839.47	7761.48	8792.89	7729.75	7729.75	8824.62
632.072	6543.63	6543.63	6543.63	6543.63	6543.63		627.031	6321	6337.52	6217.68	6224.41	6215.55	6348.5		623.504	8669.6	7763.71	8640.68	7730.12	7730.12	8674.28
631.972	6565.25	6565.25	6565.25	6565.25	6565.25		626.931	6328	6345.75	6215.78	6222.82	6213.6	6357.16		623.404	8553	7766.1	8507.87	7730.49	7730.48	8543.49
631.872	6577.63	6577.63	6577.63	6577.63	6577.63		626.831	6393.67	6355.29	6213.88	6221.24	6211.63	6367.14		623.304	8423.2	7768.66	8394.59	7730.85	7730.85	8432.4
631.772	6598	6598	6598	6598	6598		626.731	6354.67	6366.37	6211.96	6219.67	6209.65	6378.7		623.204	8355.87	7771.41	8299.33	7731.23	7731.22	8339.53
631.672	6654.38	6654.38	6654.38	6654.38	6654.38		626.631	6361.67	6379.3	6210.02	6218.11	6207.66	6392.12		623.104	8262	7774.37	8219.85	7731.6	7731.59	8262.66
631.572	6762.38	6762.38	6762.38	6762.38	6762.38		626.531	6361	6394.46	6208.07	6216.57	6205.65	6407.8		623.004	8174.73	7777.58	8153.92	7731.99	7731.95	8199.58
631.472	6884.75	6884.75	6884.75	6884.75	6884.75		626.431	6430.67	6412.31	6206.12	6215.05	6203.62	6426.24		622.904	8096.53	7781.04	8098.95	7732.38	7732.32	8147.74
631.372	6953.5	6953.5	6953.5	6953.5	6953.5		626.331	6433.33	6433.5	6204.17	6213.55	6201.59	6448.04		622.804	8072.73	7784.81	8053	7732.8	7732.69	8105.23
631.272	7045	7045	7045	7045	7045		626.231	6465	6458.85	6202.21	6212.08	6199.54	6474.04		622.704	8069.53	7788.9	8014.44	7733.25	7733.05	8070.49
631.172	7076.38	7076.38	7076.38	7076.38	7076.38		626.131	6494.67	6489.44	6200.23	6210.63	6197.49	6505.33		622.604	8032.07	7793.38	7981.93	7733.77	7733.42	8042.23
631.072	7164.38	7164.38	7164.38	7164.38	7164.38		626.031	6540.33	6526.81	6198.25	6209.23	6195.42	6543.44		622.504	7983.2	7798.28	7954.47	7734.38	7733.79	8019.55
630.972	7260.88	7260.88	7260.88	7260.88	7260.88		625.931	6523	6572.97	6196.25	6207.87	6193.35	6590.39		622.404	7986.8	7803.68	7931.07	7735.13	7734.16	8001.57
630.872	7277.25	7277.25	7277.25	7277.25	7277.25		625.831	6654.33	6630.87	6194.25	6206.56	6191.27	6649.15		622.304	7984.67	7809.63	7911.03	7736.1	7734.52	7987.71
630.772	7361.88	7361.88	7361.88	7361.88	7361.88		625.731	6739.67	6704.42	6192.27	6205.31	6189.18	6723.63		622.204	7985.2	7816.21	7893.78	7737.39	7734.89	7977.59
630.672	7345.63	7345.63	7345.63	7345.63	7345.63		625.631	6858	6799.18	6190.29	6204.12	6187.09	6819.41		622.104	8010.47	7823.52	7878.86	7739.12	7735.26	7970.97
630.572	7373.75	7373.75	7373.75	7373.75	7373.75		625.531	6928.67	6922.75	6188.3	6203.02	6184.99	6944.08		622.004	7963.33	7831.66	7865.92	7741.45	7735.63	7967.77
630.472	7334.75	7334.75	7334.75	7334.75	7334.75		625.431	7091.33	7085.03	6186.32	6202	6182.9	7107.55		621.904	7959.67	7840.79	7854.64	7744.57	7735.99	7968
630.372	7305.25	7305.25	7305.25	7305.25	7305.25		625.331	7345.33	7299.23	6184.34	6201.09	6180.81	7323.04		621.804	7963.27	7851.05	7844.75	7748.7	7736.36	7971.77
630.272	7254.75	7254.75	7254.75	7254.75	7254.75		625.231	7688.67	7580.23	6182.37	6200.3	6178.72	7605.45		621.704	7964.2	7862.63	7836.06	7754.01	7736.73	7979.24
630.172	7120	7120	7120	7120	7120		625.131	8068	7945.68	6180.41	6199.65	6176.65	7972.44		621.604	7968.4	7875.77	7828.38	7760.67	7737.1	7990.62
630.072	7066.63	7066.63	7066.63	7066.63	7066.63		625.031	8566.67	8411.51	6178.49	6199.17	6174.59	8439.98		621.504	8025.13	7890.72	7821.59	7768.73	7737.46	8006.12
629.972	6982.25	6982.25	6982.25	6982.25	6982.25		624.931	9130.33	8990.41	6176.62	6198.89	6172.56	9020.8		621.404	8056.73	7907.84	7815.57	7778.12	7737.83	8025.88
629.872	6864.13	6864.13	6864.13	6864.13	6864.13		624.831	9839	9686.34	6174.78	6198.85	6170.56	9718.84		621.304	8070.47	7927.59	7810.21	7788.54	7738.2	8049.94
629.772	6772.25	6772.25	6772.25	6772.25	6772.25		624.731	10527	10489	6172.99	6199.07	6168.61	10523.8		621.204	8130.2	7950.46	7805.42	7799.43	7738.57	8078.19
629.672	6668.88	6668.88	6668.88	6668.88	6668.88		624.631	11398	11371.3	6171.25	6199.61	6166.71	11408.7		621.104	8108.4	7977.09	7801.14	7810.02	7738.93	8110.38
629.572	6606.63	6606.63	6606.63	6606.63	6606.63		624.531	12226.7	12285.2	6169.58	6200.53	6164.88	12325.6		621.004	8164.6	8008.26	7797.29	7819.35	7739.3	8146.3
629.472	6562.5	6562.5	6562.5	6562.5	6562.5		624.431	13144.7	13165.8	6167.99	6201.87	6163.13	13209.4		620.904	8192.53	8044.99	7793.84	7826.4	7739.67	8185.9
629.372	6521	6521	6521	6521	6521		624.331	13867.3	13937.5	6166.53	6203.71	6161.47	13984.8		620.804	8207.47	8088.52	7790.74	7830.36	7740.04	8229.54
629.272	6466.88	6466.88	6466.88	6466.88	6466.88		624.231	14500.3	14524.4	6165.22	6206.13	6159.91	14575.9		620.704	8282	8140.58	7787.93	7830.77	7740.4	8278.48
629.172	6455.5	6455.5	6455.5	6455.5	6455.5		624.131	14971.7	14863	6164.02	6209.2	6158.47	14919.3		620.604	8342.2	8203.15	7785.4	7827.62	7740.77	8334.64
629.072	6399.88	6399.88	6399.88	6399.88	6399.88		624.031	14960	14916.4	6162.94	6213	6157.15	14978		620.504	8402.53	8278.67	7783.12	7821.38	7741.14	8400.9
628.972	6392	6392	6392	6392	6392		623.931	14826	14675.9	6161.89	6217.64	6155.94	14743.5		620.404	8433.2	8370.24	7781.05	7812.83	7741.51	8481.11
628.872	6378.5	6378.5	6378.5	6378.5	6378.5		623.831	14345.7	14171.3	6161.06	6223.2	6154.86	14245.8		620.304	8564.93	8481.56	7779.17	7802.99	7741.87	8579.98
628.772	6395.88	6395.88	6395.88	6395.88	6395.88		623.731	13606.3	13455.9	6160.37	6229.78	6153.88	13538.3		620.204	8672.4	8616.88	7777.48	7792.83	7742.24	8702.71
628.672	6379.13	6379.13	6379.13	6379.13	6379.13		623.631	12764	12603.5	6159.8	6237.49	6153.01	12694.7		620.104	8859.87	8781.26	7775.93	7783.13	7742.61	8855.11
628.572	6368.75	6368.75	6368.75	6368.75	6368.75		623.531	11794.7	11690.8	6159.33	6246.41	6152.23	11792.1		620.004	9025.73	8978.5	7774.53	7774.44	7742.97	9041.52
628.472	6354.75	6354.75	6354.75	6354.75	6354.75		623.431	10852.7	10788	6158.97	6256.65	6151.53	10900.6		619.904	9270.93	9210.56	7773.26	7767.08	7743.34	9264.22
628.372	6339.88	6339.88	6339.88	6339.88	6339.88		623.331	9941.33	9949.13	6158.7	6268.29	6150.88	10074.3		619.804	9523.6	9475.67	7772.11	7761.13	7743.71	9521.49
628.272	6377.25	6377.25	6377.25	6377.25	6377.25		623.231	9199	9209.88	6158.5	6281.4	6150.29	9349.2		619.704	9811.53	9766.21	7771.07	7756.52	7744.08	9805.64
628.172	6361.13	6361.13	6361.13	6361.13	6361.13		623.131	8676.33	8585.29	6158.37	6296.05	6149.74	8740.24		619.604	10059.8	10067.7	7770.12	7753.1	7744.44	10102.1
628.072	6356.5	6356.5	6356.5	6356.5	6356.5		623.031	8178.67	8076.78	6158.31	6312.27	6149.22	8248.92		619.504	10369.4	10359.1	7769.26	7750.69	7744.81	10389.4
627.972	6359.88	6359.88	6359.88	6359.88	6359.88		622.931	7865.67	7673.93	6158.31	6330.06	6148.73	7864.85		619.404	10652.5	10612.5	7768.48	7749.08	7745.18	10639.7
627.872	6339.63	6339.63	6339.63	6339.63	6339.63		622.831	7564	7361.42	6158.37	6349.37	6148.25	7572.65		619.304	10868.5	10804.9	7767.78	7748.07	7745.55	10829.7
627.772	6364.88	6364.88	6364.88	6364.88	6364.88		622.731	7396.33	7122.27	6158.49	6370.1	6147.8	7355.27		619.204	10945.7	10923.1	7767.14	7747.51	7745.91	10945.9
627.672	6334.25	6334.25	6334.25	6334.25	6334.25		622.631	7246	6939.98	6158.68	6392.1	6147.36	7196.05		619.104	11029.7	10962.5	7766.57	7747.26	7746.28	10983.7
627.572	6330.63	6330.63	6330.63	6330.63	6330.63		622.531	7069.33	6801.15	6158.94	6415.14	6146.93	7081.37		619.004	10983.7	10924.1	7766.06	7747.24	7746.65	10944.1
627.472	6319.63	6319.63	6319.63	6319.63	6319.63		622.431	7015	6694.32	6159.27	6438.95	6146.51	6999.52		618.904	10831.4	10810	7765.59	7747.37	7747.02	10828.9
627.372	6352.5	6352.5	6352.5	6352.5	6352.5		622.331	6960.33	6611.28	6159.69	6463.17	6146.11	6941.92		618.804	10636.9	10626.5	7765.18	7747.59	7747.38	10644.5
627.272	6342.75	6342.75	6342.75	6342.75	6342.75		622.231	6939.33	6545.72	6160.19	6487.37	6145.71	6901.85		618.704	10373	10381.4	7764.82	7747.86	7747.75	10398.6
627.172	6298.88	6298.88	6298.88	6298.88	6298.88		622.131	6861	6493.17	6160.79	6511.08	6145.32	6874.4		618.604	10046.5	10086.9	7764.49	7748.18	7748.12	10103.3
627.072	6336	6336	6336	6336	6336		622.031	6892	6450.43	6161.51	6533.79	6144.94	6855.85		618.504	9723.47	9759.89	7764.2	7748.52	7748.49	9775.64
626.972	6364	6364	6364	6364	6364		621.931	6880.33	6415.11	6162.35	6554.96	6144.57	6843.29		618.404	9376.67	9422.3	7763.96	7748.87	7748.85	9437.42
626.872	6360.25	6360.25	6360.25	6360.25	6360.25		621.831	6858	6385.6	6163.34	6574.04	6144.2	6834.57		618.304	9150.2	9101.51	7763.74	7749.23	7749.22	9116.04
626.772	6319.63	6319.63	6319.63	6319.63	6319.63		621.731	6835	6360.59	6164.5	6590.49	6143.85	6827.89		618.204	8831.27	8818.75	7763.56	7749.59	7749.59	8832.72
626.672	6363.25	6363.25	6363.25	6363.25	6363.25		621.631	6822	6339.23	6165.85	6603.83	6143.5	6821.91		618.104	8619.87	8583.53	7763.4	7749.96	7749.96	8596.98
626.572	6398.5	6398.5	6398.5	6398.5	6398.5		621.531	6849	6320.79	6167.43	6613.62	6143.16	6815.52		618.004	8457.47	8395.94	7763.27	7750.32	7750.32	8408.89
626.472	6374.38	6374.38	6374.38	6374.38	6374.38		621.431	6784.33	6304.77	6169.27	6619.51	6142.83	6807.89		617.904	8304.07	8250.42	7763.17	7750.69	7750.69	8262.9
626.372	6351.38	6351.38	6351.38	6351.38	6351.38		621.331	6753	6290.74	6171.43	6621.25	6142.5	6798.41		617.804	8185.13	8139.3	7763.09	7751.06	7751.06	8151.34
626.272	6374.5	6374.5	6374.5	6374.5	6374.5		621.231	6684.33	6278.37	6173.97	6618.7	6142.19	6786.67		617.704	8100.8	8055.41	7763.03	7751.43	7751.43	8067.02
626.172	6346.5	6346.5	6346.5	6346.5	6346.5		621.131	6774	6267.42	6176.97	6611.86	6141.87	6772.51		617.604	8059	7991.78	7763	7751.79	7751.79	8002.99
626.072	6292.75	6292.75	6292.75	6292.75	6292.75		621.031	6701	6257.66	6180.53	6600.85	6141.57	6755.91		617.504	7989.07	7943.31	7762.98	7752.16	7752.16	7954.14
625.972	6311.13	6311.13	6311.13	6311.13	6311.13		620.931	6725.33	6248.94	6184.79	6585.88	6141.27	6737.06		617.404	7971.67	7906.19	7762.98	7752.53	7752.53	7916.65
625.872	6357	6357	6357	6357	6357		620.831	6729	6241.09	6189.94	6567.34	6140.98	6716.4		617.304	7951.4	7877.55	7763	7752.89	7752.89	7887.66
625.772	6351.25	6351.25	6351.25	6351.25	6351.25		620.731	6738.67	6234.01	6196.21	6545.66	6140.7	6694.48		617.204	7918.67	7855.29	7763.04	7753.26	7753.26	7865.06
625.672	6346.13	6346.13	6346.13	6346.13	6346.13		620.631	6681.67	6227.6	6203.93	6521.4	6140.43	6672.08		617.104	7854.73	7837.91	7763.09	7753.63	7753.63	7847.37
625.572	6338.63	6338.63	6338.63	6338.63	6338.63		620.531	6705.33	6221.77	6213.53	6495.12	6140.16	6650.11		617.004	7851.13	7824.18	7763.16	7754	7754	7833.33
625.472	6351.25	6351.25	6351.25	6351.25	6351.25		620.431	6656.33	6216.45	6225.56	6467.44	6139.89	6629.67		616.904	7853.73	7813.24	7763.23	7754.36	7754.36	7822.11
625.372	6340.88	6340.88	6340.88	6340.88	6340.88		620.331	6609.33	6211.59	6240.77	6438.97	6139.64	6612.06		616.804	7834.67	7804.47	7763.32	7754.73	7754.73	7813.06
625.272	6323.25	6323.25	6323.25	6323.25	6323.25		620.231	6596	6207.14	6260.08	6410.29	6139.39	6598.73		616.704	7830.07	7797.39	7763.43	7755.1	7755.1	7805.72
625.172	6339.13	6339.13	6339.13	6339.13	6339.13		620.131	6574	6203.04	6284.58	6381.95	6139.14	6591.28		616.604	7791.07	7791.65	7763.54	7755.47	7755.47	7799.73
625.072	6378.13	6378.13	6378.13	6378.13	6378.13		620.031	6603.67	6199.25	6315.63	6354.42	6138.9	6591.5		616.504	7786.47	7786.99	7763.67	7755.83	7755.83	7794.82
624.972	6365.5	6365.5	6365.5	6365.5	6365.5		619.931	6609	6195.76	6354.53	6328.14	6138.67	6601.08		616.404	7781.6	7783.17	7763.8	7756.2	7756.2	7790.77
624.872	6397.75	6397.75	6397.75	6397.75	6397.75		619.831	6640	6192.53	6402.59	6303.41	6138.44	6621.64		616.304	7791.8	7780.03	7763.95	7756.57	7756.57	7787.41
624.772	6372.25	6372.25	6372.25	6372.25	6372.25		619.731	6654.67	6189.52	6460.87	6280.5	6138.22	6654.45		616.204	7803.87	7777.44	7764.1	7756.94	7756.94	7784.6
624.672	6389.63	6389.63	6389.63	6389.63	6389.63		619.631	6682	6186.73	6529.65	6259.56	6138.01	6699.92		616.104	7777.4	7775.3	7764.27	7757.3	7757.3	7782.26
624.572	6383.5	6383.5	6383.5	6383.5	6383.5		619.531	6713.33	6184.14	6608.43	6240.7	6137.8	6757.65		616.004	7783.47	7773.54	7764.44	7757.67	7757.67	7780.3
624.472	6388	6388	6388	6388	6388		619.431	6824.67	6181.71	6695.29	6223.91	6137.6	6825.71		615.904	7768.4	7772.08	7764.62	7758.04	7758.04	7778.66
624.372	6384.25	6384.25	6384.25	6384.25	6384.25		619.331	6943.33	6180.13	6786.89	6209.16	6137.41	6901.36		615.804	7785	7770.88	7764.8	7758.41	7758.41	7777.28
624.272	6382.63	6382.63	6382.63	6382.63	6382.63		619.231	7005	6177.84	6878.36	6196.36	6137.23	6978.09		615.704	7753.4	7769.9	7764.99	7758.77	7758.77	7776.12
624.172	6390.5	6390.5	6390.5	6390.5	6390.5		619.131	7031	6175.56	6963.62	6185.37	6137.07	7050.42		615.604	7735.13	7769.09	7765.19	7759.14	7759.14	7775.15
624.072	6404.13	6404.13	6404.13	6404.13	6404.13		619.031	7061	6173.67	7035.9	6176.05	6136.91	7111.79		615.504	7767	7768.44	7765.4	7759.51	7759.51	7774.33
623.972	6404	6404	6404.01	6404	6404.01		618.931	7195.33	6172.13	7088.56	6168.23	6136.77	7155.39		615.404	7726.4	7767.91	7765.61	7759.88	7759.88	7773.65
623.872	6425.63	6425.63	6425.65	6425.63	6425.65		618.831	7212.67	6170.61	7116.31	6161.74	6136.64	7175.37		615.304	7762.33	7767.5	7765.83	7760.24	7760.24	7773.08
623.772	6420.75	6420.75	6420.79	6420.75	6420.79		618.731	7136.33	6169.1	7115.37	6156.41	6136.53	7167.81		615.204	7771.4	7767.17	7766.05	7760.61	7760.61	7772.62
623.672	6358.25	6358.25	6358.31	6358.25	6358.31		618.631	7134.67	6167.61	7085.16	6152.07	6136.43	7131.97		615.104	7728.07	7766.93	7766.28	7760.98	7760.98	7772.24
623.572	6380.88	6380.88	6380.98	6380.88	6380.98		618.531	7025.67	6166.13	7027.65	6148.58	6136.35	7069.66		615.004	7783.47	7788.88	7788.64	7783.47	7783.47	7794.05
623.472	6388.5	6378.21	6378.38	6378.21	6378.38		618.431	6994.67	6164.79	6947.36	6145.79	6136.28	6985.38		614.904	7753.27	7758.2	7758.31	7753.27	7753.27	7763.24
623.372	6359.88	6379.24	6379.51	6379.24	6379.51		618.331	6909.67	6163.76	6851.01	6143.59	6136.22	6885.91		614.804	7722.47	7726.97	7727.38	7722.47	7722.47	7731.89
623.272	6378.63	6380.26	6380.68	6380.26	6380.68		618.231	6758	6162.74	6745.99	6141.85	6136.17	6778.24		614.704	7714.47	7718.59	7719.26	7714.47	7714.47	7723.39
623.172	6360.63	6381.28	6381.93	6381.28	6381.93		618.131	6696	6161.73	6639.79	6140.5	6136.13	6669.77		614.604	7709.87	7713.65	7714.55	7709.87	7709.87	7718.33
623.072	6380.25	6382.3	6383.28	6382.3	6383.28		618.031	6621.33	6160.73	6538.81	6139.46	6136.1	6566.8		614.504	7733.73	7737.21	7738.3	7733.73	7733.73	7741.78
622.972	6383.5	6383.32	6384.78	6383.32	6384.78		617.931	6435.33	6159.74	6447.95	6138.66	6136.08	6474.19		614.404	7783.27	7786.47	7787.73	7783.27	7783.27	7790.93
622.872	6394	6384.35	6386.5	6384.34	6386.5		617.831	6419	6158.77	6370.03	6138.04	6136.05	6394.73		614.304	7753.27	7756.22	7757.62	7753.27	7753.27	7760.57
622.772	6383.5	6385.37	6388.48	6385.36	6388.48		617.731	6293.33	6158.05	6306.23	6137.57	6136.04	6329.78		614.204	7731.6	7734.33	7735.85	7731.6	7731.6	7738.58
622.672	6401	6386.39	6390.83	6386.39	6390.84		617.631	6244.67	6157.34	6256.2	6137.2	6136.02	6278.7		614.104	7751.93	7754.46	7756.09	7751.93	7751.93	7758.61
622.572	6410.5	6387.42	6393.65	6387.41	6393.66		617.531	6183	6156.63	6218.43	6136.93	6136.01	6239.97		614.004	7742.8	7745.14	7746.86	7742.8	7742.8	7749.2
622.472	6431.38	6388.46	6397.05	6388.43	6397.07		617.431	6289.33	6155.92	6191.08	6136.71	6136	6211.72		613.904	7733.53	7735.71	7737.5	7733.53	7733.53	7739.67
622.372	6425.75	6389.5	6401.19	6389.45	6401.24		617.331	6149.67	6155.21	6171.9	6136.55	6135.99	6191.69		613.804	7743.87	7745.89	7747.75	7743.87	7743.87	7749.76
622.272	6446.5	6390.56	6406.17	6390.47	6406.25		617.231	6173.33	6154.5	6158.9	6136.42	6135.98	6177.87		613.704	7744.73	7746.61	7748.6	7744.73	7744.73	7750.47
622.172	6421.13	6391.65	6412.17	6391.49	6412.32		617.131	6217.67	6153.94	6150.37	6136.33	6135.97	6168.7		613.604	7756.8	7758.55	7760.57	7756.8	7756.8	7762.33
622.072	6392.13	6392.78	6419.27	6392.51	6419.53		617.031	6173.67	6153.41	6144.89	6136.25	6135.96	6162.63		613.504	7749.67	7751.3	7753.35	7749.67	7749.67	7754.99
621.972	6418.75	6393.98	6427.55	6393.54	6427.99		616.931	6170.33	6152.89	6141.47	6136.19	6135.95	6158.64		613.404	7732.27	7733.79	7735.87	7732.27	7732.27	7737.39
621.872	6455.5	6395.3	6437.02	6394.56	6437.76		616.831	6139.67	6152.36	6139.36	6136.14	6135.94	6155.97		613.304	7764	7765.43	7767.51	7764	7764	7768.94
621.772	6454.88	6396.79	6447.56	6395.58	6448.77		616.731	6216.67	6151.83	6138.07	6136.1	6135.94	6154.13		613.204	7760.27	7761.6	7763.69	7760.27	7760.27	7765.03
621.672	6477.63	6398.55	6459.02	6396.6	6460.97		616.631	6164.67	6151.3	6137.29	6136.07	6135.93	6152.8		613.104	7753.93	7755.19	7757.27	7753.93	7753.93	7758.53
621.572	6448.38	6400.72	6470.98	6397.62	6474.08		616.531	6169.67	6150.86	6136.81	6136.04	6135.92	6151.86		613.004	7767.33	7768.51	7770.6	7767.33	7767.33	7771.77
621.472	6479.25	6403.49	6482.99	6398.64	6487.84		616.431	6184.33	6150.45	6136.52	6136.02	6135.92	6151.15		612.904	7797.6	7798.71	7800.81	7797.6	7797.6	7801.91
621.372	6480.63	6407.15	6494.43	6399.66	6501.91		616.331	6173	6150.05	6136.33	6136	6135.91	6150.56		612.804	7784.67	7785.71	7787.82	7784.67	7784.67	7788.86
621.272	6525.75	6412.03	6504.66	6400.69	6516		616.231	6201.33	6149.65	6136.21	6135.99	6135.91	6150.04		612.704	7796.6	7797.58	7799.69	7796.6	7796.6	7800.67
621.172	6568.25	6418.72	6512.92	6401.71	6529.93		616.131	6137	6149.25	6136.14	6135.97	6135.91	6149.55		612.604	7781.13	7782.06	7784.17	7781.13	7781.13	7785.09
621.072	6520.38	6427.77	6518.74	6402.73	6543.78		616.031	6171.33	6148.85	6136.08	6135.96	6135.9	6149.09		612.504	7802.87	7803.74	7805.85	7802.87	7802.87	7806.72
620.972	6516.5	6440.13	6521.61	6403.75	6557.99		615.931	6140.33	6148.49	6136.04	6135.95	6135.9	6148.68		612.404	7807.4	7808.22	7810.32	7807.4	7807.4	7811.14
620.872	6594.88	6456.78	6521.43	6404.77	6573.45		615.831	6164	6148.18	6136.01	6135.94	6135.9	6148.33		612.304	7758.27	7759.04	7761.13	7758.27	7758.27	7761.91
620.772	6598.5	6478.94	6518.31	6405.79	6591.46		615.731	6182.67	6147.86	6135.98	6135.94	6135.89	6147.99		612.204	7787.2	7787.93	7790.01	7787.2	7787.2	7790.74
620.672	6608.5	6508.31	6512.54	6406.81	6614.03		615.631	6184	6147.55	6135.97	6135.93	6135.89	6147.66		612.104	7811.07	7811.76	7813.82	7811.07	7811.07	7814.51
620.572	6657.25	6546.13	6504.76	6407.84	6643.06		615.531	6157.67	6147.24	6135.95	6135.93	6135.89	6147.34		612.004	7818.2	7818.86	7820.9	7818.2	7818.2	7821.55
620.472	6668.88	6594.64	6495.56	6408.86	6681.34		615.431	6098	6146.93	6135.94	6135.92	6135.89	6147.01		611.904	7820.8	7821.42	7823.44	7820.8	7820.8	7824.06
620.372	6731.5	6655.09	6485.66	6409.88	6730.87		615.331	6150.33	6146.63	6135.93	6135.92	6135.89	6146.7		611.804	7785	7785.59	7787.58	7785	7785	7788.17
620.272	6830.38	6729.09	6475.68	6410.9	6793.87		615.231	6084.67	6146.39	6135.92	6135.91	6135.89	6146.45		611.704	7805.07	7805.63	7807.59	7805.07	7805.07	7808.15
620.172	6868.13	6817.81	6466.14	6411.92	6872.04		615.131	6130.33	6146.14	6135.92	6135.91	6135.89	6146.19		611.604	7842.4	7842.93	7844.87	7842.4	7842.4	7845.4
620.072	6954.5	6920.91	6457.39	6412.94	6965.36		615.031	6173	6145.9	6135.91	6135.91	6135.89	6145.94		611.504	7822.8	7823.31	7825.23	7822.8	7822.8	7825.74
619.972	7085.5	7038.3	6449.74	6413.96	7074.08		614.931	6134.67	6145.65	6135.91	6135.91	6135.89	6145.69
619.872	7183.38	7166.82	6443.23	6414.99	7195.06		614.831	6126	6145.41	6135.91	6135.91	6135.89	6145.44
619.772	7280.63	7302.85	6437.92	6416.01	7324.76		614.731	6101.67	6145.16	6135.91	6135.9	6135.89	6145.19
619.672	7478.38	7440.44	6433.73	6417.03	7457.15		614.631	6180	6189.07	6180.01	6180.01	6180	6189.1
619.572	7597	7572.56	6430.57	6418.05	7585.08		614.531	6166.67	6175.54	6166.68	6166.68	6166.67	6175.57
619.472	7706.75	7690.32	6428.31	6419.07	7699.56		614.431	6174	6182.68	6174.01	6174.01	6174	6182.7
619.372	7814.5	7786.22	6426.79	6420.09	7792.93		614.331	6130.67	6139.14	6130.68	6130.68	6130.67	6139.16
619.272	7827.13	7851.71	6425.91	6421.11	7856.51		614.231	6167.67	6175.95	6167.68	6167.68	6167.67	6175.97
619.172	7867.75	7882.07	6425.51	6422.14	7885.44		614.131	6082.67	6090.75	6082.67	6082.68	6082.67	6090.77
619.072	7854.13	7874.75	6425.49	6423.16	7877.09		614.031	6139	6146.91	6139.01	6139.01	6139	6146.93
618.972	7855.75	7829.6	6425.77	6424.18	7831.2		613.931	6119	6126.75	6119.01	6119.01	6119	6126.76
618.872	7777.25	7752.04	6426.27	6425.2	7753.11		613.831	6079.33	6086.92	6079.34	6079.34	6079.33	6086.93
618.772	7675.63	7647.01	6426.93	6426.22	7647.72		613.731	6150.67	6158.09	6150.67	6150.67	6150.67	6158.1
618.672	7528.25	7523.79	6427.71	6427.24	7524.25		613.631	6169.67	6176.93	6169.67	6169.67	6169.67	6176.94
618.572	7392.88	7390.32	6428.56	6428.26	7390.61		613.531	6140.67	6147.77	6140.67	6140.67	6140.67	6147.78
618.472	7237.38	7254.67	6429.47	6429.29	7254.86		613.431	6175.33	6182.29	6175.34	6175.34	6175.33	6182.3
618.372	7107.38	7123.3	6430.42	6430.31	7123.42		613.331	6205.33	6212.15	6205.34	6205.34	6205.33	6212.16
618.272	6963.5	7001.69	6431.4	6431.33	7001.77		613.231	6255.33	6262.02	6255.34	6255.34	6255.33	6262.03
618.172	6867.75	6892.5	6432.39	6432.35	6892.54		613.131	6145.67	6152.22	6145.67	6145.67	6145.67	6152.23
618.072	6823.25	6797.86	6433.4	6433.37	6797.89		613.031	6187.33	6193.75	6187.34	6187.34	6187.33	6193.76
617.972	6729	6717.97	6434.41	6434.39	6717.99		612.931	6109.67	6115.95	6109.67	6109.67	6109.67	6115.96
617.872	6629.13	6652.09	6435.42	6435.41	6652.1		612.831	6191.33	6197.49	6191.34	6191.34	6191.33	6197.5
617.772	6621.13	6599.47	6436.44	6436.44	6599.48		612.731	6215.33	6221.38	6215.34	6215.34	6215.33	6221.38
617.672	6567	6557.93	6437.46	6437.46	6557.93		612.631	6189.33	6195.27	6189.34	6189.34	6189.33	6195.27
617.572	6533.88	6526.23	6438.48	6438.48	6526.24		612.531	6243.67	6249.49	6243.67	6243.67	6243.67	6249.49
617.472	6469.38	6502.36	6439.5	6439.5	6502.36		612.431	6185.67	6191.38	6185.67	6185.67	6185.67	6191.38
617.372	6511.13	6484.84	6440.52	6440.52	6484.84		612.331	6130.33	6135.93	6130.33	6130.34	6130.33	6135.94
617.272	6563.75	6472.36	6441.54	6441.54	6472.36		612.231	6217.33	6222.82	6217.33	6217.34	6217.33	6222.82
617.172	6497.38	6463.6	6442.56	6442.56	6463.6		612.131	6207.33	6212.73	6207.33	6207.34	6207.33	6212.73
617.072	6471.13	6457.8	6443.59	6443.59	6457.8		612.031	6163.33	6168.63	6163.33	6163.34	6163.33	6168.63
616.972	6479.75	6454.03	6444.61	6444.61	6454.03		611.931	6226.33	6231.54	6226.33	6226.34	6226.33	6231.54
616.872	6450.88	6451.79	6445.63	6445.63	6451.79		611.831	6231	6236.11	6231	6231	6231	6236.11
616.772	6436.75	6450.62	6446.65	6446.65	6450.62		611.731	6220	6225.01	6220	6220	6220	6225.02
616.672	6464.38	6450.19	6447.67	6447.67	6450.19		611.631	6248.67	6253.59	6248.67	6248.67	6248.67	6253.59
616.572	6434.25	6450.27	6448.69	6448.69	6450.27		611.531	6204.33	6209.17	6204.33	6204.34	6204.33	6209.17
616.472	6446.88	6450.68	6449.71	6449.71	6450.68		611.431	6181	6185.76	6181	6181	6181	6185.76
616.372	6463.5	6451.32	6450.74	6450.74	6451.32		611.331	6204.33	6209.01	6204.33	6204.33	6204.33	6209.01
616.272	6472.5	6452.11	6451.76	6451.76	6452.11		611.231	6200.33	6204.93	6200.33	6200.33	6200.33	6204.93
616.172	6449.13	6452.99	6452.78	6452.78	6452.99		611.131	6177.67	6182.18	6177.67	6177.67	6177.67	6182.18
616.072	6454.13	6453.92	6453.8	6453.8	6453.92		611.031	6168	6172.44	6168	6168	6168	6172.44
615.972	6416.88	6454.89	6454.82	6454.82	6454.89		610.931	6151.33	6155.7	6151.33	6151.33	6151.33	6155.7
615.872	6466.38	6455.88	6455.84	6455.84	6455.88		610.831	6191.67	6195.96	6191.67	6191.67	6191.67	6195.96
615.772	6450	6456.89	6456.86	6456.86	6456.89		610.731	6294	6298.22	6294	6294	6294	6298.23
615.672	6455.75	6457.9	6457.89	6457.89	6457.9		610.631	6173	6177.16	6173	6173	6173	6177.16
615.572	6517.63	6458.91	6458.91	6458.91	6458.91		610.531	6130.33	6134.42	6130.33	6130.33	6130.33	6134.42
615.472	6461.75	6459.93	6459.93	6459.93	6459.93		610.431	6233.33	6237.35	6233.33	6233.33	6233.33	6237.35
615.372	6435.25	6435.25	6435.25	6435.25	6435.25		610.331	6239.67	6243.62	6239.67	6239.67	6239.67	6243.62
615.272	6450	6450	6450	6450	6450		610.231	6181.67	6185.56	6181.67	6181.67	6181.67	6185.56
615.172	6449.13	6449.13	6449.13	6449.13	6449.13		610.131	6121	6124.83	6121	6121	6121	6124.83
615.072	6442.63	6442.63	6442.63	6442.63	6442.63		610.031	6220	6223.77	6220	6220	6220	6223.77
614.972	6441.13	6441.13	6441.13	6441.13	6441.13		609.931	6214	6217.71	6214	6214	6214	6217.71
614.872	6444.88	6444.88	6444.88	6444.88	6444.88		609.831	6201	6204.65	6201	6201	6201	6204.65
614.772	6434.5	6434.5	6434.5	6434.5	6434.5		609.731	6162	6165.6	6162	6162	6162	6165.6
614.672	6424.25	6424.25	6424.25	6424.25	6424.25		609.631	6142.33	6145.88	6142.33	6142.33	6142.33	6145.88
614.572	6447.13	6447.13	6447.13	6447.13	6447.13		609.531	6187.33	6190.82	6187.33	6187.33	6187.33	6190.83
614.472	6495.5	6495.5	6495.5	6495.5	6495.5		609.431	6202.67	6206.11	6202.67	6202.67	6202.67	6206.11
614.372	6485.25	6485.25	6485.25	6485.25	6485.25		609.331	6231.67	6235.05	6231.67	6231.67	6231.67	6235.06
614.272	6459.75	6459.75	6459.75	6459.75	6459.75		609.231	6189	6192.34	6189	6189	6189	6192.34
614.172	6480.63	6480.63	6480.63	6480.63	6480.63		609.131	6177.33	6180.62	6177.33	6177.33	6177.33	6180.62
614.072	6483.5	6483.5	6483.5	6483.5	6483.5		609.031	6171	6174.24	6171	6171	6171	6174.24
613.972	6488.88	6488.88	6488.88	6488.88	6488.88		608.931	6154.67	6157.86	6154.67	6154.67	6154.67	6157.86
613.872	6480.38	6480.38	6480.38	6480.38	6480.38		608.831	6192.67	6195.81	6192.67	6192.67	6192.67	6195.81
613.772	6434.75	6434.75	6434.75	6434.75	6434.75		608.731	6211.67	6214.77	6211.67	6211.67	6211.67	6214.77
613.672	6451.63	6451.63	6451.63	6451.63	6451.63		608.631	6180.33	6183.39	6180.33	6180.33	6180.33	6183.39
613.572	6471.13	6471.13	6471.13	6471.13	6471.13		608.531	6150	6153.01	6150	6150	6150	6153.01
613.472	6477.63	6477.63	6477.63	6477.63	6477.63		608.431	6122	6124.97	6122	6122	6122	6124.97
613.372	6492.38	6492.38	6492.38	6492.38	6492.38		608.331	6171.67	6174.6	6171.67	6171.67	6171.67	6174.6
613.272	6505.13	6505.13	6505.13	6505.13	6505.13		608.231	6148.33	6151.22	6148.33	6148.33	6148.33	6151.22
613.172	6452.25	6452.25	6452.25	6452.25	6452.25		608.131	6169	6171.85	6169	6169	6169	6171.85
613.072	6490.75	6490.75	6490.75	6490.75	6490.75		608.031	6146.67	6149.48	6146.67	6146.67	6146.67	6149.48
612.972	6471.5	6471.5	6471.5	6471.5	6471.5		607.931	6245.67	6248.44	6245.67	6245.67	6245.67	6248.44
612.872	6508.63	6508.63	6508.63	6508.63	6508.63		607.831	6247	6249.73	6247	6247	6247	6249.73
612.772	6473	6473	6473	6473	6473		607.731	6167	6169.7	6167	6167	6167	6169.7
612.672	6500.38	6500.38	6500.38	6500.38	6500.38		607.631	6218	6220.66	6218	6218	6218	6220.66
612.572	6495.88	6495.88	6495.88	6495.88	6495.88		607.531	6210	6212.63	6210	6210	6210	6212.63
612.472	6455.13	6455.13	6455.13	6455.13	6455.13		607.431	6264.67	6267.26	6264.67	6264.67	6264.67	6267.26
612.372	6453.25	6453.25	6453.25	6453.25	6453.25		607.331	6241	6243.56	6241	6241	6241	6243.56
612.272	6480.13	6480.13	6480.13	6480.13	6480.13		607.231	6231.33	6233.86	6231.33	6231.33	6231.33	6233.86
612.172	6460.63	6460.63	6460.63	6460.63	6460.63		607.131	6228.33	6230.82	6228.33	6228.33	6228.33	6230.82
612.072	6444.75	6444.75	6444.75	6444.75	6444.75		607.031	6303.67	6306.13	6303.67	6303.67	6303.67	6306.13
611.972	6516.5	6516.5	6516.5	6516.5	6516.5
611.872	6503.88	6503.88	6503.88	6503.88	6503.88
611.772	6501.75	6501.75	6501.75	6501.75	6501.75
611.672	6508.88	6508.88	6508.88	6508.88	6508.88
611.572	6494	6494	6494	6494	6494
611.472	6521.25	6521.25	6521.25	6521.25	6521.25
611.372	6518.5	6518.5	6518.5	6518.5	6518.5
611.272	6524.13	6524.13	6524.13	6524.13	6524.13
611.172	6570.38	6570.38	6570.38	6570.38	6570.38
611.072	6549.5	6549.5	6549.5	6549.5	6549.5
610.972	6503.38	6503.38	6503.38	6503.38	6503.38
610.872	6523.75	6523.75	6523.75	6523.75	6523.75
610.772	6495.88	6495.88	6495.88	6495.88	6495.88
610.672	6508.13	6508.13	6508.13	6508.13	6508.13
610.572	6471.25	6471.25	6471.25	6471.25	6471.25
610.472	6473.25	6473.25	6473.25	6473.25	6473.25
610.372	6519.13	6519.13	6519.13	6519.13	6519.13
610.272	6532.63	6532.63	6532.63	6532.63	6532.63
610.172	6531.13	6531.13	6531.13	6531.13	6531.13
610.072	6498.63	6498.63	6498.63	6498.63	6498.63
609.972	6514.88	6514.88	6514.88	6514.88	6514.88
609.872	6539.13	6539.13	6539.13	6539.13	6539.13
609.772	6540.13	6540.13	6540.13	6540.13	6540.13
609.672	6515.25	6515.25	6515.25	6515.25	6515.25
609.572	6565	6565	6565	6565	6565
609.472	6559.38	6559.38	6559.38	6559.38	6559.38
609.372	6559.13	6559.13	6559.13	6559.13	6559.13
609.272	6591.75	6591.75	6591.75	6591.75	6591.75
609.172	6540.5	6540.5	6540.5	6540.5	6540.5
609.072	6543.38	6543.38	6543.38	6543.38	6543.38
608.972	6553.5	6553.5	6553.5	6553.5	6553.5
608.872	6518.38	6518.38	6518.38	6518.38	6518.38
608.772	6546.38	6546.38	6546.38	6546.38	6546.38
608.672	6555.63	6555.63	6555.63	6555.63	6555.63
608.572	6546	6546	6546	6546	6546
608.472	6507.75	6507.75	6507.75	6507.75	6507.75
608.372	6539.63	6539.63	6539.63	6539.63	6539.63
608.272	6533	6533	6533	6533	6533
608.172	6546.38	6546.38	6546.38	6546.38	6546.38
608.072	6552.13	6552.13	6552.13	6552.13	6552.13
607.972	6581.5	6581.5	6581.5	6581.5	6581.5
607.872	6531.88	6531.88	6531.88	6531.88	6531.88
607.772	6563.25	6563.25	6563.25	6563.25	6563.25
607.672	6543.5	6543.5	6543.5	6543.5	6543.5
607.572	6552.38	6552.38	6552.38	6552.38	6552.38
607.472	6560	6560	6560	6560	6560
607.372	6536	6536	6536	6536	6536
607.272	6562.38	6562.38	6562.38	6562.38	6562.38
607.172	6539	6539	6539	6539	6539
607.072	6553.63	6553.63	6553.63	6553.63	6553.63
606.972	6540.63	6540.63	6540.63	6540.63	6540.63
606.872	6540.5	6540.5	6540.5	6540.5	6540.5
606.772	6575.88	6575.88	6575.88	6575.88	6575.88
606.672	6640	6640	6640	6640	6640
606.572	6555.63	6555.63	6555.63	6555.63	6555.63
606.472	6564.38	6564.38	6564.38	6564.38	6564.38
606.372	6585.75	6585.75	6585.75	6585.75	6585.75
606.272	6574.25	6574.25	6574.25	6574.25	6574.25
606.172	6578.75	6578.75	6578.75	6578.75	6578.75
606.072	6569.88	6569.88	6569.88	6569.88	6569.88
605.972	6560.25	6560.25	6560.25	6560.25	6560.25
605.872	6558.13	6558.13	6558.13	6558.13	6558.13
605.772	6574	6574	6574	6574	6574
605.672	6536.63	6536.63	6536.63	6536.63	6536.63
605.572	6567	6567	6567	6567	6567
605.472	6596.63	6596.63	6596.63	6596.63	6596.63
605.372	6583.13	6583.13	6583.13	6583.13	6583.13
605.272	6578.38	6578.38	6578.38	6578.38	6578.38
605.172	6582.13	6582.13	6582.13	6582.13	6582.13
605.072	6589.25	6589.25	6589.25	6589.25	6589.25
604.972	6587.5	6587.5	6587.5	6587.5	6587.5
604.872	6572.88	6572.88	6572.88	6572.88	6572.88
604.772	6581.38	6581.38	6581.38	6581.38	6581.38
604.672	6582.25	6582.25	6582.25	6582.25	6582.25
604.572	6611.13	6611.13	6611.13	6611.13	6611.13
604.472	6638.63	6638.63	6638.63	6638.63	6638.63
604.372	6627.13	6627.13	6627.13	6627.13	6627.13
604.272	6616.25	6616.25	6616.25	6616.25	6616.25
604.172	6558.13	6558.13	6558.13	6558.13	6558.13
604.072	6667.75	6667.75	6667.75	6667.75	6667.75
603.972	6591.63	6591.63	6591.63	6591.63	6591.63
603.872	6561.13	6561.13	6561.13	6561.13	6561.13
603.772	6575.63	6575.63	6575.63	6575.63	6575.63
603.672	6579.88	6579.88	6579.88	6579.88	6579.88
603.572	6544.88	6544.88	6544.88	6544.88	6544.88
603.472	6618.13	6618.13	6618.13	6618.13	6618.13
603.372	6624.75	6624.75	6624.75	6624.75	6624.75
603.272	6598.25	6598.25	6598.25	6598.25	6598.25
603.172	6637.13	6637.13	6637.13	6637.13	6637.13
603.072	6659.5	6659.5	6659.5	6659.5	6659.5
602.972	6634.25	6634.25	6634.25	6634.25	6634.25
602.872	6596.5	6596.5	6596.5	6596.5	6596.5
602.772	6570.25	6570.25	6570.25	6570.25	6570.25
602.672	6593.5	6593.5	6593.5	6593.5	6593.5
602.572	6623	6623	6623	6623	6623
602.472	6593.88	6593.88	6593.88	6593.88	6593.88
602.372	6666.25	6666.25	6666.25	6666.25	6666.25
602.272	6612.5	6612.5	6612.5	6612.5	6612.5
602.172	6625.38	6625.38	6625.38	6625.38	6625.38
602.072	6620.75	6620.75	6620.75	6620.75	6620.75

## Sheet: C30 XPS spectra
C30-1							C30-2
BE (eV)	Spectra	I-	I0	background	simulation		BE (eV)	Spectra	I5+	I-	background	simulation
645.21	4730.51	4730.51	4730.51	4730.51	4730.51		642.023	9684	9684.49	9684.74	9684	9685.23
645.11	4733.93	4733.93	4733.93	4733.93	4733.93		641.923	9645	9645.5	9645.75	9645	9646.25
645.01	4750.48	4750.48	4750.48	4750.48	4750.48		641.823	9459	9459.51	9459.75	9459	9460.27
644.91	4747.68	4747.68	4747.68	4747.68	4747.68		641.723	9610	9610.52	9610.76	9610	9611.28
644.81	4743.31	4743.31	4743.31	4743.31	4743.31		641.623	9563	9563.53	9563.77	9563	9564.3
644.71	4738.03	4738.03	4738.03	4738.03	4738.03		641.523	9541	9541.54	9541.78	9541	9542.32
644.61	4733.45	4733.45	4733.45	4733.45	4733.45		641.423	9607	9607.55	9607.79	9607	9608.34
644.51	4744.41	4744.41	4744.41	4744.41	4744.41		641.323	9682	9682.56	9682.8	9682	9683.36
644.41	4746.39	4746.39	4746.39	4746.39	4746.39		641.223	9648	9648.57	9648.81	9648	9649.38
644.31	4740.6	4740.6	4740.6	4740.6	4740.6		641.123	9674	9674.58	9674.81	9674	9675.4
644.21	4743.85	4743.85	4743.85	4743.85	4743.85		641.023	9625	9625.59	9625.82	9625	9626.42
644.11	4749.2	4749.2	4749.2	4749.2	4749.2		640.923	9508	9508.6	9508.83	9508	9509.44
644.01	4745.39	4745.39	4745.39	4745.39	4745.39		640.823	9750	9750.61	9750.84	9750	9751.45
643.91	4737.97	4737.97	4737.97	4737.97	4737.97		640.723	9579	9579.63	9579.85	9579	9580.48
643.81	4740.04	4740.04	4740.04	4740.04	4740.04		640.623	9574	9574.64	9574.86	9574	9575.5
643.71	4741.91	4741.91	4741.91	4741.91	4741.91		640.523	9657	9657.66	9657.88	9657	9658.53
643.61	4742.43	4742.43	4742.43	4742.43	4742.43		640.423	9577	9577.67	9577.89	9577	9578.56
643.51	4743.37	4743.37	4743.37	4743.37	4743.37		640.323	9619	9619.68	9619.9	9619	9620.59
643.41	4752.55	4752.55	4752.55	4752.55	4752.55		640.223	9747	9747.7	9747.91	9747	9748.61
643.31	4740.49	4740.49	4740.49	4740.49	4740.49		640.123	9688	9688.71	9688.93	9688	9689.64
643.21	4754.51	4754.51	4754.51	4754.51	4754.51		640.023	9492	9492.73	9492.94	9492	9493.67
643.11	4746.65	4746.65	4746.65	4746.65	4746.65		639.923	9490	9490.74	9490.95	9490	9491.69
643.01	4741.01	4741.01	4741.01	4741.01	4741.01		639.823	9600	9600.76	9600.96	9600	9601.72
642.91	4756.96	4756.96	4756.96	4756.96	4756.96		639.723	9647	9647.77	9647.97	9647	9648.75
642.81	4755.39	4755.39	4755.39	4755.39	4755.39		639.623	9701	9701.79	9701.99	9701	9702.77
642.71	4752.72	4752.72	4752.72	4752.72	4752.72		639.523	9642	9642.8	9643	9642	9643.8
642.61	4759.48	4759.48	4759.48	4759.48	4759.48		639.423	9727	9727.82	9728.01	9727	9728.83
642.51	4742.68	4742.68	4742.68	4742.68	4742.68		639.323	9694	9694.84	9695.02	9694	9695.86
642.41	4738.81	4738.81	4738.81	4738.81	4738.81		639.223	9652	9652.86	9653.04	9652	9653.89
642.31	4754.93	4754.93	4754.93	4754.93	4754.93		639.123	9673	9673.88	9674.05	9673	9674.93
642.21	4751.36	4751.36	4751.36	4751.36	4751.36		639.023	9706	9706.9	9707.06	9706	9707.96
642.11	4753.07	4753.07	4753.07	4753.07	4753.07		638.923	9674	9674.92	9675.07	9674	9676
642.01	4753.45	4753.45	4753.45	4753.45	4753.45		638.823	9732	9732.94	9733.09	9732	9734.03
641.91	4739.35	4739.35	4739.35	4739.35	4739.35		638.723	9582	9582.96	9583.1	9582	9584.06
641.81	4741.09	4741.09	4741.09	4741.09	4741.09		638.623	9659	9659.99	9660.11	9659	9661.1
641.71	4752.24	4752.24	4752.24	4752.24	4752.24		638.523	9729	9730.01	9730.13	9729	9731.14
641.61	4748.79	4748.79	4748.79	4748.79	4748.79		638.423	9858	9859.03	9859.15	9858	9860.18
641.51	4751.36	4751.36	4751.36	4751.36	4751.36		638.323	9650	9651.05	9651.17	9650	9652.22
641.41	4755.09	4755.09	4755.09	4755.09	4755.09		638.223	9850	9851.07	9851.19	9850	9852.26
641.31	4752.4	4752.4	4752.4	4752.4	4752.4		638.123	9862	9863.09	9863.21	9862	9864.3
641.21	4751.71	4751.71	4751.71	4751.71	4751.71		638.023	9906	9907.12	9907.22	9906	9908.34
641.11	4753.35	4753.35	4753.35	4753.35	4753.35		637.923	9899	9900.15	9900.24	9899	9901.39
641.01	4753.93	4753.93	4753.93	4753.93	4753.93		637.823	9977	9978.18	9978.26	9977	9979.44
640.91	4764.45	4764.45	4764.45	4764.45	4764.45		637.723	10059	10060.2	10060.3	10059	10061.5
640.81	4767.2	4767.2	4767.2	4767.2	4767.2		637.623	10188	10189.2	10189.3	10188	10190.5
640.71	4754.49	4754.49	4754.49	4754.49	4754.49		637.523	10181	10182.3	10182.3	10181	10183.6
640.61	4759.91	4759.91	4759.91	4759.91	4759.91		637.423	10512	10513.3	10513.3	10512	10514.6
640.51	4768.52	4768.52	4768.52	4768.52	4768.52		637.323	10520	10521.3	10521.4	10520	10522.7
640.41	4749.03	4749.03	4749.03	4749.03	4749.03		637.223	10837	10838.4	10838.4	10837	10839.7
640.31	4756.25	4756.25	4756.25	4756.25	4756.25		637.123	11073	11074.4	11074.4	11073	11075.8
640.21	4768.89	4768.89	4768.89	4768.89	4768.89		637.023	11459	11460.4	11460.4	11459	11461.9
640.11	4768.35	4768.35	4768.35	4768.35	4768.35		636.923	11839	11840.5	11840.4	11839	11841.9
640.01	4761.41	4761.41	4761.41	4761.41	4761.41		636.823	12416	12417.5	12417.4	12416	12419
639.91	4765.15	4765.15	4765.15	4765.15	4765.15		636.723	12963	12964.5	12964.5	12963	12966
639.81	4756.27	4756.27	4756.27	4756.27	4756.27		636.623	13669	13670.6	13670.5	13669	13672.1
639.71	4757.23	4757.23	4757.23	4757.23	4757.23		636.523	14277	14278.6	14278.5	14277	14280.1
639.61	4754.8	4754.8	4754.8	4754.8	4754.8		636.423	15157	15158.7	15158.5	15157	15160.2
639.51	4749.4	4749.4	4749.4	4749.4	4749.4		636.323	16007	16008.7	16008.6	16007	16010.3
639.41	4750.4	4750.4	4750.4	4750.4	4750.4		636.223	16944	16945.8	16945.6	16944	16947.4
639.31	4749.63	4749.63	4749.63	4749.63	4749.63		636.123	17405	17406.8	17406.6	17405	17408.5
639.21	4739.55	4739.55	4739.55	4739.55	4739.55		636.023	18127	18128.9	18128.6	18127	18130.5
639.11	4748.44	4748.44	4748.44	4748.44	4748.44		635.923	18594	18595.9	18595.7	18594	18597.6
639.01	4749.95	4749.95	4749.95	4749.95	4749.95		635.823	18588	18590	18589.7	18588	18591.7
638.91	4761.68	4761.68	4761.68	4761.68	4761.68		635.723	18474	18476.1	18475.7	18474	18477.8
638.81	4749.04	4749.04	4749.04	4749.04	4749.04		635.623	18372	18374.1	18373.8	18372	18375.9
638.71	4751.4	4751.4	4751.4	4751.4	4751.4		635.523	17894	17896.2	17895.8	17894	17897.9
638.61	4752.44	4752.44	4752.44	4752.44	4752.44		635.423	17191	17193.2	17192.8	17191	17195
638.51	4757.44	4757.44	4757.44	4757.44	4757.44		635.323	16154	16156.3	16155.8	16154	16158.1
638.41	4754.76	4754.76	4754.76	4754.76	4754.76		635.223	15514	15516.3	15515.8	15514	15518.2
638.31	4756.04	4756.04	4756.04	4756.04	4756.04		635.123	14664	14666.4	14665.9	14664	14668.3
638.21	4753.67	4753.67	4753.67	4753.67	4753.67		635.023	13807	13809.5	13808.9	13807	13811.4
638.11	4757.49	4757.49	4757.49	4757.49	4757.49		634.923	13229	13231.6	13230.9	13229	13233.5
638.01	4745.16	4745.16	4745.16	4745.16	4745.16		634.823	12643	12645.7	12645	12643	12647.7
637.91	4759.48	4759.48	4759.48	4759.48	4759.48		634.723	11972	11974.8	11974	11972	11976.8
637.81	4744.65	4744.65	4744.65	4744.65	4744.65		634.623	11490	11492.8	11492	11490	11494.8
637.71	4756.57	4756.57	4756.57	4756.57	4756.57		634.523	11262	11264.9	11264.1	11262	11267
637.61	4758.39	4758.39	4758.39	4758.39	4758.39		634.423	10897	10900	10899.1	10897	10902.1
637.51	4762.84	4762.84	4762.84	4762.84	4762.84		634.323	10666	10669.1	10668.1	10666	10671.2
637.41	4750.79	4750.79	4750.79	4750.79	4750.79		634.223	10565	10568.2	10567.2	10565	10570.4
637.31	4758.4	4758.4	4758.4	4758.4	4758.4		634.123	10441	10444.3	10443.2	10441	10446.5
637.21	4763.67	4763.67	4763.67	4763.67	4763.67		634.023	10299	10302.4	10301.3	10299	10304.6
637.11	4768.95	4768.95	4768.95	4768.95	4768.95		633.923	10124	10127.5	10126.3	10124	10129.8
637.01	4774.19	4774.19	4774.19	4774.19	4774.19		633.823	10063	10066.6	10065.3	10063	10069
636.91	4764.93	4764.93	4764.93	4764.93	4764.93		633.723	10127	10130.8	10129.4	10127	10133.1
636.81	4765.84	4765.84	4765.84	4765.84	4765.84		633.623	9990	9993.88	9992.43	9990	9996.31
636.71	4769.03	4769.03	4769.03	4769.03	4769.03		633.523	9814	9818.02	9816.47	9814	9820.49
636.61	4768.83	4768.83	4768.83	4768.83	4768.83		633.423	9818	9822.17	9820.52	9818	9824.68
636.51	4771.77	4771.77	4771.77	4771.77	4771.77		633.323	9660	9664.32	9662.57	9660	9666.88
636.41	4764.56	4764.56	4764.56	4764.56	4764.56		633.223	9721	9725.47	9723.61	9721	9728.09
636.31	4756.49	4756.49	4756.49	4756.49	4756.49		633.123	9818	9822.64	9820.66	9818	9825.3
636.21	4769.76	4769.76	4769.76	4769.76	4769.76		633.023	9706	9710.82	9708.71	9706	9713.53
636.11	4784.33	4784.33	4784.33	4784.33	4784.33		632.923	9683	9688	9685.77	9683	9690.76
636.01	4779.67	4779.67	4779.67	4779.67	4779.67		632.823	9740	9745.19	9742.82	9740	9748.01
635.91	4767.16	4767.16	4767.16	4767.16	4767.16		632.723	9708	9713.39	9710.88	9708	9716.27
635.81	4774.59	4774.59	4774.59	4774.59	4774.59		632.623	9810	9815.6	9812.93	9810	9818.54
635.71	4778.81	4778.81	4778.81	4778.81	4778.81		632.523	9794	9799.83	9796.99	9794	9802.82
635.61	4776.65	4776.65	4776.65	4776.65	4776.65		632.423	9804	9810.06	9807.05	9804	9813.11
635.51	4769.47	4769.47	4769.47	4769.47	4769.47		632.323	9887	9893.31	9890.11	9887	9896.42
635.41	4784.53	4784.53	4784.53	4784.53	4784.53		632.223	10034	10040.6	10037.2	10034	10043.7
635.31	4776.92	4776.92	4776.92	4776.92	4776.92		632.123	9888	9894.85	9891.24	9888	9898.09
635.21	4765.29	4765.29	4765.29	4765.29	4765.29		632.023	9912	9919.14	9915.31	9912	9922.45
635.11	4772.28	4772.28	4772.28	4772.28	4772.28		631.923	9762	9769.45	9765.38	9762	9772.82
635.01	4777.2	4777.2	4777.2	4777.2	4777.2		631.823	9899	9906.77	9902.45	9899	9910.22
634.91	4774.96	4774.96	4774.96	4774.96	4774.96		631.723	9787	9795.12	9790.52	9787	9798.64
634.81	4782.72	4782.72	4782.72	4782.72	4782.72		631.623	9839	9847.48	9842.59	9839	9851.08
634.71	4784.55	4784.55	4784.55	4784.55	4784.55		631.523	9872	9880.87	9875.67	9872	9884.54
634.61	4786.45	4786.45	4786.45	4786.45	4786.45		631.423	10091	10100.3	10094.8	10091	10104
634.51	4776.2	4776.2	4776.2	4776.2	4776.2		631.323	9999	10008.7	10002.8	9999	10012.5
634.41	4784.28	4784.28	4784.28	4784.28	4784.28		631.223	10030	10040.2	10033.9	10030	10044.1
634.31	4782.23	4782.23	4782.23	4782.23	4782.23		631.123	10158	10168.7	10162	10158	10172.7
634.21	4790.81	4790.81	4790.81	4790.81	4790.81		631.023	10197	10208.2	10201.1	10197	10212.3
634.11	4792.51	4792.51	4792.51	4792.51	4792.51		630.923	10304	10315.7	10308.2	10304	10319.9
634.01	4795.69	4795.69	4795.69	4795.69	4795.69		630.823	10100	10112.3	10104.3	10100	10116.6
633.91	4789.39	4789.39	4789.39	4789.39	4789.39		630.723	10119	10132	10123.4	10119	10136.4
633.81	4796.07	4796.07	4796.07	4796.07	4796.07		630.623	10179	10192.7	10183.5	10179	10197.1
633.71	4805.21	4805.21	4805.21	4805.21	4805.21		630.523	10210	10224.4	10214.6	10210	10229
633.61	4808.45	4808.45	4808.45	4808.45	4808.45		630.423	10233	10248.2	10237.7	10233	10252.9
633.51	4807.23	4807.23	4807.23	4807.23	4807.23		630.323	10058	10074	10062.8	10058	10078.8
633.41	4796.2	4796.2	4796.2	4796.2	4796.2		630.223	10056	10072.9	10060.9	10056	10077.8
633.31	4798.37	4798.37	4798.37	4798.37	4798.37		630.123	9986	10003.8	9991.04	9986	10008.9
633.21	4806.56	4806.56	4806.56	4806.56	4806.56		630.023	9949	9967.88	9954.17	9949	9973.04
633.11	4811.36	4811.36	4811.36	4811.36	4811.36		629.923	9779	9798.99	9784.29	9779	9804.28
633.01	4814.45	4814.45	4814.45	4814.45	4814.45		629.823	9580	9601.19	9585.43	9580	9606.61
632.91	4821.19	4821.19	4821.19	4821.19	4821.19		629.723	9443	9465.49	9448.56	9443	9471.05
632.81	4825.07	4825.07	4825.07	4825.07	4825.07		629.623	9396	9419.89	9401.7	9396	9425.59
632.71	4825.41	4825.41	4825.41	4825.41	4825.41		629.523	9286	9311.41	9291.85	9286	9317.26
632.61	4821.65	4821.65	4821.65	4821.65	4821.65		629.423	9212	9239.06	9218	9212	9245.06
632.51	4823.07	4823.07	4823.07	4823.07	4823.07		629.323	9172	9200.85	9178.16	9172	9207.01
632.41	4826.68	4826.68	4826.68	4826.68	4826.68		629.223	9081	9111.8	9087.32	9081	9118.12
632.31	4825.16	4825.16	4825.16	4825.16	4825.16		629.123	9158	9190.93	9164.49	9158	9197.42
632.21	4828.88	4828.88	4828.88	4828.88	4828.88		629.023	8970	9005.25	8976.67	8970	9011.92
632.11	4834.61	4834.61	4834.61	4834.61	4834.61		628.923	8940	8977.8	8946.85	8940	8984.65
632.01	4844.49	4844.49	4844.49	4844.49	4844.49		628.823	8864	8904.59	8871.04	8864	8911.63
631.91	4845.17	4845.17	4845.17	4845.17	4845.17		628.723	8887	8930.65	8894.24	8887	8937.89
631.81	4864.49	4864.49	4864.49	4864.49	4864.49		628.623	9050	9097.03	9057.44	9050	9104.47
631.71	4884.39	4884.39	4884.39	4884.39	4884.39		628.523	9056	9106.76	9063.65	9056	9114.41
631.61	4898.35	4898.35	4898.35	4898.35	4898.35		628.423	9093	9147.88	9100.87	9093	9155.75
631.51	4911.11	4911.11	4911.11	4911.11	4911.11		628.323	8888	8947.45	8896.1	8888	8955.56
631.41	4928.77	4928.77	4928.77	4928.77	4928.77		628.223	8780	8931.21	8875.01	8866.67	8939.55
631.31	4942.99	4942.99	4942.99	4942.99	4942.99		628.123	8932	8933.96	8872.34	8863.75	8942.55
631.21	4940.33	4940.33	4940.33	4940.33	4940.33		628.023	8964	8937.36	8869.65	8860.8	8946.21
631.11	4963.35	4963.35	4963.35	4963.35	4963.35		627.923	8921	8941.49	8866.94	8857.82	8950.61
631.01	4977.87	4977.87	4977.87	4977.87	4977.87		627.823	9032	8946.48	8864.2	8854.8	8955.88
630.91	4993.72	4993.72	4993.72	4993.72	4993.72		627.723	8915	8952.47	8861.46	8851.76	8962.17
630.81	4996.32	4996.32	4996.32	4996.32	4996.32		627.623	8988	8959.63	8858.69	8848.69	8969.63
630.71	4974.73	4974.73	4974.73	4974.73	4974.73		627.523	8883	8968.16	8855.91	8845.58	8978.49
630.61	4988.32	4988.32	4988.32	4988.32	4988.32		627.423	9016	8978.31	8853.11	8842.45	8988.97
630.51	4983.17	4983.17	4983.17	4983.17	4983.17		627.323	9133	8990.36	8850.3	8839.29	9001.37
630.41	4964.48	4964.48	4964.48	4964.48	4964.48		627.223	9105	9004.69	8847.48	8836.11	9016.07
630.31	4956.76	4956.76	4956.76	4956.76	4956.76		627.123	9045	9021.74	8844.65	8832.9	9033.5
630.21	4943.23	4943.23	4943.23	4943.23	4943.23		627.023	9042	9042.04	8841.82	8829.66	9054.2
630.11	4922.24	4922.24	4922.24	4922.24	4922.24		626.923	9110	9066.27	8838.98	8826.4	9078.85
630.01	4902.35	4902.35	4902.35	4902.35	4902.35		626.823	9107	9095.31	8836.14	8823.12	9108.33
629.91	4884.19	4884.19	4884.19	4884.19	4884.19		626.723	9272	9130.22	8833.3	8819.81	9143.7
629.81	4870	4870	4870	4870	4870		626.623	9314	9172.35	8830.46	8816.49	9186.32
629.71	4843.79	4843.79	4843.79	4843.79	4843.79		626.523	9391	9223.42	8827.62	8813.15	9237.9
629.61	4840.81	4840.81	4840.81	4840.81	4840.81		626.423	9425	9285.67	8824.8	8809.79	9300.69
629.51	4831.17	4831.17	4831.17	4831.17	4831.17		626.323	9547	9361.99	8821.99	8806.41	9377.56
629.41	4831.83	4831.83	4831.83	4831.83	4831.83		626.223	9578	9456.14	8819.19	8803.02	9472.3
629.31	4810.87	4810.87	4810.87	4810.87	4810.87		626.123	9663	9573.07	8816.42	8799.62	9589.86
629.21	4802.47	4802.47	4802.47	4802.47	4802.47		626.023	9820	9719.3	8813.67	8796.21	9736.75
629.11	4797.11	4797.11	4797.11	4797.11	4797.11		625.923	10005	9903.45	8810.94	8792.8	9921.6
629.01	4798.05	4798.05	4798.05	4798.05	4798.05		625.823	10324	10136.9	8808.26	8789.38	10155.8
628.91	4810.2	4810.2	4810.2	4810.2	4810.2		625.723	10669	10434.4	8805.61	8785.96	10454.1
628.81	4807.69	4807.69	4807.69	4807.69	4807.69		625.623	11089	10815	8803.02	8782.54	10835.4
628.71	4788.65	4788.65	4788.65	4788.65	4788.65		625.523	11605	11301.9	8800.48	8779.14	11323.2
628.61	4796.68	4796.68	4796.68	4796.68	4796.68		625.423	12254	11921.7	8798.02	8775.76	11944
628.51	4789.84	4789.84	4789.84	4789.84	4789.84		625.323	13014	12701.3	8795.65	8772.42	12724.5
628.41	4783.75	4783.75	4783.75	4783.75	4783.75		625.223	13965	13658.9	8793.38	8769.11	13683.2
628.31	4790.21	4790.21	4790.21	4790.21	4790.21		625.123	14971	14789.9	8791.22	8765.86	14815.3
628.21	4790.23	4790.23	4790.23	4790.23	4790.23		625.023	16100	16054.9	8789.21	8762.67	16081.4
628.11	4797.45	4797.45	4797.45	4797.45	4797.45		624.923	17120	17373.5	8787.35	8759.57	17401.2
628.01	4783.87	4783.87	4783.87	4783.87	4783.87		624.823	18405	18643.8	8785.68	8756.57	18672.9
627.91	4784.6	4784.6	4784.6	4784.6	4784.6		624.723	19394	19780.7	8784.21	8753.69	19811.3
627.81	4785.45	4785.45	4785.45	4785.45	4785.45		624.623	20565	20716.1	8782.97	8750.94	20748.2
627.71	4795.31	4795.31	4795.31	4795.31	4795.31		624.523	21318	21401.1	8781.99	8748.34	21434.8
627.61	4803.83	4803.83	4803.83	4803.83	4803.83		624.423	21689	21803.7	8781.27	8745.9	21839
627.51	4804.15	4804.15	4804.15	4804.15	4804.15		624.323	22107	21903.2	8780.85	8743.62	21940.5
627.41	4790.16	4790.16	4790.16	4790.16	4790.16		624.223	21934	21689.3	8780.73	8741.51	21728.5
627.31	4799.57	4799.57	4799.57	4799.57	4799.57		624.123	21499	21165.9	8780.93	8739.57	21207.2
627.21	4804.39	4804.39	4804.39	4804.39	4804.39		624.023	20447	20362.7	8781.45	8737.79	20406.3
627.11	4789.37	4789.37	4789.37	4789.37	4789.37		623.923	19659	19345.2	8782.31	8736.16	19391.3
627.01	4788.33	4788.33	4788.33	4788.33	4788.33		623.823	18607	18211.9	8783.51	8734.67	18260.8
626.91	4803.95	4803.95	4803.95	4803.95	4803.95		623.723	17368	17060.3	8785.05	8733.31	17112
626.81	4805.93	4805.93	4805.93	4805.93	4805.93		623.623	16170	15961.7	8786.93	8732.05	16016.6
626.71	4805.51	4805.51	4805.51	4805.51	4805.51		623.523	14917	14963.5	8789.18	8730.89	15021.8
626.61	4805.28	4805.28	4805.28	4805.28	4805.28		623.423	14012	14087.9	8791.8	8729.81	14149.9
626.51	4809.11	4809.11	4809.11	4809.11	4809.11		623.323	13046	13337.7	8794.82	8728.79	13403.7
626.41	4799.64	4799.64	4799.64	4799.64	4799.64		623.223	12337	12703.8	8798.25	8727.82	12774.2
626.31	4800.59	4800.59	4800.59	4800.59	4800.59		623.123	11875	12171.8	8802.14	8726.89	12247
626.21	4797.31	4797.31	4797.31	4797.31	4797.31		623.023	11420	11726.2	8806.53	8726	11806.7
626.11	4808.68	4808.68	4808.68	4808.68	4808.68		622.923	11159	11352.5	8811.47	8725.14	11438.9
626.01	4800.49	4800.49	4800.49	4800.49	4800.49		622.823	10898	11038.1	8817.01	8724.31	11130.8
625.91	4800.68	4800.68	4800.68	4800.68	4800.68		622.723	10650	10772.3	8823.22	8723.51	10872
625.81	4802.67	4802.67	4802.67	4802.67	4802.67		622.623	10508	10546.5	8830.2	8722.72	10653.9
625.71	4809.29	4809.29	4809.29	4809.29	4809.29		622.523	10333	10353.5	8838.02	8721.95	10469.6
625.61	4815.61	4815.61	4815.61	4815.61	4815.61		622.423	10087	10187.7	8846.82	8721.2	10313.3
625.51	4813.71	4813.47	4813.47	4813.47	4813.47		622.323	10088	10044.4	8856.74	8720.47	10180.7
625.41	4811.09	4814.03	4814.03	4814.03	4814.03		622.223	9991	9920.09	8867.92	8719.74	10068.3
625.31	4829.96	4814.59	4814.59	4814.59	4814.59		622.123	9847	9811.51	8880.52	8719.03	9972.99
625.21	4821.39	4815.15	4815.15	4815.15	4815.15		622.023	9689	9716.21	8894.76	8718.34	9892.63
625.11	4812.31	4815.71	4815.71	4815.71	4815.71		621.923	9796	9632.19	8910.86	8717.65	9825.4
625.01	4825.44	4816.27	4816.28	4816.27	4816.28		621.823	9704	9557.77	8929.12	8716.97	9769.93
624.91	4814.8	4816.83	4816.84	4816.83	4816.84		621.723	9711	9491.59	8949.86	8716.3	9725.15
624.81	4819.31	4817.39	4817.4	4817.39	4817.4		621.623	9734	9432.5	8973.52	8715.64	9690.38
624.71	4828.17	4817.95	4817.97	4817.95	4817.97		621.523	9678	9379.54	9000.53	8714.99	9665.08
624.61	4818.16	4818.51	4818.54	4818.51	4818.54		621.423	9688	9331.9	9031.35	8714.35	9648.89
624.51	4820	4819.07	4819.11	4819.07	4819.11		621.323	9725	9288.92	9066.51	8713.73	9641.71
624.41	4834.09	4819.63	4819.69	4819.63	4819.69		621.223	9743	9250.01	9106.63	8713.11	9643.53
624.31	4834.09	4820.19	4820.28	4820.19	4820.28		621.123	9937	9214.68	9152.35	8712.5	9654.52
624.21	4827.88	4820.75	4820.89	4820.75	4820.89		621.023	9838	9182.51	9204.3	8711.91	9674.9
624.11	4843.27	4821.31	4821.51	4821.31	4821.51		620.923	9857	9153.14	9263.15	8711.33	9704.96
624.01	4837.76	4821.87	4822.16	4821.87	4822.16		620.823	9914	9126.27	9329.55	8710.76	9745.05
623.91	4842.56	4822.43	4822.84	4822.43	4822.84		620.723	10058	9101.62	9403.52	8710.21	9794.93
623.81	4843.31	4822.99	4823.57	4822.99	4823.57		620.623	10010	9078.96	9484.91	8709.67	9854.2
623.71	4824.57	4823.55	4824.36	4823.55	4824.36		620.523	10046	9058.08	9573.06	8709.15	9921.99
623.61	4839.55	4824.11	4825.23	4824.11	4825.23		620.423	10195	9038.8	9666.7	8708.64	9996.85
623.51	4837.24	4824.67	4826.19	4824.67	4826.19		620.323	10150	9020.97	9763.91	8708.16	10076.7
623.41	4840.57	4825.23	4827.28	4825.23	4827.28		620.223	9949	9004.44	9862.18	8707.69	10158.9
623.31	4837.37	4825.79	4828.52	4825.79	4828.53		620.123	10156	8989.1	9958.38	8707.23	10240.2
623.21	4842.13	4826.35	4829.94	4826.35	4829.95		620.023	10103	8974.83	10048.6	8706.8	10316.6
623.11	4839.13	4826.91	4831.58	4826.91	4831.59		619.923	10149	8961.54	10129	8706.38	10384.2
623.01	4840.2	4827.48	4833.47	4827.47	4833.48		619.823	10408	8949.14	10196.7	8705.98	10439.9
622.91	4852.43	4828.04	4835.64	4828.03	4835.66		619.723	10409	8937.57	10249.6	8705.6	10481.6
622.81	4837.93	4828.61	4838.12	4828.59	4838.14		619.623	10321	8926.75	10286.4	8705.25	10507.9
622.71	4840.28	4829.19	4840.92	4829.15	4840.96		619.523	10464	8916.62	10306.5	8704.91	10518.2
622.61	4845.75	4829.77	4844.06	4829.71	4844.12		619.423	10509	8907.14	10309.7	8704.6	10512.3
622.51	4854.12	4830.37	4847.52	4830.27	4847.62		619.323	10356	8898.24	10296	8704.31	10489.9
622.41	4845.15	4830.98	4851.25	4830.83	4851.41		619.223	10394	8889.88	10266.2	8704.04	10452
622.31	4845.04	4831.63	4855.21	4831.39	4855.44		619.123	10542	8882.03	10220.9	8703.8	10399.2
622.21	4859.16	4832.31	4859.29	4831.95	4859.65		619.023	10482	8874.65	10161	8703.58	10332.1
622.11	4871.92	4833.05	4863.38	4832.51	4863.92		618.923	10311	8867.69	10087.6	8703.38	10251.9
622.01	4867.04	4833.87	4867.34	4833.07	4868.13		618.823	10347	8861.15	10002	8703.2	10159.9
621.91	4867.19	4834.8	4870.99	4833.63	4872.16		618.723	10164	8854.97	9906.23	8703.05	10058.2
621.81	4877.67	4835.88	4874.17	4834.19	4875.86		618.623	10113	8849.14	9802.7	8702.91	9948.93
621.71	4861.63	4837.17	4876.73	4834.75	4879.16		618.523	10021	8843.64	9694.48	8702.79	9835.32
621.61	4875.13	4838.74	4878.56	4835.31	4881.99		618.423	9864	8838.43	9585.06	8702.7	9720.79
621.51	4892.41	4840.67	4879.57	4835.87	4884.37		618.323	9668	8833.51	9478.23	8702.61	9609.13
621.41	4891.25	4843.07	4879.7	4836.43	4886.34		618.223	9483	8828.84	9377.3	8702.54	9503.6
621.31	4884.73	4846.09	4879	4836.99	4888.11		618.123	9393	8824.42	9284.62	8702.48	9406.56
621.21	4899.55	4849.86	4877.57	4837.55	4889.88		618.023	9143	8820.22	9201.58	8702.43	9319.37
621.11	4882.01	4854.55	4875.52	4838.11	4891.97		617.923	9127	8816.22	9128.65	8702.38	9242.5
621.01	4889.36	4860.39	4872.99	4838.67	4894.72		617.823	8975	8812.43	9065.93	8702.34	9176.01
620.91	4911.92	4867.61	4870.16	4839.23	4898.55		617.723	9029	8808.81	9012.28	8702.31	9118.79
620.81	4910.69	4876.4	4867.2	4839.79	4903.81		617.623	8917	8805.37	8966.76	8702.27	9069.85
620.71	4913.29	4886.96	4864.23	4840.35	4910.84		617.523	8916	8802.08	8928.31	8702.24	9028.15
620.61	4918.13	4899.52	4861.39	4840.91	4920		617.423	8830	8798.94	8895.93	8702.22	8992.66
620.51	4918.68	4914.27	4858.77	4841.47	4931.57		617.323	8873	8795.95	8868.7	8702.19	8962.45
620.41	4958.47	4931.2	4856.43	4842.03	4945.6		617.223	8832	8793.08	8845.77	8702.17	8936.69
620.31	4969.57	4950.27	4854.4	4842.59	4962.09		617.123	8757	8790.35	8826.51	8702.14	8914.71
620.21	4981.24	4971.32	4852.71	4843.15	4980.88		617.023	8819	8787.73	8810.27	8702.12	8895.87
620.11	5000.64	4994.05	4851.35	4843.71	5001.7		616.923	8665	8785.22	8796.5	8702.1	8879.61
620.01	5016.73	5017.85	4850.3	4844.27	5023.88		616.823	8626	8782.81	8784.78	8702.08	8865.5
619.91	5042.93	5041.99	4849.52	4844.83	5046.68		616.723	8777	8780.5	8774.77	8702.06	8853.21
619.81	5061.13	5065.59	4849	4845.39	5069.2		616.623	8794	8778.29	8766.21	8702.05	8842.45
619.71	5095.36	5087.52	4848.69	4845.95	5090.27		616.523	8838	8776.16	8758.84	8702.03	8832.98
619.61	5100.16	5106.75	4848.57	4846.51	5108.81		616.423	8733	8774.12	8752.49	8702.01	8824.6
619.51	5120.04	5122.24	4848.6	4847.07	5123.77		616.323	8763	8772.16	8747.01	8702	8817.18
619.41	5139.27	5133.11	4848.75	4847.63	5134.24		616.223	8726	8770.28	8742.26	8701.98	8810.55
619.31	5145.68	5138.51	4849	4848.19	5139.33		616.123	8760	8768.47	8738.1	8701.97	8804.6
619.21	5145.29	5138.24	4849.33	4848.75	5138.83		616.023	8707	8766.72	8734.47	8701.95	8799.24
619.11	5135.49	5132.42	4849.72	4849.31	5132.83		615.923	8599	8765.05	8731.28	8701.94	8794.38
619.01	5116.92	5121.46	4850.16	4849.87	5121.75		615.823	8625	8763.43	8728.46	8701.92	8789.97
618.91	5109.99	5105.95	4850.63	4850.43	5106.15		615.723	8690	8761.87	8725.98	8701.91	8785.94
618.81	5086.37	5086.94	4851.12	4850.99	5087.07		615.623	8748	8760.37	8723.78	8701.9	8782.25
618.71	5069.25	5065.55	4851.64	4851.55	5065.64		615.523	8611	8758.92	8721.83	8701.88	8778.86
618.61	5047.16	5042.85	4852.17	4852.11	5042.91		615.423	8606	8757.52	8720.09	8701.87	8775.74
618.51	5018.29	5019.83	4852.71	4852.67	5019.88		615.323	8820	8756.17	8718.53	8701.85	8772.84
618.41	4996.15	4997.4	4853.25	4853.23	4997.43		615.223	8676	8754.86	8717.14	8701.84	8770.16
618.31	4969.96	4976.22	4853.8	4853.79	4976.24		615.123	8648	8753.61	8715.88	8701.83	8767.66
618.21	4956.04	4956.76	4854.36	4854.35	4956.77		615.023	8552	8752.39	8714.76	8701.82	8765.33
618.11	4931.21	4939.35	4854.91	4854.91	4939.36		614.923	8562	8751.21	8713.74	8701.8	8763.14
618.01	4921.29	4924.19	4855.47	4855.47	4924.19		614.823	8612	8750.07	8712.82	8701.79	8761.1
617.91	4896.36	4911.19	4856.03	4856.03	4911.2		614.723	8895	8748.97	8711.98	8701.78	8759.18
617.81	4888.12	4900.28	4856.59	4856.59	4900.28		614.623	8742	8747.91	8711.23	8701.77	8757.37
617.71	4904.33	4891.31	4857.15	4857.15	4891.31		614.523	8664	8746.88	8710.54	8701.76	8755.66
617.61	4891.91	4884.13	4857.71	4857.71	4884.13		614.423	8677	8745.88	8709.92	8701.75	8754.05
617.51	4871.67	4878.44	4858.27	4858.26	4878.45		614.323	8552	8744.92	8709.34	8701.74	8752.52
617.41	4881.69	4874.04	4858.83	4858.82	4874.04		614.223	8733	8743.98	8708.82	8701.73	8751.07
617.31	4882.39	4870.72	4859.38	4859.38	4870.72		614.123	8837	8743.72	8708.34	8701.72	8750.34
617.21	4871.4	4868.31	4859.94	4859.94	4868.31		614.023	8702	8742.81	8707.9	8701.72	8748.99
617.11	4872.23	4866.6	4860.5	4860.5	4866.6		613.923	8747	8741.89	8707.5	8701.71	8747.68
617.01	4877.65	4865.45	4861.06	4861.06	4865.45		613.823	8656	8740.98	8707.13	8701.7	8746.4
616.91	4882.52	4864.75	4861.62	4861.62	4864.75		613.723	8705	8740.07	8706.78	8701.7	8745.15
616.81	4871.05	4864.38	4862.18	4862.18	4864.38		613.623	8790	8739.15	8706.47	8701.69	8743.93
616.71	4871.07	4864.28	4862.74	4862.74	4864.28		613.523	8643	8738.24	8706.17	8701.68	8742.73
616.61	4880.4	4864.36	4863.3	4863.3	4864.36		613.423	8841	8737.54	8705.9	8701.68	8741.77
616.51	4871.23	4864.58	4863.86	4863.86	4864.58		613.323	8801	8736.93	8705.66	8701.67	8740.91
616.41	4872.57	4864.91	4864.42	4864.42	4864.91		613.223	8657	8736.32	8705.43	8701.67	8740.08
616.31	4876.95	4865.31	4864.98	4864.98	4865.31		613.123	8694	8735.71	8705.21	8701.67	8739.26
616.21	4877.11	4865.76	4865.54	4865.54	4865.76		613.023	8798	8735.1	8705.02	8701.67	8738.45
616.11	4876.69	4866.24	4866.1	4866.1	4866.24		612.923	8772	8734.5	8704.83	8701.67	8737.66
616.01	4881.11	4866.75	4866.66	4866.66	4866.75		612.823	8628	8733.89	8704.66	8701.67	8736.88
615.91	4886.17	4867.28	4867.22	4867.22	4867.28		612.723	8705	8736.62	8707.84	8705	8739.45
615.81	4880.89	4867.82	4867.78	4867.78	4867.82		612.623	8875	8906.01	8877.69	8875	8908.7
615.71	4874.2	4868.37	4868.34	4868.34	4868.37		612.523	8786	8816.4	8788.55	8786	8818.95
615.61	4871.99	4868.92	4868.9	4868.9	4868.92		612.423	8841	8870.79	8843.42	8841	8873.21
615.51	4862.43	4869.47	4869.46	4869.46	4869.47		612.323	8882	8911.19	8884.3	8882	8913.49
615.41	4872.97	4870.03	4870.02	4870.02	4870.03		612.223	8753	8781.58	8755.19	8753	8783.77
615.31	4884.83	4870.59	4870.58	4870.58	4870.59		612.123	8569	8596.99	8571.08	8569	8599.07
615.21	4883.56	4871.14	4871.14	4871.14	4871.14		612.023	8834	8861.56	8835.98	8834	8863.54
615.11	4868.77	4871.7	4871.7	4871.7	4871.7
615.01	4875.12	4872.26	4872.26	4872.26	4872.26
614.91	4873.83	4872.82	4872.82	4872.82	4872.82
614.81	4875.92	4873.38	4873.38	4873.38	4873.38
614.71	4867.88	4873.94	4873.94	4873.94	4873.94
614.61	4874.92	4874.5	4874.5	4874.5	4874.5
614.51	4875.12	4875.06	4875.06	4875.06	4875.06
614.41	4877.11	4875.62	4875.62	4875.62	4875.62
614.31	4884	4876.18	4876.18	4876.18	4876.18
614.21	4885.29	4876.74	4876.74	4876.74	4876.74
614.11	4874.71	4877.3	4877.3	4877.3	4877.3
614.01	4872.76	4877.86	4877.86	4877.86	4877.86
613.91	4886.12	4886.12	4886.12	4886.12	4886.12
613.81	4885.56	4885.56	4885.56	4885.56	4885.56
613.71	4876.52	4876.52	4876.52	4876.52	4876.52
613.61	4881.76	4881.76	4881.76	4881.76	4881.76
613.51	4886.44	4886.44	4886.44	4886.44	4886.44
613.41	4878.93	4878.93	4878.93	4878.93	4878.93
613.31	4878.24	4878.24	4878.24	4878.24	4878.24
613.21	4888.4	4888.4	4888.4	4888.4	4888.4
613.11	4889.76	4889.76	4889.76	4889.76	4889.76
613.01	4877.84	4877.84	4877.84	4877.84	4877.84
612.91	4898.41	4898.41	4898.41	4898.41	4898.41
612.81	4896.84	4896.84	4896.84	4896.84	4896.84
612.71	4890.92	4890.92	4890.92	4890.92	4890.92
612.61	4893.47	4893.47	4893.47	4893.47	4893.47
612.51	4883.11	4883.11	4883.11	4883.11	4883.11
612.41	4896.88	4896.88	4896.88	4896.88	4896.88
612.31	4891.65	4891.65	4891.65	4891.65	4891.65
612.21	4895.33	4895.33	4895.33	4895.33	4895.33
612.11	4898.76	4898.76	4898.76	4898.76	4898.76
612.01	4898.51	4898.51	4898.51	4898.51	4898.51
611.91	4893.63	4893.63	4893.63	4893.63	4893.63
611.81	4901.24	4901.24	4901.24	4901.24	4901.24
611.71	4904.04	4904.04	4904.04	4904.04	4904.04
611.61	4905.59	4905.59	4905.59	4905.59	4905.59
611.51	4900.52	4900.52	4900.52	4900.52	4900.52
611.41	4888.04	4888.04	4888.04	4888.04	4888.04
611.31	4895.87	4895.87	4895.87	4895.87	4895.87
611.21	4907.12	4907.12	4907.12	4907.12	4907.12
611.11	4884.99	4884.99	4884.99	4884.99	4884.99
611.01	4894.48	4894.48	4894.48	4894.48	4894.48
610.91	4904.17	4904.17	4904.17	4904.17	4904.17
610.81	4907.37	4907.37	4907.37	4907.37	4907.37
610.71	4903.51	4903.51	4903.51	4903.51	4903.51
610.61	4895	4895	4895	4895	4895
610.51	4905.68	4905.68	4905.68	4905.68	4905.68
610.41	4896.51	4896.51	4896.51	4896.51	4896.51
610.31	4903.67	4903.67	4903.67	4903.67	4903.67
610.21	4905.03	4905.03	4905.03	4905.03	4905.03
610.11	4905.55	4905.55	4905.55	4905.55	4905.55
610.01	4905.93	4905.93	4905.93	4905.93	4905.93
609.91	4892.36	4892.36	4892.36	4892.36	4892.36
609.81	4903.04	4903.04	4903.04	4903.04	4903.04
609.71	4905.99	4905.99	4905.99	4905.99	4905.99
609.61	4907.35	4907.35	4907.35	4907.35	4907.35
609.51	4906.21	4906.21	4906.21	4906.21	4906.21
609.41	4905.25	4905.25	4905.25	4905.25	4905.25
609.31	4901.09	4901.09	4901.09	4901.09	4901.09
609.21	4913.23	4913.23	4913.23	4913.23	4913.23
609.11	4904.03	4904.03	4904.03	4904.03	4904.03
609.01	4913.92	4913.92	4913.92	4913.92	4913.92
608.91	4904.25	4904.25	4904.25	4904.25	4904.25
608.81	4893.72	4893.72	4893.72	4893.72	4893.72
608.71	4896.79	4896.79	4896.79	4896.79	4896.79
608.61	4907.03	4907.03	4907.03	4907.03	4907.03
608.51	4918.76	4918.76	4918.76	4918.76	4918.76
608.41	4910.19	4910.19	4910.19	4910.19	4910.19
608.31	4903.4	4903.4	4903.4	4903.4	4903.4
608.21	4907.64	4907.64	4907.64	4907.64	4907.64

## Sheet: C35 XPS spectra
C35-1							C35-2								C35-33
BE (eV)	Spectra	I-	I0	background	simulation		BE (eV)	Spectra	I5+	I-	I0	background	simulation		BE (eV)	Spectra	I5+	I-	I7+	I0	background	simulation
652.143	6365	6215.03	6215	6215	6290.03		648.204	6327.09	6177.09	6177.22	6177.17	6177.09	6252.3		643.355	16565	14065.2	14065.7	14065.3	14065	14065	15066.2
652.043	6361.57	6211.59	6211.57	6211.57	6286.59		648.104	6312.09	6162.09	6162.22	6162.17	6162.09	6237.3		643.255	16372.5	13872.7	13873.2	13872.8	13872.5	13872.5	14873.7
651.943	6334.43	6184.46	6184.43	6184.43	6259.46		648.004	6347.86	6197.86	6198	6197.94	6197.86	6273.07		643.155	16560	14060.2	14060.7	14060.3	14060	14060	15061.2
651.843	6333.37	6183.39	6183.37	6183.37	6258.39		647.904	6334.32	6184.32	6184.45	6184.4	6184.32	6259.53		643.055	16455	13955.2	13955.7	13955.3	13955	13955	14956.2
651.743	6312.6	6162.63	6162.6	6162.6	6237.63		647.804	6336.59	6186.59	6186.73	6186.67	6186.59	6261.81		642.955	16385	13885.2	13885.7	13885.3	13885	13885	14886.2
651.643	6343.73	6193.76	6193.73	6193.73	6268.76		647.704	6342.27	6192.27	6192.41	6192.35	6192.27	6267.49		642.855	16435	13935.2	13935.7	13935.4	13935	13935	14936.3
651.543	6348.37	6198.39	6198.37	6198.37	6273.39		647.604	6345	6195	6195.14	6195.08	6195	6270.22		642.755	16430	13930.2	13930.7	13930.4	13930	13930	14931.3
651.443	6344.6	6194.63	6194.6	6194.6	6269.63		647.504	6331.5	6181.5	6181.64	6181.58	6181.5	6256.72		642.655	16535	14035.2	14035.7	14035.4	14035	14035	15036.3
651.343	6342.97	6192.99	6192.97	6192.97	6267.99		647.404	6335.23	6185.23	6185.37	6185.31	6185.23	6260.45		642.555	16415	13915.2	13915.7	13915.4	13915	13915	14916.3
651.243	6354.47	6204.49	6204.47	6204.47	6279.49		647.304	6352.45	6202.45	6202.59	6202.54	6202.45	6277.68		642.455	16422.5	13922.7	13923.2	13922.9	13922.5	13922.5	14923.8
651.143	6355.67	6205.69	6205.67	6205.67	6280.69		647.204	6348.32	6198.32	6198.46	6198.4	6198.32	6273.54		642.355	16567.5	14067.7	14068.2	14067.9	14067.5	14067.5	15068.9
651.043	6328	6178.03	6178	6178	6253.03		647.104	6325.59	6175.59	6175.73	6175.68	6175.59	6250.82		642.255	16400	13900.2	13900.7	13900.4	13900	13900	14901.4
650.943	6329.37	6179.4	6179.37	6179.37	6254.4		647.004	6317.64	6167.64	6167.78	6167.72	6167.64	6242.86		642.155	16557.5	14057.7	14058.2	14057.9	14057.5	14057.5	15058.9
650.843	6348.27	6198.3	6198.27	6198.27	6273.3		646.904	6351.73	6201.73	6201.87	6201.81	6201.73	6276.96		642.055	16352.5	13852.7	13853.3	13852.9	13852.5	13852.5	14853.9
650.743	6356.9	6206.93	6206.9	6206.9	6281.93		646.804	6325.59	6175.59	6175.74	6175.68	6175.59	6250.82		641.955	16327.5	13827.8	13828.3	13827.9	13827.5	13827.5	14828.9
650.643	6342.33	6192.36	6192.33	6192.33	6267.36		646.704	6302.68	6152.68	6152.83	6152.77	6152.68	6227.92		641.855	16317.5	13817.8	13818.3	13817.9	13817.5	13817.5	14819
650.543	6340	6190.03	6190	6190	6265.03		646.604	6284.73	6134.73	6134.88	6134.82	6134.73	6209.96		641.755	16097.5	13597.8	13598.3	13598	13597.5	13597.5	14599
650.443	6348.3	6198.33	6198.3	6198.3	6273.33		646.504	6309.05	6159.05	6159.19	6159.13	6159.05	6234.28		641.655	16265	13765.3	13765.8	13765.5	13765	13765	14766.5
650.343	6351.1	6201.13	6201.1	6201.1	6276.13		646.404	6333.41	6183.41	6183.56	6183.5	6183.41	6258.65		641.555	15945	13445.3	13445.8	13445.5	13445	13445	14446.6
650.243	6370.7	6220.73	6220.7	6220.7	6295.73		646.304	6328.91	6178.91	6179.06	6179	6178.91	6254.15		641.455	16327.5	13827.8	13828.3	13828	13827.5	13827.5	14829.1
650.143	6332.8	6182.83	6182.8	6182.8	6257.83		646.204	6318.77	6168.77	6168.93	6168.86	6168.77	6244.02		641.355	16222.5	13722.8	13723.3	13723	13722.5	13722.5	14724.1
650.043	6345.73	6195.76	6195.73	6195.73	6270.76		646.104	6320.18	6170.18	6170.34	6170.27	6170.18	6245.43		641.255	16237.5	13737.8	13738.3	13738	13737.5	13737.5	14739.1
649.943	6362.13	6212.16	6212.13	6212.13	6287.16		646.004	6325.77	6175.77	6175.93	6175.87	6175.77	6251.02		641.155	16300	13800.3	13800.9	13800.5	13800	13800	14801.7
649.843	6354.67	6204.7	6204.67	6204.67	6279.7		645.904	6330.45	6180.45	6180.61	6180.55	6180.45	6255.7		641.055	16237.5	13737.8	13738.4	13738	13737.5	13737.5	14739.2
649.743	6369	6219.03	6219	6219	6294.03		645.804	6351.77	6201.77	6201.93	6201.87	6201.77	6277.02		640.955	16092.5	13592.8	13593.4	13593	13592.5	13592.5	14594.2
649.643	6366.03	6216.07	6216.03	6216.03	6291.07		645.704	6314.09	6164.09	6164.25	6164.19	6164.09	6239.35		640.855	16035	13535.3	13535.9	13535.5	13535	13535	14536.8
649.543	6347.67	6197.7	6197.67	6197.67	6272.7		645.604	6299.77	6149.77	6149.93	6149.87	6149.77	6225.03		640.755	16242.5	13742.8	13743.4	13743.1	13742.5	13742.5	14744.3
649.443	6342.73	6192.77	6192.73	6192.73	6267.77		645.504	6325.91	6175.91	6176.07	6176.01	6175.91	6251.17		640.655	15995	13495.3	13495.9	13495.6	13495	13495	14496.8
649.343	6365.87	6215.9	6215.87	6215.87	6290.9		645.404	6304.95	6154.95	6155.12	6155.05	6154.95	6230.22		640.555	15717.5	13217.8	13218.4	13218.1	13217.5	13217.5	14219.3
649.243	6370	6220.03	6220	6220	6295.03		645.304	6312.86	6162.86	6163.03	6162.96	6162.86	6238.13		640.455	16045	13545.4	13545.9	13545.6	13545	13545	14546.9
649.143	6365.67	6215.7	6215.67	6215.67	6290.7		645.204	6314.73	6164.73	6164.89	6164.83	6164.73	6239.99		640.355	16122.5	13622.9	13623.4	13623.1	13622.5	13622.5	14624.4
649.043	6342.7	6192.73	6192.7	6192.7	6267.73		645.104	6297.55	6147.55	6147.71	6147.65	6147.55	6222.81		640.255	15797.5	13297.9	13298.5	13298.1	13297.5	13297.5	14299.5
648.943	6352.77	6202.8	6202.77	6202.77	6277.8		645.004	6300.5	6150.5	6150.67	6150.6	6150.5	6225.77		640.155	16102.5	13602.9	13603.5	13603.1	13602.5	13602.5	14604.5
648.843	6373.57	6223.6	6223.57	6223.57	6298.6		644.904	6315.86	6165.86	6166.03	6165.97	6165.86	6241.14		640.055	15905	13405.4	13406	13405.7	13405	13405	14407
648.743	6350.6	6200.63	6200.6	6200.6	6275.63		644.804	6297.55	6147.55	6147.72	6147.65	6147.55	6222.82		639.955	16092.5	13592.9	13593.5	13593.2	13592.5	13592.5	14594.6
648.643	6339.37	6189.4	6189.37	6189.37	6264.4		644.704	6293.5	6143.5	6143.67	6143.6	6143.5	6218.78		639.855	16252.5	13752.9	13753.5	13753.2	13752.5	13752.5	14754.6
648.543	6378.57	6228.6	6228.57	6228.57	6303.6		644.604	6289.45	6139.45	6139.63	6139.56	6139.45	6214.73		639.755	16292.5	13792.9	13793.5	13793.2	13792.5	13792.5	14794.6
648.443	6369.73	6219.77	6219.73	6219.73	6294.77		644.504	6298.5	6148.5	6148.68	6148.61	6148.5	6223.78		639.655	16120	13620.4	13621	13620.7	13620	13620	14622.2
648.343	6352.83	6202.87	6202.83	6202.83	6277.87		644.404	6318.05	6168.05	6168.22	6168.15	6168.05	6243.33		639.555	16015	13515.4	13516.1	13515.8	13515	13515	14517.2
648.243	6359.67	6209.7	6209.67	6209.67	6284.7		644.304	6318.73	6168.73	6168.91	6168.84	6168.73	6244.01		639.455	16320	13820.4	13821.1	13820.8	13820	13820	14822.3
648.143	6363.67	6213.7	6213.67	6213.67	6288.7		644.204	6303.55	6153.55	6153.73	6153.65	6153.55	6228.84		639.355	16427.5	13928	13928.6	13928.3	13927.5	13927.5	14929.8
648.043	6334.67	6184.7	6184.67	6184.67	6259.7		644.104	6289.91	6139.91	6140.09	6140.02	6139.91	6215.2		639.255	16270	13770.5	13771.1	13770.8	13770	13770	14772.4
647.943	6343.47	6193.5	6193.47	6193.47	6268.5		644.004	6311.77	6161.77	6161.96	6161.88	6161.77	6237.07		639.155	16782.5	14283	14283.6	14283.3	14282.5	14282.5	15284.9
647.843	6355.4	6205.44	6205.4	6205.4	6280.44		643.904	6301.95	6151.95	6152.14	6152.07	6151.95	6227.25		639.055	16927.5	14428	14428.6	14428.4	14427.5	14427.5	15430
647.743	6364.1	6214.14	6214.1	6214.1	6289.14		643.804	6310.55	6160.55	6160.73	6160.66	6160.55	6235.85		638.955	17022.5	14523	14523.7	14523.4	14522.5	14522.5	15525
647.643	6364.87	6214.9	6214.87	6214.87	6289.9		643.704	6299.91	6149.91	6150.1	6150.02	6149.91	6225.21		638.855	17027.5	14528	14528.7	14528.4	14527.5	14527.5	15530.1
647.543	6360.13	6210.17	6210.13	6210.13	6285.17		643.604	6306.95	6156.96	6157.14	6157.07	6156.95	6232.26		638.755	17402.5	14903	14903.7	14903.4	14902.5	14902.5	15905.1
647.443	6391.03	6241.07	6241.03	6241.03	6316.07		643.504	6295.45	6145.46	6145.65	6145.57	6145.45	6220.76		638.655	17677.5	15178	15178.7	15178.5	15177.5	15177.5	16180.2
647.343	6372.53	6222.57	6222.53	6222.53	6297.57		643.404	6311.59	6161.59	6161.78	6161.71	6161.59	6236.9		638.555	17920	15420.6	15421.2	15421	15420	15420	16422.8
647.243	6375.37	6225.41	6225.37	6225.37	6300.41		643.304	6300.82	6150.82	6151.01	6150.94	6150.82	6226.13		638.455	18145	15645.6	15646.2	15646	15645	15645	16647.8
647.143	6383.07	6233.11	6233.07	6233.07	6308.11		643.204	6303	6153	6153.2	6153.12	6153	6228.32		638.355	18662.5	16163.1	16163.7	16163.5	16162.5	16162.5	17165.4
647.043	6388.33	6238.37	6238.33	6238.33	6313.37		643.104	6303.09	6153.09	6153.29	6153.21	6153.09	6228.41		638.255	19090	16590.6	16591.3	16591.1	16590	16590	17592.9
646.943	6400.43	6250.47	6250.43	6250.43	6325.47		643.004	6312	6162	6162.2	6162.12	6162	6237.32		638.155	19265	16765.6	16766.3	16766.1	16765	16765	17768
646.843	6390.33	6240.37	6240.33	6240.33	6315.37		642.904	6300.73	6150.73	6150.93	6150.85	6150.73	6226.05		638.055	19395	16895.6	16896.3	16896.1	16895	16895	17898.1
646.743	6376.57	6226.61	6226.57	6226.57	6301.61		642.804	6295.41	6145.41	6145.61	6145.53	6145.41	6220.74		637.955	19930	17430.7	17431.3	17431.2	17430	17430	18433.1
646.643	6382	6232.04	6232	6232	6307.04		642.704	6300.91	6150.91	6151.12	6151.04	6150.91	6226.24		637.855	20120	17620.7	17621.3	17621.2	17620	17620	18623.2
646.543	6419.27	6269.31	6269.27	6269.27	6344.31		642.604	6294.36	6144.36	6144.57	6144.49	6144.36	6219.7		637.755	20435	17935.7	17936.4	17936.2	17935	17935	18938.3
646.443	6394.43	6244.48	6244.43	6244.43	6319.48		642.504	6271.41	6121.41	6121.62	6121.54	6121.41	6196.75		637.655	20792.5	18293.2	18293.9	18293.8	18292.5	18292.5	19295.9
646.343	6373.47	6223.51	6223.47	6223.47	6298.51		642.404	6287.27	6137.27	6137.49	6137.4	6137.27	6212.62		637.555	20840	18340.7	18341.4	18341.3	18340	18340	19343.5
646.243	6386.47	6236.51	6236.47	6236.47	6311.51		642.304	6299.32	6149.32	6149.53	6149.45	6149.32	6224.66		637.455	21167.5	18668.3	18668.9	18668.9	18667.5	18667.5	19671
646.143	6394.33	6244.38	6244.33	6244.33	6319.38		642.204	6279.64	6129.64	6129.85	6129.77	6129.64	6204.99		637.355	21525	19025.8	19026.5	19026.4	19025	19025	20028.6
646.043	6394.83	6244.88	6244.83	6244.83	6319.88		642.104	6298.73	6148.73	6148.95	6148.86	6148.73	6224.08		637.255	21680	19180.8	19181.5	19181.4	19180	19180	20183.7
645.943	6400.17	6250.21	6250.17	6250.17	6325.21		642.004	6314.23	6164.23	6164.45	6164.36	6164.23	6239.58		637.155	21970	19470.8	19471.5	19471.5	19470	19470	20473.8
645.843	6427.43	6277.48	6277.43	6277.43	6352.48		641.904	6317.91	6167.91	6168.13	6168.05	6167.91	6243.27		637.055	22247.5	19748.3	19749	19749	19747.5	19747.5	20751.4
645.743	6413.3	6263.35	6263.3	6263.3	6338.35		641.804	6303.73	6153.73	6153.95	6153.87	6153.73	6229.09		636.955	22715	20215.9	20216.6	20216.6	20215	20215	21219
645.643	6404.47	6254.51	6254.47	6254.47	6329.51		641.704	6291.27	6141.27	6141.5	6141.41	6141.27	6216.64		636.855	23272.5	20773.4	20774.1	20774.1	20772.5	20772.5	21776.6
645.543	6381.63	6231.68	6231.63	6231.63	6306.68		641.604	6293.27	6143.27	6143.5	6143.41	6143.27	6218.64		636.755	23525	21025.9	21026.6	21026.7	21025	21025	22029.2
645.443	6409.2	6259.25	6259.2	6259.2	6334.25		641.504	6286.68	6136.68	6136.91	6136.82	6136.68	6212.06		636.655	23935	21435.9	21436.6	21436.8	21435	21435	22439.3
645.343	6433.53	6283.58	6283.53	6283.53	6358.58		641.404	6280.82	6130.82	6131.05	6130.96	6130.82	6206.2		636.555	24700	22201	22201.7	22201.8	22200	22200	23204.4
645.243	6420.7	6270.75	6270.7	6270.7	6345.75		641.304	6290.27	6140.27	6140.51	6140.42	6140.27	6215.66		636.455	25285	22786	22786.7	22786.9	22785	22785	23789.6
645.143	6410.53	6260.58	6260.53	6260.53	6335.58		641.204	6283.32	6133.32	6133.56	6133.47	6133.32	6208.71		636.355	26130	23631	23631.7	23631.9	23630	23630	24634.7
645.043	6419.03	6269.08	6269.03	6269.03	6344.08		641.104	6288.55	6138.55	6138.79	6138.69	6138.55	6213.94		636.255	26712.5	24213.6	24214.2	24214.5	24212.5	24212.5	25217.3
644.943	6398.7	6248.75	6248.7	6248.7	6323.75		641.004	6273.59	6123.59	6123.83	6123.74	6123.59	6198.99		636.155	27610	25111.1	25111.8	25112.1	25110	25110	26114.9
644.843	6435.5	6285.55	6285.5	6285.5	6360.55		640.904	6298.77	6148.77	6149.02	6148.93	6148.77	6224.17		636.055	27865	25366.1	25366.8	25367.2	25365	25365	26370.1
644.743	6434.1	6284.15	6284.1	6284.1	6359.15		640.804	6315.27	6165.27	6165.52	6165.43	6165.27	6240.68		635.955	27807.5	25308.6	25309.3	25309.7	25307.5	25307.5	26312.7
644.643	6445.83	6295.88	6295.83	6295.83	6370.88		640.704	6283.59	6133.59	6133.84	6133.75	6133.59	6209		635.855	28130	25631.2	25631.8	25632.3	25630	25630	26635.3
644.543	6413.93	6263.99	6263.93	6263.93	6338.99		640.604	6272.18	6122.18	6122.44	6122.34	6122.18	6197.59		635.755	27605	25106.2	25106.9	25107.4	25105	25105	26110.5
644.443	6406.83	6256.89	6256.83	6256.83	6331.89		640.504	6284.09	6134.09	6134.35	6134.25	6134.09	6209.51		635.655	27052.5	24553.7	24554.4	24555	24552.5	24552.5	25558.1
644.343	6470.57	6320.62	6320.57	6320.57	6395.62		640.404	6275.59	6125.59	6125.85	6125.75	6125.59	6201.01		635.555	26665	24166.3	24166.9	24167.6	24165	24165	25170.8
644.243	6435.63	6285.69	6285.63	6285.63	6360.69		640.304	6279.36	6129.36	6129.63	6129.53	6129.36	6204.79		635.455	25722.5	23223.8	23224.5	23225.2	23222.5	23222.5	24228.5
644.143	6447	6297.05	6297	6297	6372.05		640.204	6262.05	6112.05	6112.31	6112.21	6112.05	6187.48		635.355	24790	22291.4	22292	22292.8	22290	22290	23296.2
644.043	6429	6279.05	6279	6279	6354.05		640.104	6277.68	6127.68	6127.95	6127.85	6127.68	6203.12		635.255	23867.5	21368.9	21369.6	21370.4	21367.5	21367.5	22373.9
643.943	6432.7	6282.76	6282.7	6282.7	6357.76		640.004	6264.5	6114.5	6114.77	6114.67	6114.5	6189.94		635.155	22757.5	20259	20259.6	20260.5	20257.5	20257.5	21264.1
643.843	6441.97	6292.02	6291.97	6291.97	6367.02		639.904	6270.59	6120.59	6120.86	6120.76	6120.59	6196.03		635.055	21275	18776.5	18777.2	18778.1	18775	18775	19781.8
643.743	6436.43	6286.49	6286.43	6286.43	6361.49		639.804	6258.41	6108.41	6108.68	6108.58	6108.41	6183.86		634.955	20352.5	17854.1	17854.7	17855.7	17852.5	17852.5	18859.5
643.643	6421.47	6271.52	6271.47	6271.47	6346.52		639.704	6281.14	6131.14	6131.41	6131.31	6131.14	6206.59		634.855	19557.5	17059.1	17059.7	17060.9	17057.5	17057.5	18064.7
643.543	6439.57	6289.62	6289.57	6289.57	6364.62		639.604	6267.23	6117.23	6117.51	6117.4	6117.23	6192.69		634.755	18762.5	16264.2	16264.7	16266	16262.5	16262.5	17269.9
643.443	6460.43	6310.49	6310.43	6310.43	6385.49		639.504	6288.91	6138.91	6139.19	6139.09	6138.91	6214.37		634.655	18405	15906.7	15907.3	15908.6	15905	15905	16912.7
643.343	6426.1	6276.16	6276.1	6276.1	6351.16		639.404	6274.77	6124.77	6125.06	6124.95	6124.77	6200.24		634.555	17940	15441.8	15442.3	15443.8	15440	15440	16447.9
643.243	6420.93	6270.99	6270.93	6270.93	6345.99		639.304	6276.73	6126.73	6127.02	6126.91	6126.73	6202.2		634.455	17485	14986.9	14987.3	14989	14985	14985	15993.2
643.143	6434.63	6284.69	6284.63	6284.63	6359.69		639.204	6284.18	6134.18	6134.48	6134.37	6134.18	6209.66		634.355	17065	14566.9	14567.4	14569.1	14565	14565	15573.5
643.043	6447.73	6297.79	6297.73	6297.73	6372.79		639.104	6280.68	6130.68	6130.98	6130.87	6130.68	6206.17		634.255	16807.5	14309.5	14309.9	14311.8	14307.5	14307.5	15316.3
642.943	6444.5	6294.56	6294.5	6294.5	6369.56		639.004	6267.09	6117.09	6117.39	6117.28	6117.09	6192.58		634.155	16610	14112.1	14112.5	14114.5	14110	14110	15119.1
642.843	6445.53	6295.6	6295.53	6295.53	6370.6		638.904	6263.18	6113.18	6113.49	6113.37	6113.18	6188.68		634.055	16497.5	13999.7	14000	14002.2	13997.5	13997.5	15006.9
642.743	6425.23	6275.3	6275.23	6275.23	6350.3		638.804	6277.18	6127.18	6127.49	6127.38	6127.18	6202.68		633.955	16710	14212.3	14212.6	14214.9	14210	14210	15219.7
642.643	6443.63	6293.7	6293.63	6293.63	6368.7		638.704	6279.91	6129.91	6130.22	6130.11	6129.91	6205.42		633.855	16385	13887.3	13887.6	13890.1	13885	13885	14895.1
642.543	6417.37	6267.43	6267.37	6267.37	6342.43		638.604	6281	6131	6131.31	6131.2	6131	6206.51		633.755	16407.5	13909.9	13910.2	13912.9	13907.5	13907.5	14918
642.443	6412.13	6262.2	6262.13	6262.13	6337.2		638.504	6283.68	6133.68	6134	6133.88	6133.68	6209.2		633.655	16115	13617.5	13617.7	13620.6	13615	13615	14625.9
642.343	6393.37	6243.43	6243.37	6243.37	6318.43		638.404	6310.09	6160.09	6160.41	6160.3	6160.09	6235.62		633.555	16022.5	13525.1	13525.3	13528.4	13522.5	13522.5	14533.8
642.243	6405.13	6255.2	6255.13	6255.13	6330.2		638.304	6300.73	6150.73	6151.05	6150.93	6150.73	6226.26		633.455	16022.5	13525.2	13525.3	13528.6	13522.5	13522.5	14534.2
642.143	6438.3	6288.37	6288.3	6288.3	6363.37		638.204	6282.05	6132.05	6132.37	6132.26	6132.05	6207.59		633.355	15857.5	13360.3	13360.4	13363.9	13357.5	13357.5	14369.7
642.043	6426.57	6276.63	6276.57	6276.57	6351.63		638.104	6287.68	6137.68	6138.01	6137.89	6137.68	6213.23		633.255	15957.5	13460.5	13460.5	13464.3	13457.5	13457.5	14470.2
641.943	6414.73	6264.8	6264.73	6264.73	6339.8		638.004	6303.14	6153.14	6153.47	6153.35	6153.14	6228.69		633.155	15990	13493.1	13493	13497.1	13490	13490	14503.2
641.843	6446.03	6296.1	6296.03	6296.03	6371.1		637.904	6317.41	6167.41	6167.75	6167.63	6167.41	6242.97		633.055	15857.5	13360.7	13360.6	13364.9	13357.5	13357.5	14371.2
641.743	6442.5	6292.57	6292.5	6292.5	6367.57		637.804	6323.14	6173.14	6173.48	6173.36	6173.14	6248.7		632.955	15852.5	13355.9	13355.6	13360.3	13352.5	13352.5	14366.8
641.643	6434.27	6284.34	6284.27	6284.27	6359.34		637.704	6358	6208	6208.35	6208.22	6208	6283.57		632.855	15752.5	13256	13255.7	13260.7	13252.5	13252.5	14267.4
641.543	6434.2	6284.27	6284.2	6284.2	6359.27		637.604	6364.45	6214.46	6214.81	6214.68	6214.45	6290.04		632.755	16237.5	13741.2	13740.8	13746.2	13737.5	13737.5	14753.1
641.443	6434.53	6284.61	6284.53	6284.53	6359.61		637.504	6378.41	6228.41	6228.77	6228.64	6228.41	6304		632.655	16105	13608.8	13608.3	13614.1	13605	13605	14621.3
641.343	6455.67	6305.74	6305.67	6305.67	6380.74		637.404	6413.05	6263.05	6263.41	6263.28	6263.05	6338.64		632.555	16170	13674	13673.4	13679.6	13670	13670	14687
641.243	6448.07	6298.14	6298.07	6298.07	6373.14		637.304	6460.73	6310.73	6311.09	6310.96	6310.73	6386.33		632.455	16317.5	13821.7	13821	13827.6	13817.5	13817.5	14835.3
641.143	6437.2	6287.28	6287.2	6287.2	6362.28		637.204	6488.64	6338.64	6339.01	6338.87	6338.64	6414.25		632.355	16245	13749.4	13748.6	13755.7	13745	13745	14763.6
641.043	6408.77	6258.84	6258.77	6258.77	6333.84		637.104	6517.18	6367.18	6367.56	6367.42	6367.18	6442.8		632.255	16350	13854.6	13853.6	13861.3	13850	13850	14869.5
640.943	6417.7	6267.78	6267.7	6267.7	6342.78		637.004	6601.64	6451.64	6452.01	6451.88	6451.64	6527.26		632.155	16472.5	13977.3	13976.2	13984.5	13972.5	13972.5	14993
640.843	6420.3	6270.38	6270.3	6270.3	6345.38		636.904	6686.95	6536.96	6537.34	6537.2	6536.95	6612.59		632.055	16447.5	13952.5	13951.3	13960.2	13947.5	13947.5	14969
640.743	6452.1	6302.18	6302.1	6302.1	6377.18		636.804	6727.45	6577.46	6577.84	6577.71	6577.45	6653.1		631.955	16095	13600.3	13598.9	13608.4	13595	13595	14617.6
640.643	6418.97	6269.05	6268.97	6268.97	6344.05		636.704	6787.64	6637.64	6638.03	6637.89	6637.64	6713.29		631.855	16487.5	13993	13991.5	14001.7	13987.5	13987.5	15011.2
640.543	6430.13	6280.21	6280.13	6280.13	6355.21		636.604	6852.14	6702.14	6702.53	6702.4	6702.14	6777.8		631.755	16570	14075.8	14074.1	14085.1	14070	14070	15094.9
640.443	6438.87	6288.95	6288.87	6288.87	6363.95		636.504	6921.95	6771.96	6772.36	6772.22	6771.95	6847.62		631.655	16452.5	13958.6	13956.7	13968.5	13952.5	13952.5	14978.8
640.343	6418.6	6268.68	6268.6	6268.6	6343.68		636.404	7002.09	6852.09	6852.5	6852.36	6852.09	6927.77		631.555	16655	14161.4	14159.2	14172	14155	14155	15182.7
640.243	6424.3	6274.38	6274.3	6274.3	6349.38		636.304	7030.14	6880.14	6880.55	6880.41	6880.14	6955.82		631.455	16550	14056.7	14054.3	14068.1	14050	14050	15079.2
640.143	6410.5	6260.59	6260.5	6260.5	6335.59		636.204	7032.23	6882.23	6882.65	6882.5	6882.23	6957.92		631.355	16502.5	14009.6	14006.9	14021.8	14002.5	14002.5	15033.4
640.043	6420.1	6270.19	6270.1	6270.1	6345.19		636.104	7031	6881	6881.42	6881.28	6881	6956.71		631.255	16570	14077.5	14074.6	14090.6	14070	14070	15102.6
639.943	6444.03	6294.12	6294.03	6294.03	6369.12		636.004	7018.86	6868.87	6869.29	6869.15	6868.86	6944.58		631.155	16557.5	14065.4	14062.2	14079.5	14057.5	14057.5	15092.1
639.843	6403.4	6253.49	6253.4	6253.4	6328.49		635.904	6978	6828	6828.44	6828.29	6828	6903.72		631.055	16667.5	14175.8	14172.3	14191	14167.5	14167.5	15204.1
639.743	6424.07	6274.16	6274.07	6274.07	6349.16		635.804	6948.68	6798.69	6799.12	6798.97	6798.68	6874.42		630.955	16705	14213.8	14209.9	14230.2	14205	14205	15243.9
639.643	6402.17	6252.26	6252.17	6252.17	6327.26		635.704	6886.82	6736.82	6737.26	6737.11	6736.82	6812.56		630.855	16630	14139.3	14135	14157	14130	14130	15171.3
639.543	6420.77	6270.86	6270.77	6270.77	6345.86		635.604	6822.73	6672.73	6673.18	6673.03	6672.73	6748.48		630.755	16640	14149.8	14145.1	14169	14140	14140	15184
639.443	6421.63	6271.73	6271.63	6271.63	6346.73		635.504	6755.91	6605.91	6606.37	6606.21	6605.91	6681.68		630.655	16867.5	14377.9	14372.8	14398.7	14367.5	14367.5	15414.4
639.343	6430.27	6280.36	6280.27	6280.27	6355.36		635.404	6696.91	6546.91	6547.37	6547.22	6546.91	6622.69		630.555	16677.5	14188.5	14182.9	14211.1	14177.5	14177.5	15227.5
639.243	6415	6265.1	6265	6265	6340.1		635.304	6603.18	6453.19	6453.65	6453.5	6453.18	6528.97		630.455	16645	14156.7	14150.5	14181.2	14145	14145	15198.5
639.143	6408.8	6258.9	6258.8	6258.8	6333.9		635.204	6568.68	6418.69	6419.16	6419	6418.68	6494.48		630.355	16657.5	14169.9	14163.2	14196.6	14157.5	14157.5	15214.7
639.043	6408.37	6258.46	6258.37	6258.37	6333.46		635.104	6513.91	6363.91	6364.39	6364.23	6363.91	6439.72		630.255	16292.5	13805.7	13798.3	13834.8	13792.5	13792.5	14853.9
638.943	6399.47	6249.57	6249.47	6249.47	6324.57		635.004	6476.05	6326.05	6326.54	6326.37	6326.05	6401.87		630.155	16117.5	13631.6	13623.5	13663.4	13617.5	13617.5	14683.4
638.843	6399.77	6249.87	6249.77	6249.77	6324.87		634.904	6455.18	6305.19	6305.68	6305.52	6305.18	6381.02		630.055	16082.5	13597.5	13588.6	13632.3	13582.5	13582.5	14653.4
638.743	6391.63	6241.74	6241.63	6241.63	6316.74		634.804	6414.32	6264.32	6264.82	6264.66	6264.32	6340.17		629.955	15865	13381	13371.3	13419.2	13365	13365	14441.4
638.643	6397.7	6247.8	6247.7	6247.7	6322.8		634.704	6429.32	6279.32	6279.83	6279.66	6279.32	6355.18		629.855	15502.5	13019.6	13008.9	13061.5	13002.5	13002.5	14085
638.543	6397.5	6247.6	6247.5	6247.5	6322.6		634.604	6414.41	6264.42	6264.93	6264.76	6264.41	6340.28		629.755	15475	12993.3	12981.6	13039.4	12975	12975	14064.3
638.443	6377.23	6227.34	6227.23	6227.23	6302.34		634.504	6396.05	6246.05	6246.57	6246.4	6246.05	6321.93		629.655	15272.5	12792	12779.3	12843	12772.5	12772.5	13869.4
638.343	6427.37	6277.47	6277.37	6277.37	6352.47		634.404	6396.82	6246.83	6247.35	6247.18	6246.82	6322.72		629.555	14990	12510.9	12497	12567.3	12490	12490	13595.3
638.243	6419.43	6269.54	6269.43	6269.43	6344.54		634.304	6373.73	6223.73	6224.27	6224.1	6223.73	6299.64		629.455	14742.5	12265	12249.7	12327.5	12242.5	12242.5	13357.2
638.143	6401.1	6251.21	6251.1	6251.1	6326.21		634.204	6347.68	6197.69	6198.23	6198.06	6197.68	6273.61		629.355	14667.5	12191.7	12174.9	12261.2	12167.5	12167.5	13292.7
638.043	6420.73	6270.85	6270.73	6270.73	6345.85		634.104	6356.23	6206.24	6206.79	6206.61	6206.23	6282.17		629.255	14422.5	11948.5	11930.1	12026	11922.5	11922.5	13059.6
637.943	6421.7	6271.81	6271.7	6271.7	6346.81		634.004	6344	6194.01	6194.57	6194.39	6194	6269.96		629.155	14610	12138	12117.8	12224.6	12110	12110	13260.4
637.843	6430.03	6280.15	6280.03	6280.03	6355.15		633.904	6311.95	6161.96	6162.53	6162.35	6161.95	6237.93		629.055	14552.5	12082.8	12060.5	12179.8	12052.5	12052.5	13218.1
637.743	6414.63	6264.75	6264.63	6264.63	6339.75		633.804	6335.59	6185.6	6186.17	6185.99	6185.59	6261.58		628.955	14615	12147.7	12123.3	12256.8	12115	12115	13297.8
637.643	6408.83	6258.95	6258.83	6258.83	6333.95		633.704	6331.18	6181.19	6181.77	6181.59	6181.18	6257.19		628.855	14457.5	11993	11966	12115.9	11957.5	11957.5	13159.9
637.543	6452.5	6302.62	6302.5	6302.5	6377.62		633.604	6320.14	6170.15	6170.74	6170.55	6170.14	6246.16		628.755	14305	11869.3	11839.6	12008.4	11830.8	11830.8	13055.7
637.443	6397.57	6247.69	6247.57	6247.57	6322.69		633.504	6323.73	6173.74	6174.34	6174.15	6173.73	6249.77		628.655	14230	11855.2	11822.3	12013.1	11813.3	11813.3	13064
637.343	6419.4	6269.52	6269.4	6269.4	6344.52		633.404	6299.86	6149.87	6150.48	6150.29	6149.86	6225.92		628.555	14495	11841.2	11804.8	12021.1	11795.5	11795.5	13076
637.243	6415.63	6265.76	6265.63	6265.63	6340.76		633.304	6306.77	6156.78	6157.4	6157.21	6156.77	6232.85		628.455	14337.5	11827.5	11787.2	12033.1	11777.6	11777.6	13092.5
637.143	6417.93	6268.06	6267.93	6267.93	6343.06		633.204	6318.41	6168.42	6169.05	6168.85	6168.41	6244.5		628.355	14512.5	11814.1	11769.5	12050.1	11759.6	11759.6	13114.5
637.043	6409.4	6259.53	6259.4	6259.4	6334.53		633.104	6333.27	6183.29	6183.92	6183.72	6183.27	6259.38		628.255	14357.5	11801.2	11751.6	12073.1	11741.4	11741.4	13143.1
636.943	6422.03	6272.16	6272.03	6272.03	6347.16		633.004	6328.68	6178.7	6179.34	6179.14	6178.68	6254.81		628.155	14465	11788.7	11733.5	12103.2	11723	11723	13179.5
636.843	6444.23	6294.37	6294.23	6294.23	6369.37		632.904	6333.14	6183.15	6183.81	6183.61	6183.14	6259.29		628.055	14290	11776.9	11715.3	12142.1	11704.4	11704.4	13225.4
636.743	6417.2	6267.34	6267.2	6267.2	6342.34		632.804	6347.77	6197.79	6198.45	6198.25	6197.77	6273.95		627.955	14485	11765.8	11697	12191.6	11685.8	11685.8	13282.9
636.643	6405.87	6256	6255.87	6255.87	6331		632.704	6359.95	6209.97	6210.64	6210.44	6209.95	6286.15		627.855	14680	11755.6	11678.5	12254.1	11666.9	11666.9	13354.4
636.543	6421.17	6271.31	6271.17	6271.17	6346.31		632.604	6361.68	6211.7	6212.38	6212.18	6211.68	6287.9		627.755	15122.5	11746.6	11659.9	12332.3	11648	11648	13442.8
636.443	6443.9	6294.04	6293.9	6293.9	6369.04		632.504	6342.95	6192.97	6193.67	6193.46	6192.95	6269.19		627.655	15117.5	11738.8	11641.2	12429.4	11628.9	11628.9	13551.7
636.343	6407.97	6258.11	6257.97	6257.97	6333.11		632.404	6357.86	6207.88	6208.59	6208.38	6207.86	6284.13		627.555	15055	11732.6	11622.5	12549.6	11609.7	11609.7	13685.3
636.243	6445.07	6295.21	6295.07	6295.07	6370.21		632.304	6393.5	6243.52	6244.24	6244.03	6243.5	6319.79		627.455	15292.5	11728.4	11603.6	12697.1	11590.4	11590.4	13848.4
636.143	6454.93	6305.08	6304.93	6304.93	6380.08		632.204	6391.32	6241.34	6242.07	6241.86	6241.32	6317.63		627.355	15542.5	11726.5	11584.7	12877	11571	11571	14046.1
636.043	6445.2	6295.35	6295.2	6295.2	6370.35		632.104	6398.73	6248.75	6249.49	6249.27	6248.73	6325.06		627.255	15792.5	11727.4	11565.7	13094.2	11551.5	11551.5	14284.3
635.943	6439.33	6289.49	6289.33	6289.33	6364.49		632.004	6405.05	6255.07	6255.82	6255.6	6255.05	6331.4		627.155	16315	11731.7	11546.6	13353.5	11532	11532	14568
635.843	6430.3	6280.46	6280.3	6280.3	6355.46		631.904	6399.09	6249.11	6249.88	6249.66	6249.09	6325.47		627.055	16575	11740.3	11527.6	13658.5	11512.4	11512.4	14901.6
635.743	6425.77	6275.92	6275.77	6275.77	6350.92		631.804	6402.82	6252.84	6253.62	6253.39	6252.82	6329.22		626.955	17030	11754	11508.5	14010.4	11492.8	11492.8	15287.5
635.643	6438.23	6288.39	6288.23	6288.23	6363.39		631.704	6434.73	6284.75	6285.54	6285.32	6284.73	6361.16		626.855	17452.5	11774	11489.5	14407	11473.1	11473.1	15724.2
635.543	6445.77	6295.93	6295.77	6295.77	6370.93		631.604	6444.86	6294.89	6295.69	6295.47	6294.86	6371.33		626.755	17775	11802.1	11470.5	14840.3	11453.5	11453.5	16205.9
635.443	6448.37	6298.53	6298.37	6298.37	6373.53		631.504	6447.73	6297.76	6298.57	6298.35	6297.73	6374.22		626.655	18390	11839.9	11451.6	15297.8	11434	11434	16721.3
635.343	6424.17	6274.33	6274.17	6274.17	6349.33		631.404	6452.59	6302.62	6303.45	6303.22	6302.59	6379.12		626.555	18792.5	11890.1	11432.8	15762.3	11414.5	11414.5	17256.2
635.243	6437.93	6288.1	6287.93	6287.93	6363.1		631.304	6500.18	6350.22	6351.06	6350.83	6350.18	6426.74		626.455	18977.5	11956	11414.1	16215.7	11395	11395	17795.7
635.143	6423.27	6273.44	6273.27	6273.27	6348.44		631.204	6511.59	6361.63	6362.48	6362.25	6361.59	6438.18		626.355	19370	12041.2	11395.5	16642.6	11375.7	11375.7	18327.9
635.043	6423.2	6273.38	6273.2	6273.2	6348.38		631.104	6563.05	6413.08	6413.96	6413.72	6413.05	6489.67		626.255	20307.5	12152.7	11377.1	17029.5	11356.5	11356.5	18846.3
634.943	6452.1	6302.28	6302.1	6302.1	6377.28		631.004	6596.36	6446.41	6447.29	6447.04	6446.36	6523.01		626.155	21012.5	12296.1	11358.9	17365.3	11337.4	11337.4	19345.4
634.843	6425.37	6275.55	6275.37	6275.37	6350.55		630.904	6624.64	6474.68	6475.58	6475.33	6474.64	6551.32		626.055	21085	12481.7	11340.9	17641.6	11318.6	11318.6	19827.1
634.743	6450.77	6300.95	6300.77	6300.77	6375.95		630.804	6636.82	6486.87	6487.78	6487.53	6486.82	6563.54		625.955	21762.5	12722.2	11323.2	17852.2	11299.9	11299.9	20297.8
634.643	6449.5	6299.69	6299.5	6299.5	6374.69		630.704	6635.45	6485.5	6486.43	6486.18	6485.45	6562.21		625.855	22377.5	13031	11305.8	17992.8	11281.5	11281.5	20766.5
634.543	6431.6	6281.79	6281.6	6281.6	6356.79		630.604	6651.55	6501.6	6502.54	6502.29	6501.55	6578.34		625.755	22655	13433.1	11288.6	18060.1	11263.3	11263.3	21255.2
634.443	6455	6305.2	6305	6305	6380.2		630.504	6657.05	6507.1	6508.06	6507.81	6507.05	6583.88		625.655	23432.5	13946.9	11271.9	18051.8	11245.4	11245.4	21779.7
634.343	6459.97	6310.17	6309.97	6309.97	6385.17		630.404	6628.59	6478.65	6479.63	6479.37	6478.59	6555.47		625.555	24100	14602	11255.5	17966.4	11227.8	11227.8	22368.2
634.243	6456.37	6306.57	6306.37	6306.37	6381.57		630.304	6606.27	6456.34	6457.33	6457.07	6456.27	6533.2		625.455	24645	15425.1	11239.5	17803.6	11210.6	11210.6	23047
634.143	6479.67	6329.87	6329.67	6329.67	6404.87		630.204	6578.82	6428.89	6429.9	6429.64	6428.82	6505.79		625.355	25217.5	16428.6	11223.9	17565.5	11193.7	11193.7	23830.6
634.043	6475.4	6325.61	6325.4	6325.4	6400.61		630.104	6553.5	6403.58	6404.6	6404.34	6403.5	6480.52		625.255	26245	17622.2	11208.9	17257.3	11177.2	11177.2	24734
633.943	6492.77	6342.98	6342.77	6342.77	6417.98		630.004	6502.14	6352.22	6353.26	6352.99	6352.14	6429.2		625.155	27622.5	18965.1	11194.3	16888.8	11161.2	11161.2	25725.9
633.843	6488.9	6339.12	6338.9	6338.9	6414.12		629.904	6471.09	6321.18	6322.23	6321.97	6321.09	6398.2		625.055	28140	20394.9	11180.4	16474.1	11145.6	11145.6	26758.2
633.743	6498.23	6348.45	6348.23	6348.23	6423.45		629.804	6430	6280.1	6281.17	6280.9	6280	6357.17		624.955	28900	21815.4	11167.1	16031.5	11130.6	11130.6	27752.9
633.643	6469.97	6320.19	6319.97	6319.97	6395.19		629.704	6408.09	6258.2	6259.28	6259.01	6258.09	6335.32		624.855	29837.5	23142.2	11154.5	15580	11116.1	11116.1	28644.4
633.543	6494.63	6344.86	6344.63	6344.63	6419.86		629.604	6385.77	6235.89	6236.99	6236.72	6235.77	6313.06		624.755	31250	24295.1	11142.6	15134.2	11102.3	11102.3	29367.4
633.443	6488.7	6338.93	6338.7	6338.7	6413.93		629.504	6365.82	6215.95	6217.06	6216.79	6215.82	6293.17		624.655	31427.5	25228.3	11131.5	14706.3	11089.1	11089.1	29888
633.343	6507.43	6357.67	6357.43	6357.43	6432.67		629.404	6312.95	6163.1	6164.23	6163.95	6162.95	6240.37		624.555	31620	25900.8	11121.3	14305.5	11076.5	11076.5	30174.5
633.243	6501.7	6351.94	6351.7	6351.7	6426.94		629.304	6294.5	6144.66	6145.8	6145.52	6144.5	6221.98		624.455	31475	26285.7	11111.9	13937.3	11064.7	11064.7	30205.6
633.143	6491.97	6342.21	6341.97	6341.97	6417.21		629.204	6276.5	6126.67	6127.83	6127.55	6126.5	6204.05		624.355	31505	26377.8	11103.3	13604.5	11053.6	11053.5	29978.7
633.043	6499.63	6349.88	6349.63	6349.63	6424.88		629.104	6281.32	6131.51	6132.67	6132.4	6131.32	6208.94		624.255	31092.5	26151.1	11095.7	13307.2	11043.1	11043	29468
632.943	6491.73	6341.99	6341.73	6341.73	6416.99		629.004	6261.86	6112.07	6113.24	6112.97	6111.86	6189.56		624.155	30095	25619.7	11088.9	13044	11033.3	11033.2	28686.2
632.843	6551.4	6401.66	6401.4	6401.4	6476.66		628.904	6252.82	6103.05	6104.23	6103.96	6102.82	6180.61		624.055	29185	24795.1	11083	12812.1	11024.3	11024	27642.4
632.743	6530.9	6381.17	6380.9	6380.9	6456.17		628.804	6243.09	6093.35	6094.54	6094.26	6093.09	6170.97		623.955	28057.5	23720.1	11077.9	12608.7	11015.8	11015.4	26376.3
632.643	6542.9	6393.17	6392.9	6392.9	6468.17		628.704	6222.05	6072.34	6073.53	6073.25	6072.05	6150.03		623.855	26577.5	22478	11073.7	12430.4	11008	11007.4	24968
632.543	6537.27	6387.54	6387.27	6387.27	6462.54		628.604	6247.64	6097.96	6099.16	6098.88	6097.64	6175.73		623.755	25202.5	21161.6	11070.3	12274.2	11000.9	10999.8	23507.6
632.443	6531.2	6381.48	6381.2	6381.2	6456.48		628.504	6233	6083.37	6084.56	6084.28	6083	6161.2		623.655	23702.5	19859.3	11067.8	12137.3	10994.4	10992.7	22080.5
632.343	6557.73	6408.02	6407.73	6407.73	6483.02		628.404	6237.91	6088.32	6089.5	6089.23	6087.91	6166.23		623.555	22045	18633.6	11066	12017	10988.6	10986	20747.1
632.243	6600.93	6451.23	6450.93	6450.93	6526.23		628.304	6238.59	6089.06	6090.22	6089.95	6088.59	6167.05		623.455	20787.5	17529.3	11064.9	11911	10983.6	10979.6	19550
632.143	6588.73	6439.03	6438.73	6438.73	6514.03		628.204	6216.91	6067.45	6068.57	6068.31	6066.91	6145.51		623.355	19770	16560	11064.6	11817.3	10979.5	10973.4	18501.2
632.043	6629.77	6480.07	6479.77	6479.77	6555.07		628.104	6213.14	6063.75	6064.84	6064.58	6063.14	6141.9		623.255	19170	15733.4	11065.1	11734.3	10976.6	10967.5	17606.9
631.943	6678.3	6528.61	6528.3	6528.3	6603.61		628.004	6239.82	6090.53	6091.56	6091.31	6089.82	6168.76		623.155	18055	15033.5	11066.4	11660.5	10975.3	10961.7	16850.4
631.843	6713.83	6564.15	6563.83	6563.83	6639.15		627.904	6199.45	6050.28	6051.25	6050.99	6049.45	6128.61		623.055	17370	14446.4	11068.6	11594.6	10976	10956.2	16217.1
631.743	6745.63	6595.96	6595.63	6595.63	6670.96		627.804	6222.36	6061.87	6062.75	6062.5	6060.91	6140.31		622.955	17320	13957.1	11071.6	11535.7	10979.2	10950.7	15691.5
631.643	6756.17	6606.5	6606.17	6606.17	6681.5		627.704	6210.91	6062.57	6063.33	6063.08	6061.43	6141.11		622.855	16522.5	13546.3	11075.7	11482.6	10985.9	10945.4	15254.5
631.543	6819.4	6669.74	6669.4	6669.4	6744.74		627.604	6202.45	6063.32	6063.9	6063.66	6061.96	6141.96		622.755	16450	13203.4	11080.9	11434.8	10997	10940.2	14895.7
631.443	6891.83	6742.18	6741.83	6741.83	6817.18		627.504	6230.23	6064.12	6064.48	6064.24	6062.48	6142.87		622.655	16140	12914.3	11087.4	11391.4	11013.5	10935	14601.6
631.343	6961.43	6811.79	6811.43	6811.43	6886.79		627.404	6230.41	6065.01	6065.05	6064.82	6063.01	6143.87		622.555	16100	12669.7	11095.2	11352.1	11036.9	10930	14363.9
631.243	7021.23	6871.6	6871.23	6871.23	6946.6		627.304	6211.5	6066.01	6065.63	6065.41	6063.53	6144.99		622.455	15945	12462.3	11104.6	11316.2	11068.6	10925	14176.7
631.143	7078.93	6929.3	6928.93	6928.93	7004.3		627.204	6217.55	6067.19	6066.2	6066.01	6064.06	6146.28		622.355	15930	12284.5	11115.8	11283.3	11110.1	10920.1	14033.5
631.043	7137.17	6987.55	6987.17	6987.17	7062.55		627.104	6208.64	6068.62	6066.78	6066.6	6064.58	6147.84		622.255	15797.5	12132.3	11129	11253.2	11162.8	10915.3	13931.5
630.943	7180.33	7030.72	7030.33	7030.33	7105.72		627.004	6207.68	6070.41	6067.38	6067.2	6065.11	6149.78		622.155	15487.5	12000.5	11144.5	11225.5	11228.3	10910.5	13867.3
630.843	7231	7081.4	7081	7081	7156.4		626.904	6240.55	6072.72	6067.98	6067.81	6065.63	6152.25		622.055	15670	11885.9	11162.7	11199.9	11307.1	10905.8	13838
630.743	7226.07	7076.47	7076.07	7076.07	7151.47		626.804	6252.14	6075.81	6068.57	6068.42	6066.15	6155.49		621.955	15752.5	11786.1	11183.9	11176.3	11399.9	10901.2	13842.5
630.643	7188.03	7038.45	7038.03	7038.03	7113.45		626.704	6239.77	6080.01	6069.17	6069.03	6066.68	6159.86		621.855	15560	11698.2	11208.8	11154.3	11505.5	10896.7	13876.7
630.543	7166.2	7016.62	7016.2	7016.2	7091.62		626.604	6269.86	6085.81	6069.77	6069.65	6067.2	6165.83		621.755	15220	11620.9	11237.8	11133.9	11622.8	10892.2	13938.7
630.443	7161.47	7011.9	7011.47	7011.47	7086.9		626.504	6282.09	6093.88	6070.36	6070.28	6067.73	6174.06		621.655	15280	11552.3	11271.5	11114.9	11747.9	10887.8	14023.3
630.343	7087.93	6938.38	6937.93	6937.93	7013.38		626.404	6306.86	6105.06	6070.96	6070.91	6068.25	6185.42		621.555	15627.5	11491.2	11310.9	11097.1	11876.6	10883.4	14125.5
630.243	7035	6885.46	6885	6885	6960.46		626.304	6276.32	6120.43	6071.56	6071.55	6068.78	6200.98		621.455	15525	11436.6	11356.9	11080.5	12002.8	10879.1	14239.4
630.143	7007.13	6857.6	6857.13	6857.13	6932.6		626.204	6305.18	6141.3	6072.16	6072.2	6069.3	6222.06		621.355	15587.5	11387.6	11410.7	11064.8	12119.2	10874.9	14357.5
630.043	6933.13	6783.61	6783.13	6783.13	6858.61		626.104	6334.36	6169.12	6072.8	6072.86	6069.83	6250.12		621.255	15945	11343.5	11473.4	11050.2	12218.7	10870.8	14473.4
629.943	6847	6697.49	6697	6697	6772.49		626.004	6397.55	6205.44	6073.43	6073.52	6070.35	6286.69		621.155	15922.5	11303.6	11546.6	11036.4	12293.8	10866.7	14580.1
629.843	6772.27	6622.77	6622.27	6622.27	6697.77		625.904	6432.82	6251.72	6074.06	6074.2	6070.88	6333.22		621.055	16110	11267.4	11631.8	11023.4	12338.7	10862.8	14673
629.743	6715	6565.51	6565	6565	6640.51		625.804	6474.18	6309.11	6074.7	6074.88	6071.4	6390.89		620.955	16355	11234.6	11730.7	11011.1	12349.8	10858.9	14749.5
629.643	6647.13	6497.66	6497.13	6497.13	6572.66		625.704	6549.05	6378.24	6075.28	6075.58	6071.93	6460.24		620.855	16282.5	11204.5	11845.3	10999.6	12325.4	10855.2	14809.3
629.543	6617	6467.54	6467	6467	6542.54		625.604	6618.14	6458.9	6075.92	6076.29	6072.45	6541.21		620.755	16410	11177.1	11976.9	10988.7	12268	10851.5	14856.2
629.443	6587.8	6438.36	6437.8	6437.8	6513.36		625.504	6698.91	6549.85	6076.56	6077.02	6072.97	6632.48		620.655	16385	11152	12127	10978.4	12180.6	10848	14894
629.343	6567.2	6417.77	6417.2	6417.2	6492.77		625.404	6780.55	6648.65	6077.21	6077.76	6073.5	6731.62		620.555	16700	11128.8	12295.9	10968.7	12070.7	10844.6	14930.4
629.243	6532.4	6382.99	6382.4	6382.4	6457.99		625.304	6890.91	6751.63	6077.87	6078.52	6074.02	6834.98		620.455	16577.5	11107.6	12483.2	10959.5	11944.4	10841.3	14970.8
629.143	6485.5	6336.1	6335.5	6335.5	6411.1		625.204	6997.45	6854.1	6078.53	6079.31	6074.55	6937.85		620.355	16592.5	11088	12686.7	10950.8	11810	10838.1	15021.1
629.043	6503.63	6354.25	6353.63	6353.63	6429.25		625.104	7106.77	6950.66	6079.21	6080.11	6075.07	7034.84		620.255	16712.5	11069.9	12902.4	10942.6	11674.1	10835.1	15083.8
628.943	6511.27	6361.9	6361.27	6361.27	6436.9		625.004	7198.18	7035.7	6079.89	6080.95	6075.6	7120.34		620.155	16600	11053.1	13124.8	10934.8	11542.5	10832.1	15158.8
628.843	6477.2	6327.85	6327.2	6327.2	6402.85		624.904	7237.5	7104	6080.58	6081.81	6076.12	7189.14		620.055	16512.5	11037.5	13346.6	10927.5	11419.9	10829.3	15243.4
628.743	6412.83	6263.5	6262.83	6262.83	6338.5		624.804	7328.27	7151.28	6081.27	6082.71	6076.65	7236.97		619.955	16925	11023.1	13558.9	10920.5	11308.8	10826.7	15331.3
628.643	6439.67	6290.36	6289.67	6289.67	6365.36		624.704	7344.59	7174.77	6081.98	6083.64	6077.17	7261.05		619.855	16895	11009.7	13752	10914	11211.2	10824.2	15414.4
628.543	6428.6	6279.31	6278.6	6278.6	6354.31		624.604	7329.55	7173.43	6082.7	6084.63	6077.7	7260.36		619.755	17017.5	10997.3	13916.7	10907.8	11127.4	10821.8	15483.8
628.443	6402.43	6253.16	6252.43	6252.43	6328.16		624.504	7346.05	7148.11	6083.43	6085.66	6078.22	7235.76		619.655	16707.5	10985.8	14047.2	10902	11057.1	10819.5	15533.4
628.343	6436.93	6287.68	6286.93	6286.93	6362.68		624.404	7272.36	7101.36	6084.18	6086.74	6078.74	7189.8		619.555	16885	10975	14140	10896.5	10999.3	10817.4	15558.5
628.243	6438.8	6289.57	6288.8	6288.8	6364.57		624.304	7212.23	7037.07	6084.94	6087.9	6079.27	7126.37		619.455	17102.5	10965	14193.5	10891.3	10952.5	10815.5	15556
628.143	6418.73	6269.53	6268.73	6268.73	6344.53		624.204	7132.05	6959.98	6085.71	6089.13	6079.79	7050.23		619.355	17145	10955.7	14207.5	10886.5	10915.6	10813.6	15524.4
628.043	6407.77	6258.59	6257.77	6257.77	6333.59		624.104	7043.91	6875.09	6086.5	6090.45	6080.32	6966.41		619.255	16965	10947.1	14182.6	10882	10886.6	10812	15462.2
627.943	6432.43	6283.28	6282.43	6282.43	6358.28		624.004	6940.77	6787.23	6087.31	6091.87	6080.84	6879.72		619.155	16905	10939	14119.7	10877.8	10864.4	10810.5	15369.5
627.843	6412.53	6263.41	6262.53	6262.53	6338.41		623.904	6865.14	6700.57	6088.14	6093.4	6081.37	6794.37		619.055	16897.5	10931.6	14020.2	10873.9	10847.4	10809.1	15245.7
627.743	6392.17	6243.07	6242.17	6242.17	6318.07		623.804	6800.82	6618.42	6088.99	6095.06	6081.89	6713.68		618.955	16617.5	10924.7	13885.8	10870.2	10834.8	10807.9	15091.9
627.643	6371.07	6222	6221.07	6221.07	6297		623.704	6686.14	6543.08	6089.86	6096.87	6082.42	6639.97		618.855	16377.5	10918.2	13719.2	10866.8	10825.4	10806.8	14909.3
627.543	6383.27	6234.22	6233.27	6233.27	6309.22		623.604	6591.86	6475.92	6090.76	6098.84	6082.94	6574.64		618.755	16305	10912.3	13523.8	10863.7	10818.6	10805.8	14700.9
627.443	6416.3	6267.28	6266.3	6266.3	6342.28		623.504	6584.59	6417.45	6091.69	6101	6083.47	6518.2		618.655	15690	10906.7	13304.8	10860.8	10813.5	10805	14470.9
627.343	6409.7	6260.72	6259.7	6259.7	6335.72		623.404	6540.55	6367.55	6092.64	6103.36	6083.99	6470.57		618.555	15727.5	10901.6	13068.5	10858	10809.9	10804.2	14225.4
627.243	6447.53	6298.59	6297.53	6297.53	6373.59		623.304	6507.91	6325.61	6093.64	6105.96	6084.52	6431.18		618.455	15605	10896.8	12822.6	10855.5	10807.3	10803.6	13971.5
627.143	6442.53	6293.63	6292.53	6292.53	6368.63		623.204	6462.14	6290.8	6094.67	6108.81	6085.04	6399.2		618.355	15365	10892.3	12575.9	10853.1	10805.4	10803	13717.7
627.043	6411.87	6263	6261.87	6261.87	6338		623.104	6460.82	6262.13	6095.75	6111.93	6085.56	6373.68		618.255	15187.5	10888.1	12338	10851	10804.1	10802.5	13473.5
626.943	6428.53	6279.71	6278.53	6278.53	6354.71		623.004	6455.23	6238.64	6096.87	6115.34	6086.09	6353.67		618.155	14937.5	10884.2	12116.8	10848.9	10803.1	10802.1	13246.7
626.843	6413.23	6264.45	6263.23	6263.23	6339.45		622.904	6431.23	6219.41	6098.05	6119.05	6086.61	6338.28		618.055	14417.5	10880.6	11917.7	10847	10802.4	10801.8	13042.4
626.743	6429.97	6281.22	6279.97	6279.97	6356.22		622.804	6421.59	6203.65	6099.29	6123.09	6087.14	6326.75		617.955	14225	10877.2	11743	10845.3	10801.9	10801.5	12862.8
626.643	6434.37	6285.66	6284.37	6284.37	6360.66		622.704	6430.68	6190.69	6100.59	6127.45	6087.66	6318.4		617.855	14102.5	10874	11592.6	10843.6	10801.5	10801.2	12707.9
626.543	6407.73	6259.07	6257.73	6257.73	6334.07		622.604	6412.05	6179.96	6101.98	6132.13	6088.19	6312.7		617.755	13985	10871	11465.1	10842	10801.2	10801	12576.2
626.443	6432.33	6283.73	6282.33	6282.33	6358.73		622.504	6391.95	6171.03	6103.46	6137.13	6088.71	6309.19		617.655	13917.5	10868.2	11358.2	10840.5	10800.9	10800.8	12465.3
626.343	6438.03	6289.49	6288.03	6288.03	6364.49		622.404	6380.59	6163.54	6105.03	6142.43	6089.24	6307.53		617.555	13712.5	10865.5	11269.2	10839.1	10800.7	10800.7	12372.6
626.243	6422.07	6273.58	6272.07	6272.07	6348.58		622.304	6384.55	6157.22	6106.73	6147.99	6089.76	6307.42		617.455	13730	10862.9	11195.4	10837.8	10800.5	10800.5	12295.2
626.143	6402.27	6253.84	6252.27	6252.27	6328.84		622.204	6386.64	6151.85	6108.56	6153.77	6090.29	6308.6		617.355	13590	10860.5	11134.3	10836.5	10800.4	10800.4	12230.7
626.043	6401.63	6253.26	6251.63	6251.63	6328.26		622.104	6385.5	6147.25	6110.56	6159.71	6090.81	6310.89		617.255	13417.5	10858.3	11083.7	10835.3	10800.3	10800.2	12176.8
625.943	6453.67	6305.36	6303.67	6303.67	6380.36		622.004	6374.41	6143.29	6112.74	6165.75	6091.33	6314.11		617.155	13560	10856.1	11041.8	10834.1	10800.1	10800.1	12131.8
625.843	6441.07	6292.82	6291.07	6291.07	6367.82		621.904	6366.5	6139.87	6115.14	6171.8	6091.86	6318.1		617.055	13550	10854.1	11006.9	10833	10800	10800	12093.9
625.743	6406.1	6257.91	6256.1	6256.1	6332.91		621.804	6376.55	6136.9	6117.81	6177.79	6092.38	6322.73		616.955	13677.5	10852.1	10977.8	10832	10799.9	10799.9	12062
625.643	6433.27	6285.17	6283.27	6283.27	6360.17		621.704	6383.82	6134.31	6120.8	6183.59	6092.91	6327.89		616.855	13285	10850.3	10953.4	10831	10799.8	10799.8	12035
625.543	6416.43	6268.43	6266.43	6266.43	6343.44		621.604	6391.45	6132.04	6124.18	6189.12	6093.43	6333.48		616.755	13292.5	10848.5	10933	10830	10799.7	10799.7	12012
625.443	6417.53	6269.63	6267.53	6267.53	6344.63		621.504	6372.14	6130.06	6128.04	6194.26	6093.96	6339.43		616.655	13465	10846.8	10915.7	10829.1	10799.7	10799.7	11992.3
625.343	6425.27	6277.46	6275.27	6275.27	6352.46		621.404	6412.09	6128.32	6132.46	6198.89	6094.48	6345.71		616.555	13532.5	10845.2	10901.1	10828.2	10799.6	10799.6	11975.3
625.243	6436	6288.24	6286	6286	6363.24		621.304	6425.18	6126.79	6137.6	6202.93	6095.01	6352.31		616.455	13535	10843.6	10888.7	10827.3	10799.5	10799.5	11960.6
625.143	6419.77	6272.11	6269.77	6269.77	6347.11		621.204	6437.95	6125.44	6143.61	6206.28	6095.53	6359.28		616.355	13555	10842.2	10878	10826.5	10799.5	10799.5	11947.8
625.043	6421.6	6273.53	6271.08	6271.08	6348.54		621.104	6449.18	6124.26	6150.69	6208.86	6096.06	6366.7		616.255	13670	10840.8	10868.9	10825.7	10799.4	10799.4	11936.6
624.943	6421.87	6274.77	6272.21	6272.2	6349.78		621.004	6460.45	6123.23	6159.09	6210.59	6096.58	6374.75		616.155	13390	10839.5	10861.1	10825	10799.4	10799.4	11926.8
624.843	6443.47	6276.01	6273.34	6273.32	6351.03		620.904	6472.36	6122.32	6169.07	6211.45	6097.1	6383.63		616.055	13165	10838.2	10854.3	10824.3	10799.3	10799.3	11918.1
624.743	6423.63	6277.27	6274.47	6274.44	6352.3		620.804	6502.27	6121.53	6180.97	6211.4	6097.63	6393.64		615.955	13307.5	10837	10848.5	10823.6	10799.3	10799.3	11910.4
624.643	6441.5	6278.53	6275.61	6275.57	6353.58		620.704	6518.18	6120.84	6195.15	6210.43	6098.15	6405.11		615.855	13427.5	10835.9	10843.3	10822.9	10799.3	10799.3	11903.5
624.543	6442.13	6279.81	6276.75	6276.69	6354.87		620.604	6501.36	6120.24	6211.96	6208.58	6098.68	6418.42		615.755	13410	10834.7	10838.8	10822.3	10799.3	10799.3	11897.4
624.443	6443.07	6281.09	6277.9	6277.81	6356.19		620.504	6512.64	6119.72	6231.81	6205.89	6099.2	6434.02		615.655	13272.5	10833.7	10834.9	10821.7	10799.2	10799.2	11891.8
624.343	6445.17	6282.39	6279.07	6278.93	6357.53		620.404	6515.64	6119.28	6254.98	6202.44	6099.73	6452.25		615.555	13422.5	10832.7	10831.5	10821.1	10799.2	10799.2	11886.8
624.243	6451.03	6283.7	6280.26	6280.05	6358.91		620.304	6530.86	6118.91	6281.72	6198.32	6100.25	6473.45		615.455	13070	10831.7	10828.4	10820.6	10799.2	10799.2	11882.2
624.143	6441.9	6285.03	6281.48	6281.18	6360.33		620.204	6570.64	6118.6	6312.16	6193.61	6100.78	6497.82		615.355	13412.5	10830.8	10825.7	10820	10799.2	10799.2	11878.1
624.043	6449	6286.37	6282.73	6282.3	6361.8		620.104	6585.82	6118.34	6346.15	6188.44	6101.3	6525.33		615.255	13372.5	10829.9	10823.3	10819.5	10799.2	10799.2	11874.3
623.943	6462.93	6287.73	6284.03	6283.42	6363.35		620.004	6646.55	6118.13	6383.38	6182.92	6101.83	6555.78		615.155	13242.5	10829	10821.2	10819	10799.2	10799.2	11870.8
623.843	6439.57	6289.11	6285.4	6284.54	6364.97		619.904	6674.95	6117.98	6423.16	6177.18	6102.35	6588.61		615.055	13295	10828.2	10819.3	10818.5	10799.2	10799.2	11867.6
623.743	6453.17	6290.52	6286.86	6285.66	6366.71		619.804	6682.05	6117.86	6464.51	6171.33	6102.88	6622.95		614.955	13470	10827.4	10817.6	10818	10799.2	10799.2	11864.7
623.643	6436.63	6291.95	6288.43	6286.79	6368.59		619.704	6720.36	6117.78	6506.13	6165.49	6103.4	6657.6		614.855	13112.5	10826.6	10816.1	10817.6	10799.2	10799.2	11862
623.543	6431.67	6293.4	6290.13	6287.91	6370.63		619.604	6761.64	6117.74	6546.45	6159.76	6103.92	6691.1		614.755	13315	10841.7	10830.6	10833	10815	10815	11875.3
623.443	6412.1	6294.89	6292.01	6289.03	6372.87		619.504	6794.27	6117.73	6583.66	6154.24	6104.45	6721.73		614.655	13277.5	10803.5	10791.8	10795.1	10777.5	10777.5	11835.4
623.343	6441.1	6296.41	6294.11	6290.15	6375.37		619.404	6808	6117.75	6615.91	6148.99	6104.97	6747.71		614.555	13392.5	10917.9	10905.7	10909.7	10892.5	10892.5	11948.3
623.243	6461.07	6297.98	6296.46	6291.27	6378.16		619.304	6854.36	6117.8	6641.48	6144.09	6105.5	6767.37		614.455	13270	10794.7	10782.2	10786.8	10770	10770	11823.7
623.143	6433.23	6299.59	6299.11	6292.4	6381.3		619.204	6866.05	6117.88	6658.65	6139.57	6106.02	6779.05		614.355	13275	10799.1	10786.3	10791.4	10775	10775	11826.8
623.043	6442.27	6301.24	6302.1	6293.52	6384.83		619.104	6850.05	6117.98	6666.4	6135.47	6106.55	6781.75		614.255	13212.5	10736	10723	10728.5	10712.5	10712.5	11762.5
622.943	6460.37	6302.96	6305.48	6294.64	6388.81		619.004	6843.86	6118.1	6664.01	6131.8	6107.07	6774.77		614.155	13267.5	10790.4	10777.2	10783.2	10767.5	10767.5	11815.8
622.843	6466.4	6304.75	6309.29	6295.76	6393.28		618.904	6861.41	6118.25	6651.36	6128.57	6107.6	6757.98		614.055	13480	11002.3	10989	10995.3	10980	10980	12026.7
622.743	6476.87	6306.61	6313.53	6296.88	6398.26		618.804	6828.14	6118.41	6629.09	6125.77	6108.12	6732.03		613.955	13517.5	11039.3	11025.9	11032.5	11017.5	11017.5	12062.7
622.643	6464.57	6308.57	6318.22	6298.01	6403.78		618.704	6769.64	6118.73	6598.18	6123.39	6108.65	6698		613.855	13370	10891.2	10877.9	10884.7	10870	10870	11913.8
622.543	6485	6310.63	6323.32	6299.13	6409.82		618.604	6719.73	6118.9	6560.31	6121.38	6109.17	6657.25		613.755	13337.5	10858.2	10844.8	10851.9	10837.5	10837.5	11879.9
622.443	6486.07	6312.81	6328.79	6300.25	6416.35		618.504	6684.36	6119.07	6517.37	6119.74	6109.69	6611.79		613.655	13347.5	10867.7	10854.3	10861.6	10847.5	10847.5	11888.6
622.343	6511.2	6315.14	6334.53	6301.37	6423.29		618.404	6612.14	6119.24	6471.38	6118.42	6110.22	6563.61		613.555	13272.5	10792.2	10778.9	10786.3	10772.5	10772.5	11812.4
622.243	6528.97	6317.65	6340.4	6302.49	6430.55		618.304	6581.77	6119.51	6424.44	6117.4	6110.74	6514.86		613.455	13382.5	10901.8	10888.5	10896	10882.5	10882.5	11921.3
622.143	6529.5	6320.37	6346.25	6303.62	6438		618.204	6547.68	6119.8	6378.4	6116.63	6111.27	6467.29		613.355	13467.5	10986.3	10973.1	10980.7	10967.5	10967.5	12005.2
622.043	6509.67	6323.34	6351.85	6304.74	6445.46		618.104	6494.82	6120.08	6334.84	6116.09	6111.79	6422.42		613.255	13325	10843.4	10830.3	10837.9	10825	10825	11861.6
621.943	6530.6	6326.63	6357.01	6305.86	6452.79		618.004	6452.18	6120.37	6294.91	6115.74	6112.32	6381.39		613.155	13460	10978	10965	10972.7	10960	10960	11995.6
621.843	6546.37	6330.32	6361.51	6306.98	6459.85		617.904	6432.09	6120.65	6259.51	6115.55	6112.84	6345.03		613.055	13480	10997.6	10984.7	10992.4	10980	10980	12014.6
621.743	6535.43	6334.49	6365.16	6308.1	6466.55		617.804	6389.18	6120.94	6228.93	6115.51	6113.37	6313.64		612.955	13335	10852.2	10839.4	10847.2	10835	10835	11868.7
621.643	6548.27	6339.3	6367.75	6309.23	6472.83		617.704	6358.73	6121.22	6203.27	6115.57	6113.89	6287.28		612.855	13407.5	10924.6	10911.6	10919.4	10907.5	10907.5	11940.7
621.543	6551.13	6344.91	6369.23	6310.35	6478.79		617.604	6349.45	6121.51	6182.32	6115.73	6114.42	6265.73		612.755	13247.5	10764.3	10751.4	10759.2	10747.5	10747.5	11779.8
621.443	6543.07	6351.57	6369.57	6311.47	6484.67		617.504	6315.55	6121.86	6165.61	6115.97	6114.94	6248.56		612.655	13080	10596.4	10583.7	10591.4	10580	10580	11611.5
621.343	6561.5	6359.56	6368.83	6312.59	6490.8		617.404	6320.91	6122.21	6152.68	6116.27	6115.47	6235.23		612.555	13277.5	10793.5	10781	10788.7	10777.5	10777.5	11808.2
621.243	6573	6369.31	6367.11	6313.72	6497.7		617.304	6317.23	6122.57	6142.9	6116.62	6115.99	6225.1		612.455	13267.5	10783.1	10770.8	10778.5	10767.5	10767.5	11797.4
621.143	6575.87	6381.33	6364.58	6314.84	6506.07		617.204	6298.64	6122.92	6135.69	6117	6116.51	6217.58		612.355	13197.5	10712.7	10700.6	10708.3	10697.5	10697.5	11726.6
621.043	6584.03	6396.29	6361.47	6315.96	6516.8		617.104	6285.68	6123.27	6130.54	6117.42	6117.04	6212.16		612.255	13295	10809.8	10798	10805.6	10795	10795	11823.4
620.943	6607.17	6415	6357.99	6317.08	6530.91		617.004	6265.05	6123.63	6126.96	6117.86	6117.56	6208.33		612.155	13197.5	10711.9	10700.3	10707.9	10697.5	10697.5	11725.1
620.843	6635.47	6438.41	6354.36	6318.2	6549.57		616.904	6304.95	6123.98	6124.59	6118.32	6118.09	6205.72		612.055	13277.5	10791.7	10780.2	10787.7	10777.5	10777.5	11804.5
620.743	6637.13	6467.63	6350.77	6319.33	6574.07		616.804	6291.5	6124.34	6123.08	6118.8	6118.61	6203.99		611.955	13340	10853.9	10842.5	10850	10840	10840	11866.4
620.643	6679.7	6503.83	6347.36	6320.45	6605.74		616.704	6293.68	6124.73	6122.2	6119.29	6119.14	6202.94		611.855	13310	10823.7	10812.4	10819.8	10810	10810	11835.9
620.543	6733.7	6548.17	6344.26	6321.57	6645.86		616.604	6292.14	6125.13	6121.77	6119.78	6119.66	6202.36		611.755	13177.5	10690.9	10679.8	10687.1	10677.5	10677.5	11702.8
620.443	6804.63	6601.68	6341.54	6322.69	6695.53		616.504	6266.5	6125.53	6121.64	6120.28	6120.19	6202.08		611.655	13642.5	11155.7	11144.7	11152	11142.5	11142.5	12167.3
620.343	6826.8	6665.05	6339.27	6323.81	6755.5		616.404	6279.18	6125.93	6121.72	6120.79	6120.71	6202.02		611.555	13292.5	10805.4	10794.6	10801.8	10792.5	10792.5	11816.8
620.243	6920.7	6738.47	6337.43	6324.94	6825.96		616.304	6290.18	6126.33	6121.95	6121.3	6121.24	6202.11		611.455	13390	10902.7	10892	10899.1	10890	10890	11913.8
620.143	6974.97	6821.39	6336.03	6326.06	6906.36		616.204	6288.41	6126.73	6122.27	6121.81	6121.76	6202.29		611.355	13435	10947.4	10936.9	10944	10935	10935	11958.3
620.043	7072.47	6912.31	6335.03	6327.18	6995.17		616.104	6274.55	6127.13	6122.66	6122.33	6122.28	6202.55
619.943	7141.87	7008.71	6334.42	6328.3	7089.83		616.004	6252.09	6127.53	6123.09	6122.85	6122.81	6202.85
619.843	7228.53	7107.04	6334.13	6329.42	7186.75		615.904	6279.36	6127.95	6123.55	6123.37	6123.33	6203.2
619.743	7329.57	7202.88	6334.12	6330.55	7281.45		615.804	6277.09	6128.38	6124.03	6123.89	6123.86	6203.58
619.643	7480.27	7291.19	6334.35	6331.67	7368.87		615.704	6272.09	6128.81	6124.52	6124.41	6124.38	6203.97
619.543	7529.37	7366.79	6334.78	6332.79	7443.77		615.604	6266.55	6129.24	6125.02	6124.93	6124.91	6204.37
619.443	7569.9	7424.82	6335.37	6333.91	7501.28		615.504	6292.95	6129.67	6125.52	6125.45	6125.43	6204.78
619.343	7623.47	7461.31	6336.09	6335.03	7537.37		615.404	6286.73	6130.1	6126.03	6125.97	6125.96	6205.19
619.243	7616.47	7473.65	6336.92	6336.16	7549.41		615.304	6289.05	6130.53	6126.54	6126.5	6126.48	6205.61
619.143	7625.03	7460.83	6337.82	6337.28	7536.37		615.204	6293.86	6130.96	6127.06	6127.02	6127.01	6206.03
619.043	7594.03	7423.7	6338.78	6338.4	7499.08		615.104	6278	6131.41	6127.58	6127.54	6127.53	6206.47
618.943	7497.33	7364.89	6339.78	6339.52	7440.16		615.004	6285.82	6131.86	6128.09	6128.07	6128.05	6206.91
618.843	7435.73	7288.38	6340.82	6340.64	7363.56		614.904	6288.77	6132.31	6128.61	6128.59	6128.58	6207.36
618.743	7338	7199.06	6341.89	6341.77	7274.18		614.804	6265.05	6132.76	6129.13	6129.11	6129.1	6207.8
618.643	7256.77	7102.24	6342.97	6342.89	7177.32		614.704	6284.68	6133.21	6129.65	6129.64	6129.63	6208.25
618.543	7137.2	7003.11	6344.06	6344.01	7078.16		614.604	6280.82	6133.67	6130.18	6130.16	6130.15	6208.69
618.443	7042.2	6906.25	6345.17	6345.13	6981.28		614.504	6281.27	6134.12	6130.7	6130.68	6130.68	6209.14
618.343	6986.03	6815.35	6346.28	6346.25	6890.37		614.404	6285.86	6134.57	6131.22	6131.21	6131.2	6209.59
618.243	6915.6	6733.03	6347.39	6347.38	6808.05		614.304	6291.18	6135.03	6131.74	6131.73	6131.73	6210.05
618.143	6817.6	6660.85	6348.51	6348.5	6735.86		614.204	6288.73	6135.5	6132.26	6132.26	6132.25	6210.52
618.043	6739.17	6599.4	6349.63	6349.62	6674.41		614.104	6271.86	6135.97	6132.79	6132.78	6132.78	6210.98
617.943	6695.47	6548.43	6350.75	6350.74	6623.43		614.004	6285.91	6136.43	6133.31	6133.3	6133.3	6211.45
617.843	6637.87	6507.14	6351.87	6351.86	6582.14		613.904	6263.64	6136.9	6133.83	6133.83	6133.83	6211.91
617.743	6618.2	6474.4	6352.99	6352.99	6549.4		613.804	6301.27	6137.36	6134.36	6134.35	6134.35	6212.38
617.643	6589.13	6448.93	6354.11	6354.11	6523.93		613.704	6298.32	6137.83	6134.88	6134.88	6134.87	6212.84
617.543	6602.9	6429.44	6355.23	6355.23	6504.44		613.604	6316.18	6138.3	6135.41	6135.4	6135.4	6213.31
617.443	6569.8	6414.73	6356.35	6356.35	6489.73		613.504	6319.73	6138.77	6135.93	6135.93	6135.92	6213.78
617.343	6530.73	6403.78	6357.47	6357.47	6478.78		613.404	6284.95	6139.25	6136.45	6136.45	6136.45	6214.26
617.243	6535.03	6395.7	6358.6	6358.6	6470.7		613.304	6289.68	6139.73	6136.98	6136.98	6136.97	6214.74
617.143	6534.6	6389.8	6359.72	6359.72	6464.8		613.204	6285.14	6140.21	6137.5	6137.5	6137.5	6215.21
617.043	6557.03	6385.53	6360.84	6360.84	6460.53		613.104	6298.95	6140.68	6138.03	6138.02	6138.02	6215.69
616.943	6559.93	6382.49	6361.96	6361.96	6457.49		613.004	6290.32	6141.16	6138.55	6138.55	6138.55	6216.17
616.843	6549.83	6380.35	6363.08	6363.08	6455.35		612.904	6287.41	6141.64	6139.07	6139.07	6139.07	6216.64
616.743	6538.3	6378.9	6364.21	6364.21	6453.9		612.804	6291.64	6142.12	6139.6	6139.6	6139.6	6217.12
616.643	6541.2	6377.96	6365.33	6365.33	6452.96		612.704	6294.95	6142.6	6140.12	6140.12	6140.12	6217.61
616.543	6549.97	6377.41	6366.45	6366.45	6452.41		612.604	6275.41	6143.09	6140.65	6140.65	6140.64	6218.09
616.443	6516.43	6377.16	6367.57	6367.57	6452.16		612.504	6302.09	6143.58	6141.17	6141.17	6141.17	6218.58
616.343	6534.1	6377.14	6368.7	6368.7	6452.14		612.404	6307.91	6144.06	6141.7	6141.7	6141.69	6219.07
616.243	6509.17	6377.3	6369.82	6369.82	6452.3		612.304	6285.91	6144.55	6142.22	6142.22	6142.22	6219.55
616.143	6525.93	6377.61	6370.94	6370.94	6452.61		612.204	6288.05	6145.03	6142.75	6142.74	6142.74	6220.04
616.043	6518.17	6378.04	6372.06	6372.06	6453.04		612.104	6314.64	6145.52	6143.27	6143.27	6143.27	6220.52
615.943	6531.53	6378.56	6373.18	6373.18	6453.56		612.004	6299.41	6146.01	6143.79	6143.79	6143.79	6221.01
615.843	6512	6379.17	6374.31	6374.31	6454.17		611.904	6297.18	6146.5	6144.32	6144.32	6144.32	6221.5
615.743	6552.03	6379.84	6375.43	6375.43	6454.84		611.804	6305.82	6146.99	6144.84	6144.84	6144.84	6221.99
615.643	6531.77	6380.56	6376.55	6376.55	6455.56		611.704	6322.91	6147.48	6145.37	6145.37	6145.37	6222.49
615.543	6538.83	6381.34	6377.67	6377.67	6456.34		611.604	6306.59	6147.98	6145.89	6145.89	6145.89	6222.98
615.443	6546.67	6382.15	6378.79	6378.79	6457.15		611.504	6315.41	6148.47	6146.42	6146.42	6146.42	6223.47
615.343	6529.57	6383	6379.92	6379.92	6458		611.404	6313.32	6148.96	6146.94	6146.94	6146.94	6223.96
615.243	6551.4	6383.88	6381.04	6381.04	6458.88		611.304	6297.41	6149.46	6147.47	6147.46	6147.46	6224.46
615.143	6543	6384.78	6382.16	6382.16	6459.78		611.204	6310.27	6149.95	6147.99	6147.99	6147.99	6224.95
615.043	6545.3	6385.71	6383.28	6383.28	6460.71		611.104	6310.68	6150.45	6148.51	6148.51	6148.51	6225.45
614.943	6537.83	6386.65	6384.4	6384.4	6461.65		611.004	6325.86	6150.94	6149.04	6149.04	6149.04	6225.95
614.843	6535.6	6387.61	6385.53	6385.53	6462.61		610.904	6321.32	6151.44	6149.56	6149.56	6149.56	6226.44
614.743	6542.1	6388.59	6386.65	6386.65	6463.59		610.804	6294.59	6151.94	6150.09	6150.09	6150.09	6226.94
614.643	6527.27	6389.58	6387.77	6387.77	6464.58		610.704	6295.68	6152.44	6150.61	6150.61	6150.61	6227.44
614.543	6507.23	6390.58	6388.89	6388.89	6465.58		610.604	6308.36	6152.94	6151.14	6151.14	6151.14	6227.94
614.443	6537.33	6391.6	6390.01	6390.01	6466.6		610.504	6299.36	6151.14	6149.36	6149.36	6149.36	6226.14
614.343	6567.8	6392.62	6391.14	6391.14	6467.62		610.404	6298.68	6150.43	6148.68	6148.68	6148.68	6225.43
614.243	6560.67	6393.65	6392.26	6392.26	6468.65		610.304	6306.77	6158.5	6156.77	6156.77	6156.77	6233.5
614.143	6562.57	6394.69	6393.38	6393.38	6469.69		610.204	6331.09	6182.79	6181.09	6181.09	6181.09	6257.79
614.043	6557.7	6395.73	6394.5	6394.5	6470.73		610.104	6330.18	6181.86	6180.18	6180.18	6180.18	6256.86
613.943	6568.2	6396.78	6395.62	6395.62	6471.78		610.004	6323.18	6174.84	6173.18	6173.18	6173.18	6249.84
613.843	6553.33	6397.84	6396.75	6396.75	6472.84		609.904	6327.77	6179.41	6177.77	6177.77	6177.77	6254.41
613.743	6569.67	6398.9	6397.87	6397.87	6473.9		609.804	6315.45	6167.07	6165.45	6165.45	6165.45	6242.07
613.643	6585.93	6399.97	6398.99	6398.99	6474.97		609.704	6324.59	6176.18	6174.59	6174.59	6174.59	6251.18
613.543	6576.77	6401.03	6400.11	6400.11	6476.03		609.604	6320.32	6171.89	6170.32	6170.32	6170.32	6246.89
613.443	6574.83	6402.11	6401.23	6401.23	6477.11		609.504	6312.73	6164.28	6162.73	6162.73	6162.73	6239.28
613.343	6568.13	6403.18	6402.36	6402.36	6478.18		609.404	6319.36	6170.89	6169.36	6169.36	6169.36	6245.89
613.243	6563.27	6404.26	6403.48	6403.48	6479.26		609.304	6313.09	6164.6	6163.09	6163.09	6163.09	6239.6
613.143	6558.73	6405.35	6404.6	6404.6	6480.35		609.204	6298.23	6149.72	6148.23	6148.23	6148.23	6224.72
613.043	6552	6406.45	6405.72	6405.72	6481.45		609.104	6350.36	6201.83	6200.36	6200.36	6200.36	6276.84
612.943	6556.43	6407.13	6406.43	6406.43	6482.13		609.004	6337	6188.45	6187	6187	6187	6263.45
612.843	6541.33	6391.99	6391.33	6391.33	6466.99		608.904	6338.41	6189.84	6188.41	6188.41	6188.41	6264.84
612.743	6571.33	6421.95	6421.33	6421.33	6496.95		608.804	6328.59	6180	6178.59	6178.59	6178.59	6255.01
612.643	6557.53	6408.12	6407.53	6407.53	6483.12		608.704	6320.73	6172.12	6170.73	6170.73	6170.73	6247.12
612.543	6570.9	6421.47	6420.9	6420.9	6496.47		608.604	6325.27	6176.65	6175.27	6175.27	6175.27	6251.65
612.443	6546.97	6397.51	6396.97	6396.97	6472.51		608.504	6314.64	6166	6164.64	6164.64	6164.64	6241
612.343	6552.53	6403.05	6402.53	6402.53	6478.05		608.404	6311.05	6162.39	6161.05	6161.05	6161.05	6237.39
612.243	6576.43	6426.93	6426.43	6426.43	6501.93		608.304	6316.45	6167.79	6166.45	6166.45	6166.45	6242.79
612.143	6596.87	6447.34	6446.87	6446.87	6522.34		608.204	6310.23	6161.54	6160.23	6160.23	6160.23	6236.54
612.043	6615.23	6465.69	6465.23	6465.23	6540.69
611.943	6577.2	6427.63	6427.2	6427.2	6502.63
611.843	6580.3	6430.71	6430.3	6430.3	6505.71
611.743	6570.57	6420.97	6420.57	6420.57	6495.97
611.643	6593.87	6444.25	6443.87	6443.87	6519.25
611.543	6568.7	6419.07	6418.7	6418.7	6494.07
611.443	6580.73	6431.09	6430.73	6430.73	6506.09
611.343	6598.9	6449.24	6448.9	6448.9	6524.24
611.243	6587.57	6437.9	6437.57	6437.57	6512.9
611.143	6562.67	6412.98	6412.67	6412.67	6487.98
611.043	6562.5	6412.8	6412.5	6412.5	6487.8
610.943	6574.1	6424.39	6424.1	6424.1	6499.39
610.843	6591.27	6441.55	6441.27	6441.27	6516.55
610.743	6585.2	6435.47	6435.2	6435.2	6510.47
610.643	6597.37	6447.63	6447.37	6447.37	6522.63
610.543	6599.2	6449.45	6449.2	6449.2	6524.45
610.443	6597.57	6447.81	6447.57	6447.57	6522.81
610.343	6618.73	6468.97	6468.73	6468.73	6543.97
610.243	6615.87	6466.09	6465.87	6465.87	6541.09
610.143	6622.3	6472.52	6472.3	6472.3	6547.52
610.043	6616.97	6467.18	6466.97	6466.97	6542.18
609.943	6602.6	6452.81	6452.6	6452.6	6527.81
609.843	6599.37	6449.57	6449.37	6449.37	6524.57
609.743	6611.9	6462.09	6461.9	6461.9	6537.09
609.643	6628.03	6478.22	6478.03	6478.03	6553.22
609.543	6622.33	6472.51	6472.33	6472.33	6547.51
609.443	6590.7	6440.87	6440.7	6440.7	6515.87
609.343	6602.93	6453.1	6452.93	6452.93	6528.1
609.243	6624.23	6474.4	6474.23	6474.23	6549.4
609.143	6635.17	6485.33	6485.17	6485.17	6560.33
609.043	6640.23	6490.39	6490.23	6490.23	6565.39
608.943	6628.17	6478.32	6478.17	6478.17	6553.32
608.843	6609.07	6459.21	6459.07	6459.07	6534.21
608.743	6609.83	6459.98	6459.83	6459.83	6534.98
608.643	6597.5	6447.64	6447.5	6447.5	6522.64
608.543	6599.37	6449.5	6449.37	6449.37	6524.5
608.443	6614.23	6464.36	6464.23	6464.23	6539.36
608.343	6620.63	6470.76	6470.63	6470.63	6545.76
608.243	6619.03	6469.16	6469.03	6469.03	6544.16
608.143	6609.43	6459.55	6459.43	6459.43	6534.55
608.043	6639.1	6489.22	6489.1	6489.1	6564.22
607.943	6668.27	6518.38	6518.27	6518.27	6593.38
607.843	6645.7	6495.81	6495.7	6495.7	6570.81
607.743	6631.47	6481.57	6481.47	6481.47	6556.57
607.643	6651.47	6501.57	6501.47	6501.47	6576.57
607.543	6656.33	6506.44	6506.33	6506.33	6581.44
607.443	6618.27	6468.37	6468.27	6468.27	6543.37
607.343	6647.13	6497.23	6497.13	6497.13	6572.23
607.243	6622.1	6472.2	6472.1	6472.1	6547.2
607.143	6618.4	6468.49	6468.4	6468.4	6543.49
607.043	6637.07	6487.16	6487.07	6487.07	6562.16
606.943	6650.2	6500.29	6500.2	6500.2	6575.29
606.843	6641.43	6491.52	6491.43	6491.43	6566.52
606.743	6641.8	6491.88	6491.8	6491.8	6566.88
606.643	6652.57	6502.65	6502.57	6502.57	6577.65
606.543	6652.27	6502.35	6502.27	6502.27	6577.35
606.443	6653.3	6503.38	6503.3	6503.3	6578.38
606.343	6657.47	6507.54	6507.47	6507.47	6582.54
606.243	6686.53	6536.61	6536.53	6536.53	6611.61
606.143	6637.27	6487.34	6487.27	6487.27	6562.34
606.043	6641.6	6491.67	6491.6	6491.6	6566.67
605.943	6636.53	6486.6	6486.53	6486.53	6561.6
605.843	6654.83	6504.9	6504.83	6504.83	6579.9
605.743	6678.27	6528.33	6528.27	6528.27	6603.33
605.643	6661.7	6511.77	6511.7	6511.7	6586.77
605.543	6633.43	6483.5	6483.43	6483.43	6558.5
605.443	6638.8	6488.86	6488.8	6488.8	6563.86
605.343	6671.27	6521.33	6521.27	6521.27	6596.33
605.243	6667	6517.06	6517	6517	6592.06
605.143	6662.67	6512.72	6512.67	6512.67	6587.72
605.043	6655.53	6505.59	6505.53	6505.53	6580.59
604.943	6647.87	6497.92	6497.87	6497.87	6572.92
604.843	6653.87	6503.92	6503.87	6503.87	6578.92
604.743	6656.47	6506.52	6506.47	6506.47	6581.52
604.643	6656.8	6506.85	6506.8	6506.8	6581.85
604.543	6655.37	6505.42	6505.37	6505.37	6580.42
604.443	6687.47	6537.52	6537.47	6537.47	6612.52
604.343	6691.7	6541.75	6541.7	6541.7	6616.75
604.243	6700.43	6550.48	6550.43	6550.43	6625.48
604.143	6693.4	6543.45	6543.4	6543.4	6618.45
604.043	6665.2	6515.25	6515.2	6515.2	6590.25
603.943	6677.97	6528.01	6527.97	6527.97	6603.01
603.843	6654.2	6504.24	6504.2	6504.2	6579.24
603.743	6672.67	6522.71	6522.67	6522.67	6597.71
603.643	6695	6545.04	6545	6545	6620.04
603.543	6692.37	6542.41	6542.37	6542.37	6617.41
603.443	6669.7	6519.74	6519.7	6519.7	6594.74
603.343	6668.53	6518.57	6518.53	6518.53	6593.57
603.243	6676.77	6526.81	6526.77	6526.77	6601.81
603.143	6700.53	6550.57	6550.53	6550.53	6625.57
603.043	6704.8	6554.84	6554.8	6554.8	6629.84
602.943	6690.23	6540.27	6540.23	6540.23	6615.27
602.843	6712	6562.04	6562	6562	6637.04
602.743	6686.27	6536.3	6536.27	6536.27	6611.3
602.643	6683.1	6533.14	6533.1	6533.1	6608.14
602.543	6694	6544.03	6544	6544	6619.03
602.443	6701.43	6551.47	6551.43	6551.43	6626.47
602.343	6688.33	6538.37	6538.33	6538.33	6613.37
602.243	6692.63	6542.67	6542.63	6542.63	6617.67
602.143	6697.53	6547.57	6547.53	6547.53	6622.57

## Sheet: Cycles XPS C35N0-33
Cycle	I-	I0	I5+	I7+
1	14.447	4.294	50.979	30.28
2	13.712	5.153	63.923	17.212
3	12.81	6.576	67.136	13.478
4	12.037	6.911	70.912	10.141
5	13.121	6.589	72.646	7.644
6	15.257	5.821	73	5.922
7	15.208	5.935	74.204	4.654
8	13.136	7.205	75.742	3.916
9	13.242	7.304	75.621	3.833
10	16.172	6.266	75.089	2.473
11	14.749	6.573	76.497	2.181
12	15.992	6.751	74.375	2.882
13	15.904	6.743	75.481	1.871
14	15.506	7.192	75.269	2.032
15	17.173	6.59	74.291	1.946

## Sheet: Oxydoreduction calculation
							Sample	T (K)	[I-]	[I0]	[I5+]	Ln K	K	fO2^3	fO2	log fO2	DQFM
							C35N0-2	1673	28.8	12.7	58.6	-17.4805	2.56039e-08	1.06003e-07	0.00473266	-2.32489	2.96
							C30N5-2	1673	14.5	0	85.5	-17.4805	2.56039e-08	8.9023e-07	0.00961983	-2.01683	3.26
							C20N15-2	1673	9.2	8.2	82.5	-17.4805	2.56039e-08	2.05891e-06	0.0127217	-1.89545	3.38
							C20N15-22	1673	nd	nd	nd	-17.4805	2.56039e-08
							C10N25-2	1673	9.9	8.2	81.9	-17.4805	2.56039e-08	1.75228e-06	0.0120559	-1.9188	3.36
							C0N35-2	1673	21.5	1.3	77.2	-17.4805	2.56039e-08	3.30114e-07	0.00691122	-2.16045	3.12
								Potential
								E I2/I-	0.54	V
								E O2/O2-	1.12	V
								E I2/IO3-	1.8	V
								F	96485	C.mol-1
								R	8.314	J.K-1.mol-1
